# Supplementary material for: Why did some parents not send their children back to school following school closures during the COVID-19 pandemic: a cross-sectional survey
Source: PubMed Central journal article supplement (PMC8482536; doi:10.1136/bmjpo-2020-001014), 2021-09-29
Supplement: bmjpo-2020-001014.draft_revisions.pdf [file bmjpo-2020-001014.draft_revisions.pdf]

# BMJ Paediatrics Open

BMJ Paediatrics Open is committed to open peer review. As part of this commitment we make the peer review history of every article we publish publicly available.

When an article is published we post the peer reviewers' comments and the authors' responses online. We also post the versions of the paper that were used during peer review. These are the versions that the peer review comments apply to.

The versions of the paper that follow are the versions that were submitted during the peer review process. They are not the versions of record or the final published versions. They should not be cited or distributed as the published version of this manuscript.

BMJ Paediatrics Open is an open access journal and the full, final, typeset and author-corrected version of record of the manuscript is available on our site with no access controls, subscription charges or pay-per-view fees (<http://bmjpaedsopen.bmj.com>).

If you have any questions on BMJ Paediatrics Open's open peer review process please email [info.bmjpo@bmj.com](mailto:info.bmjpo@bmj.com)

# BMJ Paediatrics Open

## Parents' willingness to send children back to school during the COVID-19 pandemic: a cross-sectional survey

|                               |                                                                                                                                                                                                                                                                                                                    |
|-------------------------------|--------------------------------------------------------------------------------------------------------------------------------------------------------------------------------------------------------------------------------------------------------------------------------------------------------------------|
| Journal:                      | <i>BMJ Paediatrics Open</i>                                                                                                                                                                                                                                                                                        |
| Manuscript ID                 | bmjpo-2020-001014                                                                                                                                                                                                                                                                                                  |
| Article Type:                 | Original research                                                                                                                                                                                                                                                                                                  |
| Date Submitted by the Author: | 30-Dec-2020                                                                                                                                                                                                                                                                                                        |
| Complete List of Authors:     | Woodland, Lisa; Weston Education Centre<br>Smith, Louise; King's College London<br>Webster, Rebecca K; The University of Sheffield<br>Amlôt, Richard; Public Health England<br>Rubin, Antonia; Weald of Kent Grammar School<br>Wessely, Simon; Institute of Psychiatry Psychology and Neuroscience<br>Rubin, James |
| Keywords:                     | COVID-19                                                                                                                                                                                                                                                                                                           |
|                               |                                                                                                                                                                                                                                                                                                                    |

SCHOLARONE™  
Manuscripts

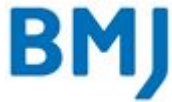

I, the Submitting Author has the right to grant and does grant on behalf of all authors of the Work (as defined in the below author licence), an exclusive licence and/or a non-exclusive licence for contributions from authors who are: i) UK Crown employees; ii) where BMJ has agreed a CC-BY licence shall apply, and/or iii) in accordance with the terms applicable for US Federal Government officers or employees acting as part of their official duties; on a worldwide, perpetual, irrevocable, royalty-free basis to BMJ Publishing Group Ltd ("BMJ") its licensees and where the relevant Journal is co-owned by BMJ to the co-owners of the Journal, to publish the Work in this journal and any other BMJ products and to exploit all rights, as set out in our [licence](#).

The Submitting Author accepts and understands that any supply made under these terms is made by BMJ to the Submitting Author unless you are acting as an employee on behalf of your employer or a postgraduate student of an affiliated institution which is paying any applicable article publishing charge ("APC") for Open Access articles. Where the Submitting Author wishes to make the Work available on an Open Access basis (and intends to pay the relevant APC), the terms of reuse of such Open Access shall be governed by a Creative Commons licence – details of these licences and which [Creative Commons](#) licence will apply to this Work are set out in our licence referred to above.

Other than as permitted in any relevant BMJ Author's Self Archiving Policies, I confirm this Work has not been accepted for publication elsewhere, is not being considered for publication elsewhere and does not duplicate material already published. I confirm all authors consent to publication of this Work and authorise the granting of this licence.

1  
2  
3 **Parents' willingness to send children back to school during the COVID-19**  
4 **pandemic: a cross-sectional survey**  
5

6 Lisa Woodland MSc, King's College London, Weston Education Centre, Cutcombe  
7 Road, London SE5 9RJ, UK  
8

9 Louise E Smith PhD, King's College London, Weston Education Centre, Cutcombe  
10 Road, London SE5 9RJ, UK  
11

12 Rebecca K Webster PhD, University of Sheffield, Cathedral Court, 1 Vicar Lane,  
13 Sheffield, S1 2LT, UK  
14

15 Richard Amlôt PhD, Public Health England, Emergency Response Department,  
16 Porton Down, Salisbury, SP4 0JG, UK  
17

18 Antonia Rubin MA (Cantab), Trustee at Weald of Kent Grammar School, Tudeley  
19 Lane, Tonbridge, Kent, TN9 2JP, UK.  
20

21 Simon Wessely PhD, King's College London, Weston Education Centre, Cutcombe  
22 Road, London SE5 9RJ, UK  
23

24 G James Rubin PhD, King's College London, Weston Education Centre, Cutcombe  
25 Road, London SE5 9RJ, UK  
26  
27  
28  
29

30 Correspondence to: Lisa Woodland, King's College London, Weston Education  
31 Centre, Cutcombe Road, London SE5 9RJ, UK, [lisa.woodland@kcl.ac.uk](mailto:lisa.woodland@kcl.ac.uk)  
32  
33  
34

35 **Word Count: 2,623**  
36  
37  
38  
39  
40  
41  
42  
43  
44  
45  
46  
47  
48  
49  
50  
51  
52  
53  
54  
55  
56  
57  
58  
59  
60

## Abstract

### BACKGROUND

Between 23<sup>rd</sup> of March and September 2020, schools closed to most children in England, in response to COVID-19. Parental willingness to send their children to school during this time is unclear.

### METHODS

1,994 parents or guardians of school-aged children completed a cross-sectional survey as schools partially re-opened (8<sup>th</sup> and 11<sup>th</sup> June 2020). We investigated factors associated with parental willingness to send their children to school.

### RESULTS

46% (n=370 / 803) of children in year-groups eligible to attend school and 13% (n=72 / 570) of children of key workers had attended school in the past seven days. The most common reasons for sending children to school were that the child's education would benefit, the child wanted to go to school, and the parent needed to work. A child was significantly more likely to attend if the parent believed the child had already had COVID-19, they had special educational needs, or a person in the household had COVID-19 symptoms. For children not eligible to attend, 38% (n=230 / 610) of participants would want to send the child to school, if it were possible. Participants were more likely to want to send their child back if the child was bored and were less likely to want to do so if they felt there was too much COVID-19 around, and that school would not be enjoyable.

### CONCLUSIONS

Following any future school closure, helping parents to feel comfortable returning their child to school will require policy makers and school leaders to communicate about the adequacy of their policies to: a) ensure that the risk to children in school is minimised; b) ensure that the educational potential within schools is maximised; and c) ensure that the benefits of school for the psychological well-being of children are prioritised.

### Key Words

Child; COVID-19; parents; school closures; England; cross-sectional studies

## Article Adds

### WHAT IS KNOWN ABOUT THE SUBJECT

The COVID-19 pandemic resulted in the mass closure of schools for an extended period of time. A previous systematic review assessed parental attitudes towards smaller scale closures, finding that many parents (71%-97% across six studies) approved of closures, particularly where they were seen as an effective protective measure against a serious illness. The effect on a child's education and ability of the parent to work were reported as concerns.

### WHAT THIS STUDY ADDS

During the partial reopening of schools in England, most parents did not send or want to send their children to school. Parents who were not educated to degree level, not working, who lived in the North of England or who were from Black, Asian and ethnic minority backgrounds were least likely to send their children back. Parents were more likely to want to send their child back to school if they had concerns about the impact of the closures on their child's mental well-being and education.

## Introduction

On 23<sup>rd</sup> March 2020, a nationwide closure of schools occurred across England in response to the COVID-19 pandemic. Schools were kept open for vulnerable children (those with a health care plan or social worker) and children of key workers.[1] From 1<sup>st</sup> June 2020 children in reception (four to five years), year one (five to six years) and year six (10 to 11 years) also became eligible to attend.[2] Until September 2020 school attendance remained voluntary.[3]

The benefits of closing schools to reduce the transmission of COVID-19 and the negative consequences of doing so are difficult to balance.[4,5] Adding to the debate was early evidence of a low transmission rate of COVID-19 among children [6-9] and a recognition that outbreaks may occur nonetheless.[10,11]

Irrespective of this debate, it is clear that many parents felt far from comfortable with their children attending school in the early stages of the pandemic, even where it was encouraged.[12] A systematic review of school closures suggested several factors that may be relevant to how comfortable a parent feels with their child attending school during an infectious disease outbreak.[13] These include perceived risk of infection,[14,15] concern about the impact of a closure on education,[14,16] and parental concerns about their child's mental health.[17] Understanding the key issues that determine a parent's willingness to send their children back to school following a closure, and ensuring that school policies and communications address these concerns, should help inform any future school closure decisions, in this or any future pandemic.

In this study, we investigated factors associated with a parent's willingness to send children to school during the COVID-19 pandemic. We investigated these factors in: parents of children in reception, year one, or year six; families where at least one parent was a key worker; and parents of school aged children who did not fall into these groups.

## Methods

### DESIGN

We commissioned a cross-sectional survey one week after schools in England re-opened for children in reception, year one, and year six (8<sup>th</sup> to 11<sup>th</sup> June 2020). We have previously reported data from this survey relating to parental perceptions of the presence of hygiene procedures within schools.[18]

### PARTICIPANTS

Participants (n=2,447) were recruited from BMG's online research panel and were eligible for the study if they were aged eighteen years or over, lived in England, and were a parent or guardian to a school-aged child (4-18 years) who usually lived with them. 183 participants were screened out for non-eligibility, 226 participants dropped out after starting the survey and 28 completed but were removed for quality-control purposes such as completing the survey quickly or for 'straight-lining' (selecting the same option for every question). This left 2,010 participants. Demographic information was monitored by the panel provider to improve the eventual sample's

1  
2  
3 representativeness (region, child age, child gender, parent/guardian age, and  
4 parent/guardian gender). The sample fell within five percentage points of the national  
5 population by the child's gender, key stage, and type of school attended against the  
6 known distribution for school children in England.[19]  
7

8  
9 Participants earned points from the research panel (equivalent to £0.60) which could  
10 be exchanged for products.  
11

## 12 SELECTION OF A CHILD TO ANSWER QUESTIONS ABOUT

13  
14 All participants were asked to select one child pseudorandomly to report on (the child  
15 with the most recent birthday). In cases where children shared a birthday, we asked  
16 the parent to select one child.  
17

18  
19 Our survey was split into two sections. Section one was only completed by parents  
20 who had a child eligible to attend school (in reception, year one, or year six and  
21 parents who did not have a child in these year groups, but they or their spouse were  
22 a key worker). Section two was completed by all parents. However, we have only  
23 included data from the second section for parents who did not complete section one.  
24

## 25 STUDY MATERIALS

26  
27 The full survey is available in the supplementary materials.  
28

## 29 PERSONAL CHARACTERISTICS

30  
31 We asked participants to report their gender, age, region, household income,  
32 employment status, marital status, ethnicity and level of education. We also asked  
33 whether anyone within the household was aged over 70 years, or had a health  
34 condition that made them vulnerable to COVID-19.  
35

36  
37 We asked participants to report the child's gender, age, school year, school type  
38 (fee-paying or state-funded) and whether the child had special educational needs  
39 (SEN).  
40

## 41 SCHOOL ATTENDANCE LAST WEEK

42  
43 Participants responding in section one were asked how many times the child had  
44 attended school in the past seven days. Depending on the response we presented  
45 parents with: ten reasons for why they were sending the child to school; twelve  
46 reasons for why they were only sending the child to school part-time; or sixteen  
47 reasons for why their child was not attending school. We asked participants to "tick  
48 any [statement] that applies". Participants also had the option to write-in text for  
49 "other reason".  
50  
51

## 52 WILLINGNESS TO SEND CHILD TO SCHOOL NEXT WEEK

53  
54 In section two we presented all participants with nine statements about schools re-  
55 opening including "if it were possible, I would want to send [name of child] to school  
56 next week." We also presented sixteen statements about the national restrictions  
57 more generally ('lockdown'). We asked participants to respond to each on a five-  
58 point Likert-type scale from "strongly agree" to "strongly disagree".  
59  
60



## COVID-19 SYMPTOMS

We asked all participants to report if the selected child had experienced any symptoms “in the past seven days” from a list of ten symptoms. We also asked if they or a household member (other than the child) had experienced symptoms “in the past 14 days” from the same symptom list. We asked participants whether they thought their child had had COVID-19.

## WELL-BEING

We asked all participants to report the child’s well-being using two subscales from the Revised Child Anxiety Disorder Scale (RCADS):[20] the generalised anxiety disorder (GAD) sub-scale and the major depressive disorder (MDD) sub-scale.

## Ethics

The research was approved by the Psychiatry, Nursing and Midwifery Research Ethics Subcommittee at King’s College London (LRS—19/20-18787).

## Patient and public involvement.

A school trustee contributed to the development of the survey materials and co-authored this paper.

## Analysis

School attendance was defined as a child who attended school for at least one day, in the past seven days. Willingness to send a child to school next week was defined as a participant reporting “strongly agree” or “tend to agree” to this item. Variables were coded as displayed in the results.

We ran a series of binary logistic regressions using SPSS v26.0,[21] investigating univariable associations between each of our predictor variables and sending the child to school or wanting to send the child to school. We ran a second set of binary logistic regressions controlling for personal characteristics.

We analysed frequencies for the reasons given for sending an eligible child to school for a full week (five days), part-time (less than five days), and not sending the child to school.

For ease of interpretation, we used unweighted data in our analysis.

We applied a Bonferroni correction to our results ( $p \leq .001$ ) due to running many analyses (children in school years  $n=29$ , children of key workers  $n=31$ , children non-eligible for school  $n=53$ ). Results meeting this criterion are marked by a double asterisk (\*\*) in the tables.

## SAMPLE SIZE CALCULATION

During analysis, we identified some logical inconsistencies suggesting that 16 participants had accidentally completed the wrong section of the survey – we removed these participants from the analyses. Our final sample ( $n=1,994$ ) was powered to give a confidence interval of approximately plus or minus 2% for each

prevalence estimate. The three subsamples (children in eligible school years, n=803; key workers, n=570; children not eligible for school, n=621) reported in this paper all had a margin of error of plus or minus 5% at the 95% confidence level.

## Results

### WILLINGNESS TO SEND ELIGIBLE CHILDREN TO SCHOOL

803 participants had children in reception, year one, or year six and 570 participants reported they and or their spouse were a key worker, and that they did not have a child in eligible school years. Only n=432, 54% of children in eligible school years and n=72, 13% of children of key workers had attended school in the past seven days. One participant in each group did not know if their child had attended school. The most common reported reasons were thinking it was too risky for the child to attend school and that the school was not open (see table 1). Table 2 shows the reasons for participants to send their child to school. The most common reported reasons were the child's education would benefit and the parent needing to work. Of participants whose child attended school part-time participants commonly reported it was because the school only offered for them to be in part-time (see table 3).

Table 1: Participant reasons for children eligible for school, who had not attended school in the past week.

| Reason                                                                                                           | Children in School Years (n=432, %) | Children of Key Workers (n=497, %) |
|------------------------------------------------------------------------------------------------------------------|-------------------------------------|------------------------------------|
| I think it is too risky for my child to attend school at the moment                                              | 223 (52%)                           | 109 (22%)                          |
| The school is not open                                                                                           | 140 (32%)                           | 259 (52%)                          |
| I have another child who can't go to school                                                                      | 67 (15.5%)                          | 24 (5%)                            |
| Being at school will be stressful for my child                                                                   | 59 (14%)                            | 23 (5%)                            |
| I think they will get a better education at home than at school at the moment                                    | 57 (13%)                            | 25 (5%)                            |
| The school has asked my child not to attend                                                                      | 51 (12%)                            | 117 (23.5%)                        |
| Someone in my household is clinically vulnerable to coronavirus                                                  | 45 (10%)                            | 24 (5%)                            |
| My child doesn't want to go                                                                                      | 44 (10%)                            | 29 (6%)                            |
| There's no point, schools will shut again soon anyway                                                            | 37 (9%)                             | 13 (3%)                            |
| My child's friends will not be at school                                                                         | 28 (6.5%)                           | 19 (4%)                            |
| Other reason                                                                                                     | 28 (6.5%)                           | 65 (13%)                           |
| I think friends, family or other parents will judge me if I send my child to school                              | 12 (3%)                             | 4 (1%)                             |
| I can't arrange transport to get them to school                                                                  | 6 (1%)                              | 10 (2%)                            |
| Someone else at the school developed coronavirus symptoms (cough or fever, or change in sense of taste or smell) | 6 (1%)                              | 4 (1%)                             |
| My child developed symptoms of a different illness                                                               | 3 (1%)                              | 1 (0%)                             |
| They have developed coronavirus symptoms (cough or fever, or change in sense of taste or smell)                  | 2 (0.5%)                            | 2 (0%)                             |
| Someone else in the family developed coronavirus symptoms (cough or fever, or change in sense of taste or smell) | 0 (0%)                              | 3 (1%)                             |

Table 2: Participant reasons for children eligible for school, who had attended school at least one day in the past week.

| Reason | Children in School Years (n=370, %) | Children of Key Workers (n=72, %) |
|--------|-------------------------------------|-----------------------------------|
|--------|-------------------------------------|-----------------------------------|

|                                                                                           |             |            |
|-------------------------------------------------------------------------------------------|-------------|------------|
| My child's education will benefit from being at school                                    | 208 (56%)   | 30 (42%)   |
| My child wants to go to school                                                            | 200 (54%)   | 35 (49%)   |
| My child will benefit from seeing their friends                                           | 187 (50.5%) | 27 (37.5%) |
| I need to work                                                                            | 120 (32%)   | 40 (56%)   |
| I don't believe my child will be at risk at school                                        | 96 (26%)    | 17 (24%)   |
| Having my child at home is a strain                                                       | 57 (15%)    | 10 (14%)   |
| It is compulsory for my child to attend                                                   | 50 (13.5%)  | 9 (12.5%)  |
| It reduces costs at home                                                                  | 48 (13%)    | 7 (10%)    |
| I think friends, family or other parents will judge me if I don't send my child to school | 43 (12%)    | 11 (15%)   |
| I have non-work commitments I need to meet                                                | 21 (6%)     | 4 (6%)     |
| Other                                                                                     | 9 (2%)      | 3 (4%)     |

Table 3: Participant reasons for children eligible for school, who attended school part-time.

| Reason                                                                                                           | Children in School Years (n=204, %) | Children of Key Workers (n=39, %) |
|------------------------------------------------------------------------------------------------------------------|-------------------------------------|-----------------------------------|
| The school only offers for them to be in part-time                                                               | 80 (39%)                            | 16 (41%)                          |
| It is less risky for them to be in part-time                                                                     | 40 (20%)                            | 7 (18%)                           |
| I am only sending them in on days where the lessons are important                                                | 28 (14%)                            | 8 (20.5%)                         |
| Other reason                                                                                                     | 27 (13%)                            | 3 (8%)                            |
| I am using it as childcare and I only need them in part time                                                     | 24 (12%)                            | 6 (15%)                           |
| I am only sending them in on days when I can arrange transport                                                   | 23 (11%)                            | 4 (10%)                           |
| Someone else at the school developed coronavirus symptoms (cough or fever, or change in sense of taste or smell) | 14 (7%)                             | 1 (3%)                            |
| I started sending them in, but have now changed my mind                                                          | 13 (6%)                             | 2 (5%)                            |
| They have developed coronavirus symptoms (cough or fever, or change in sense of taste or smell)                  | 13 (6%)                             | 1 (3%)                            |
| Someone else in the family developed coronavirus symptoms (cough or fever, or change in sense of taste or smell) | 12 (6%)                             | 0 (0%)                            |
| I am only sending them in on days when their friends are in                                                      | 11 (5%)                             | 6 (15%)                           |
| My child developed symptoms of a different illness                                                               | 9 (4%)                              | 0 (0%)                            |
| They only live with me part time                                                                                 | 6 (3%)                              | 1 (3%)                            |

Participant characteristics for children in eligible school years and for children of key workers are shown in table 4. Parents of children in eligible school years were less likely to send the child to school if they were educated to A-level or below, not working, of Black, Asian and minority ethnicity (BAME), or living in the North East, North West, and Yorkshire and the Humber compared to London. Whereas children of key workers were more likely to attend school for participants aged 45 and under and who were working. Child attendance was more likely for children in eligible school years when in a fee-paying school and if they had a health condition that made them vulnerable to COVID-19. For both groups' attendance was more likely for children who had special educational needs, reported low well-being, thought their child had had COVID-19 and when a person over 70 was living in the household. There was also a significant association in both groups between a child being more likely to attend school and the child having experienced COVID-19 symptoms in the

1  
2  
3 past 7 days, or another person in the household having experienced COVID-19  
4 symptoms in the past 14 days.  
5  
6  
7  
8  
9  
10  
11  
12  
13  
14  
15  
16  
17  
18  
19  
20  
21  
22  
23  
24  
25  
26  
27  
28  
29  
30  
31  
32  
33  
34  
35  
36  
37  
38  
39  
40  
41  
42  
43  
44  
45  
46  
47  
48  
49  
50  
51  
52  
53  
54  
55  
56  
57  
58  
59  
60

Confidential: For Review Only

Table 4. Participant characteristics for children in eligible school years (n=803) and children of key works (n=570), by school attendance.

| Level                          | Children in Eligible school years |                        |                     |                                | Children of key workers      |                        |                     |                                |                               |
|--------------------------------|-----------------------------------|------------------------|---------------------|--------------------------------|------------------------------|------------------------|---------------------|--------------------------------|-------------------------------|
|                                | Did not attend school, n (%)      | Attended School, n (%) | Odds ratio (95% CI) | Adjusted odds ratio (95% CI) † | Did not attend school, n (%) | Attended School, n (%) | Odds ratio (95% CI) | Adjusted odds ratio (95% CI) † |                               |
| Gender                         | Male                              | 201 (52)               | 187 (48)            | 1.22 (0.92 to 1.61)            | 1.04 (0.75 to 1.43)          | 227 (85)               | 39 (15)             | 1.53 (0.92 to 2.55)            | 1.61 (0.91 to 2.85)           |
|                                | Female                            | 230 (57)               | 177 (43)            | Reference                      | Reference                    | 268 (90)               | 30 (10)             | Reference                      | Reference                     |
| Age                            | 18-35 years                       | 129 (49)               | 136 (51)            | 1.37 (0.92 to 2.03)            | 1.23 (0.79 to 1.92)          | 54 (77)                | 16 (23)             | <b>3.16* (1.56 to 6.37)</b>    | <b>2.95* (1.23 to 7.08)</b>   |
|                                | 36-45 years                       | 212 (56)               | 164 (44)            | 1.01 (0.70 to 1.46)            | 0.98 (0.65 to 1.48)          | 198 (86)               | 33 (14)             | <b>1.76* (1.01 to 3.12)</b>    | <b>2.14* (1.12 to 4.09)</b>   |
|                                | 46 years ≥                        | 91 (56.5)              | 70 (43.5)           | Reference                      | Reference                    | 245 (91)               | 23 (9)              | Reference                      | Reference                     |
| Region                         | East Midlands                     | 33 (60)                | 22 (40)             | <b>0.50* (0.27 to 0.93)</b>    | 0.59 (0.31 to 1.14)          | 45 (85)                | 8 (15)              | 0.85 (0.32 to 2.22)            | 1.23 (0.40 to 3.75)           |
|                                | East of England                   | 38 (48)                | 41 (52)             | 0.81 (0.48 to 1.38)            | 0.92 (0.52 to 1.64)          | 54 (82)                | 12 (18)             | 1.06 (0.45 to 2.52)            | 1.38 (0.50 to 3.81)           |
|                                | North East                        | 33 (67)                | 16 (33)             | <b>0.36* (0.19 to 0.71)</b>    | <b>0.38* (0.81 to 0.78)</b>  | 32 (89)                | 4 (11)              | 0.60 (0.18 to 1.98)            | 0.93 (0.25 to 3.46)           |
|                                | North West                        | 68 (65)                | 36 (35)             | <b>0.40** (0.24 to 0.66)</b>   | <b>0.39* (0.23 to 0.68)</b>  | 80 (93)                | 6 (7)               | <b>0.36* (0.13 to 0.99)</b>    | 0.61 (0.19 to 1.89)           |
|                                | South East                        | 70 (51)                | 66 (49)             | 0.71 (0.45 to 1.11)            | 0.92 (0.56 to 1.52)          | 82 (89)                | 10 (11)             | 0.58 (0.24 to 1.94)            | 0.81 (0.29 to 2.29)           |
|                                | South West                        | 24 (46)                | 28 (54)             | 0.88 (0.47 to 1.63)            | 1.16 (0.58 to 2.31)          | 42 (87.5)              | 6 (12.5)            | 0.68 (0.42 to 1.94)            | 1.18 (0.37 to 3.82)           |
|                                | West Midlands                     | 39 (56)                | 30 (44)             | 0.58 (0.33 to 1.01)            | 0.63 (0.34 to 1.18)          | 48 (89)                | 6 (11)              | 0.60 (0.21 to 1.68)            | 0.84 (0.27 to 2.60)           |
|                                | Yorkshire & the Humber            | 52 (62)                | 31 (37)             | <b>0.45* (0.26 to 0.76)</b>    | <b>0.52* (0.29 to 0.93)</b>  | 52 (88)                | 7 (12)              | 0.64 (0.24 to 1.73)            | 0.80 (0.27 to 2.41)           |
|                                | London                            | 75 (43)                | 100 (57)            | Reference                      | Reference                    | 62 (83)                | 13 (17)             | Reference                      | Reference                     |
| Household income               | ≤ £34,999                         | 164 (54)               | 142 (46)            | 1.00 (0.75 to 1.33)            | 1.34 (0.95 to 1.90)          | 185 (89)               | 23 (11)             | 0.75 (0.44 to 1.28)            | 0.96 (0.51 to 1.81)           |
|                                | £35,000 ≥                         | 254 (54)               | 220 (46)            | Reference                      | Reference                    | 285 (86)               | 47 (14)             | Reference                      | Reference                     |
| Employment status <sup>1</sup> | Working                           | 362 (52)               | 337 (48)            | <b>1.95* (1.25 to 3.05)</b>    | <b>1.94* (1.16 to 3.24)</b>  | 435 (86)               | 70 (14)             | <b>9.33* (1.27 to 68.47)</b>   | <b>8.64* (1.13 to 65.96)</b>  |
|                                | Not working                       | 67 (68)                | 32 (32)             | Reference                      | Reference                    | 58 (98)                | 1 (2)               | Reference                      | Reference                     |
| Education level                | ≤ A-level                         | 179 (63)               | 105 (37)            | <b>0.56** (0.41 to 0.75)</b>   | <b>0.59* (0.42 to 0.84)</b>  | 227 (88)               | 31 (12)             | 0.91 (0.55 to 1.51)            | 1.27 (0.71 to 2.26)           |
|                                | Degree ≥                          | 248 (49)               | 261 (51)            | Reference                      | Reference                    | 267 (87)               | 40 (13)             | Reference                      | Reference                     |
| Marital status                 | Living alone                      | 49 (48)                | 54 (52)             | 1.34 (0.88 to 2.02)            | 1.30 (0.82 to 2.06)          | 75 (88)                | 10 (12)             | 0.91 (0.45 to 1.85)            | 0.92 (0.41 to 2.03)           |
|                                | Married/cohabiting                | 383 (55)               | 316 (45)            | Reference                      | Reference                    | 422 (87)               | 62 (13)             | Reference                      | Reference                     |
| Ethnicity                      | White                             | 355 (53)               | 316 (47)            | 1.23 (0.84 to 1.12)            | <b>1.66* (1.07 to 2.58)</b>  | 450 (87)               | 65 (13)             | 1.04 (0.42 to 2.53)            | 1.47 (0.53 to 4.13)           |
|                                | BAME                              | 72 (58)                | 52 (42)             | Reference                      | Reference                    | 43 (88)                | 12 (22)             | Reference                      | Reference                     |
| Child gender                   | Boy                               | 230 (51.5)             | 217 (48.5)          | 1.25 (0.94 to 1.65)            | 1.15 (0.85 to 1.56)          | 244 (87)               | 36 (13)             | 1.04 (0.63 to 1.70)            | 0.96 (0.56 to 1.66)           |
|                                | Girl                              | 202 (57)               | 153 (43)            | Reference                      | Reference                    | 253 (87.5)             | 36 (12.5)           | Reference                      | Reference                     |
| School year                    | Early Years                       | 77 (59)                | 53 (41)             | 0.74 (0.50 to 1.10)            | 0.79 (0.51 to 1.23)          | ***                    | ***                 | ***                            | ***                           |
|                                | Key Stage 1                       | 157 (54)               | 132 (46)            | 0.90 (0.66 to 1.22)            | 0.88 (0.63 to 1.24)          | 30 (86)                | 5 (14)              | 2.10 (0.57 to 7.81)            | 1.52 (0.37 to 6.30)           |
|                                | Key Stage 2                       | 198 (52)               | 185 (48)            | Reference                      | Reference                    | 120 (86)               | 20 (15)             | 2.10 (0.75 to 5.86)            | 1.45 (0.47 to 4.44)           |
|                                | Key Stage 3                       | ***                    | ***                 | ***                            | ***                          | 152 (87)               | 23 (13)             | 1.91 (0.69 to 5.24)            | 1.58 (0.55 to 4.55)           |
|                                | Key Stage 4                       | ***                    | ***                 | ***                            | ***                          | 132 (87)               | 19 (13)             | 1.81 (0.65 to 5.08)            | 1.44 (0.49 to 4.24)           |
|                                | Years 12 & 13                     | ***                    | ***                 | ***                            | ***                          | 63 (93)                | 5 (7)               | Reference                      | Reference                     |
| School type                    | Fee-paying                        | 35 (33)                | 71 (67)             | <b>2.68** (1.74 to 4.13)</b>   | <b>2.50** (1.56 to 4.00)</b> | 30 (77)                | 9 (23)              | <b>2.20* (1.00 to 4.85)</b>    | 2.04 (0.82 to 5.07)           |
|                                | State-funded                      | 395 (57)               | 299 (43)            | Reference                      | Reference                    | 462 (88)               | 63 (12)             | Reference                      | Reference                     |
| Child has SEN                  | Yes                               | 22 (31)                | 48 (69)             | <b>2.78** (1.64 to 4.70)</b>   | <b>2.30* (1.27 to 4.17)</b>  | 28 (61)                | 18 (39)             | <b>5.74** (2.97 to 11.08)</b>  | <b>7.92** (3.59 to 17.46)</b> |
|                                | No                                | 406 (56)               | 319 (44)            | Reference                      | Reference                    | 464 (90)               | 52 (10)             | Reference                      | Reference                     |
| Low child well-being           | Yes                               | 92 (42)                | 124 (57)            | <b>1.86** (1.36 to 2.55)</b>   | <b>1.47* (1.04 to 2.07)</b>  | 127 (82)               | 28 (18)             | <b>1.85* (1.11 to 3.10)</b>    | <b>1.78* (1.00 to 3.21)</b>   |
|                                | No                                | 340 (58)               | 246 (42)            | Reference                      | Reference                    | 370 (89)               | 44 (11)             | Reference                      | Reference                     |

|                                         |     |            |            |                               |                               |            |           |                               |                               |
|-----------------------------------------|-----|------------|------------|-------------------------------|-------------------------------|------------|-----------|-------------------------------|-------------------------------|
| Child vulnerable COVID-19               | Yes | 28 (39)    | 44 (61)    | <b>2.00* (1.21 to 3.28)</b>   | <b>1.76* (1.00 to 3.10)</b>   | 33 (82.5)  | 7 (17.5)  | 1.49 (0.63 to 3.50)           | 0.93 (0.33 to 2.63)           |
|                                         | No  | 401 (56)   | 316 (44)   | Reference                     | Reference                     | 455 (87.5) | 65 (12.5) | Reference                     | Reference                     |
| Household vulnerable COVID-19           | Yes | 115 (60)   | 78 (40)    | 0.78 (0.56 to 1.08)           | 0.74 (0.51 to 1.06)           | 134 (88)   | 18 (12)   | 0.90 (0.50 to 1.60)           | 0.56 (0.44 to 1.67)           |
|                                         | No  | 295 (53)   | 258 (47)   | Reference                     | Reference                     | 314 (87)   | 47 (13)   | Reference                     | Reference                     |
| Child COVID-19 symptoms                 | Yes | 15 (24)    | 47 (76)    | <b>5.05** (2.22 to 7.36)</b>  | <b>3.02* (1.49 to 6.15)</b>   | 11 (58)    | 8 (42)    | <b>5.52** (2.14 to 14.24)</b> | <b>5.25* (1.58 to 17.41)</b>  |
|                                         | No  | 417 (56)   | 323 (44)   | Reference                     | Reference                     | 486 (88)   | 64 (12)   | Reference                     | Reference                     |
| Household COVID-19 symptoms             | Yes | 9 (17)     | 43 (83)    | <b>6.18** (2.97 to 12.86)</b> | <b>6.04** (2.62 to 13.91)</b> | 13 (65)    | 7 (35)    | <b>4.00* (1.54 to 10.42)</b>  | <b>4.11* (1.26 to 13.44)</b>  |
|                                         | No  | 423 (56)   | 327 (43)   | Reference                     | Reference                     | 484 (88)   | 65 (12)   | Reference                     | Reference                     |
| Child has had or currently has COVID-19 | Yes | 36 (24)    | 112 (76)   | <b>4.78** (3.18 to 7.17)</b>  | <b>4.03** (2.57 to 6.30)</b>  | 40 (67)    | 20 (33)   | <b>4.40** (2.40 to 8.08)</b>  | <b>5.20** (2.48 to 10.93)</b> |
|                                         | No  | 396 (61)   | 258 (37)   | Reference                     | Reference                     | 457 (90)   | 52 (10)   | Reference                     | Reference                     |
| Someone over 70 years                   | Yes | 11 (26)    | 32 (74)    | <b>3.62** (1.80 to 7.30)</b>  | <b>3.19* (1.45 to 7.05)</b>   | 8 (57)     | 6 (43)    | <b>5.56* (1.87 to 16.52)</b>  | <b>3.49* (0.98 to 12.46)</b>  |
|                                         | No  | 421 (55.5) | 338 (44.5) | Reference                     | Reference                     | 489 (88)   | 66 (12)   | Reference                     | Reference                     |

\*  $p \leq .05$  and formatted bold

\*\*  $p \leq .001$  and formatted bold

\*\*\* data not applicable for the sample

† Adjusting for participant gender, age, region, household income, employment status, education level, marital status, participant ethnicity, and the child's gender, school year and school-type.

<sup>1</sup> Working includes students and volunteers

Decimal places have been used for rounding errors

## WILLINGNESS TO SEND NON-ELIGIBLE CHILDREN TO SCHOOL NEXT WEEK

Of the remaining 621 participants, most reported not wanting to send their child to school (n=380, 62%), characteristics are shown in table 5. Participants educated at degree level, had children in Key Stage 2 and who thought their child had already had COVID-19 were more likely to send their child to school. This was also true if the child had been bored, and if the participant had found it hard to keep up with work or other important commitments (see table 6). There was a strong association between feeling comfortable in sending the child to school next week and wanting to send the child to school. Participants were less likely to want to send their child to school if they felt: there was still too much COVID-19 around for schools to be able to re-open safely; child was worried about coronavirus; that when schools fully re-open, some parents will send their children to school even if they have symptoms of coronavirus; children would not wash their hands properly at school; schools will not be able to provide good quality education at the moment; and schools will not be an enjoyable place for the child to be at the moment.

Table 5. Characteristics for participants when they or their spouse are not a key worker and do not have a child in reception, year one and year six (n=621), by want to send to school next week.

|                                | Level                  | Do not want to send to school, n (%) | Want to send to school, n (%) | Odds ratio (95% CI)         | Adjusted odds ratio (95% CI) † |
|--------------------------------|------------------------|--------------------------------------|-------------------------------|-----------------------------|--------------------------------|
| Gender                         | Male                   | 147 (56)                             | 116 (44)                      | <b>1.61* (1.15 to 2.24)</b> | <b>1.47* (1.00 to 2.17)</b>    |
|                                | Female                 | 232 (67)                             | 114 (33)                      | Reference                   | Reference                      |
| Age                            | 18-35 years            | 41 (74.5)                            | 14 (25.5)                     | 0.54 (0.28 to 1.03)         | 0.73 (0.35 to 1.54)            |
|                                | 36-45 years            | 151 (61)                             | 97 (39)                       | 1.02 (0.72 to 1.43)         | 1.10 (0.73 to 1.66)            |
|                                | 46 years ≥             | 188 (61)                             | 119 (39)                      | Reference                   | Reference                      |
| Region                         | East Midlands          | 27 (63)                              | 16 (37)                       | 0.70 (0.33 to 1.46)         | 0.77 (0.33 to 1.77)            |
|                                | East of England        | 41 (58)                              | 30 (42)                       | 0.86 (0.46 to 1.61)         | 0.90 (0.45 to 1.82)            |
|                                | North East             | 21 (68)                              | 10 (32)                       | 0.56 (0.24 to 1.32)         | 0.60 (0.23 to 1.57)            |
|                                | North West             | 54 (67.5)                            | 26 (32.5)                     | 0.56 (0.30 to 1.06)         | 0.74 (0.37 to 1.48)            |
|                                | South East             | 68 (66)                              | 35 (34)                       | 0.60 (0.34 to 1.08)         | 0.65 (0.34 to 1.24)            |
|                                | South West             | 37 (62)                              | 23 (38)                       | 0.73 (0.37 to 1.42)         | 0.83 (0.40 to 1.75)            |
|                                | West Midlands          | 54 (65)                              | 29 (35)                       | 0.63 (0.34 to 1.16)         | 0.61 (0.30 to 1.21)            |
|                                | Yorkshire & the Humber | 30 (60)                              | 20 (40)                       | 0.78 (0.39 to 1.58)         | 1.25 (0.57 to 2.77)            |
|                                | London                 | 48 (54)                              | 41 (46)                       | Reference                   | Reference                      |
| Household income               | ≤ £34,999              | 188 (68)                             | 90 (32)                       | <b>0.61* (0.43 to 0.86)</b> | 0.89 (0.59 to 1.33)            |
|                                | £35,000 ≥              | 163 (56)                             | 128 (44)                      | Reference                   | Reference                      |
| Employment status <sup>1</sup> | Working                | 271 (60)                             | 183 (40)                      | <b>1.57* (1.06 to 2.32)</b> | 1.50 (0.94 to 2.39)            |
|                                | Not working            | 107 (70)                             | 46 (30)                       | Reference                   | Reference                      |
| Education level                | ≤ A-level              | 204 (68)                             | 95 (32)                       | <b>0.61* (0.44 to 0.85)</b> | <b>0.62* (0.42 to 0.91)</b>    |
|                                | Degree ≥               | 175 (57)                             | 133 (43)                      | Reference                   | Reference                      |
| Marital Status                 | Living alone           | 96 (70)                              | 41 (30)                       | <b>0.64* (0.43 to 0.97)</b> | 0.69 (0.43 to 1.09)            |
|                                | Married/cohabiting     | 284 (60)                             | 189 (40)                      | Reference                   | Reference                      |
| Ethnicity                      | White                  | 334 (62)                             | 208 (38)                      | 1.37 (0.79 to 2.39)         | 1.72 (0.90 to 3.29)            |
|                                | BAME                   | 44 (69)                              | 20 (31)                       | Reference                   | Reference                      |
| Child gender                   | Boy                    | 195 (61)                             | 195 (39)                      | 1.15 (0.83 to 1.60)         | 1.25 (0.87 to 1.79)            |
|                                | Girl                   | 185 (64)                             | 104 (36)                      | Reference                   | Reference                      |
| Child school year              | Key Stage 1            | 36 (69)                              | 16 (31)                       | 0.91 (0.43 to 1.91)         | 1.14 (0.50 to 2.62)            |
|                                | Key Stage 2            | 72 (52)                              | 67 (48)                       | <b>1.90* (1.07 to 3.35)</b> | <b>2.77* (1.44 to 5.35)</b>    |
|                                | Key Stage 3            | 123 (67)                             | 60 (33)                       | 0.99 (0.57 to 1.73)         | 1.23 (0.66 to 2.28)            |
|                                | Key Stage 4            | 94 (61)                              | 60 (39)                       | 1.30 (0.74 to 2.28)         | 1.60 (0.86 to 2.96)            |
|                                | Years 12 & 13          | 55 (67)                              | 27 (33)                       | Reference                   | Reference                      |

|                                         |              |            |            |                             |                             |
|-----------------------------------------|--------------|------------|------------|-----------------------------|-----------------------------|
| Child school type                       | Fee-paying   | 27 (64)    | 15 (36)    | 0.90 (0.47 to 1.72)         | 1.07 (0.50 to 2.30)         |
|                                         | State-funded | 347 (62)   | 215 (38)   | Reference                   | Reference                   |
| Child has SEN                           | Yes          | 28 (72)    | 11 (28)    | 0.63 (0.31 to 1.28)         | 0.55 (0.24 to 1.26)         |
|                                         | No           | 349 (61)   | 219 (39)   | Reference                   | Reference                   |
| Low child well-being                    | Yes          | 94 (64)    | 53 (36)    | 0.91 (0.62 to 1.34)         | 0.83 (0.54 to 1.27)         |
|                                         | No           | 286 (62)   | 177 (38)   | Reference                   | Reference                   |
| Child vulnerable COVID-19               | Yes          | 29 (71)    | 12 (29)    | 0.66 (0.33 to 1.32)         | 0.56 (0.26 to 1.23)         |
|                                         | No           | 347 (61.5) | 217 (38.5) | Reference                   | Reference                   |
| Household vulnerable COVID-19           | Yes          | 106 (69)   | 48 (31)    | <b>0.64* (0.43 to 0.95)</b> | 0.75 (0.49 to 1.16)         |
|                                         | No           | 222 (58)   | 158 (42)   | Reference                   | Reference                   |
| Child has had or currently has COVID-19 | Yes          | 6 (40)     | 24 (60)    | <b>2.65* (1.38 to 5.10)</b> | <b>2.82* (1.35 to 5.91)</b> |
|                                         | No           | 364 (64)   | 206 (36)   | Reference                   | Reference                   |
| Someone over 70 years                   | Yes          | 22 (73)    | 8 (27)     | 0.57 (0.26 to 1.34)         | 0.58 (0.23 to 1.46)         |
|                                         | No           | 358 (62)   | 358 (38)   | Reference                   | Reference                   |

\*  $p \leq .05$  and formatted bold

† Adjusting for participant gender, age, region, household income, employment status, education level, marital status, participant ethnicity, and the child's gender, school year and school-type.

‡ Working includes students and volunteers

Decimal places have been used for rounding errors

Table 6: Participant perceptions for children not eligible for school, by want to send to school.

|                                                                                                        | Level    | Do not want to send to school (n, %) | Want to send to school (n, %) | Odds ratio (95% CI)          | Adjusted odds ratio (95% CI) † |
|--------------------------------------------------------------------------------------------------------|----------|--------------------------------------|-------------------------------|------------------------------|--------------------------------|
| If child goes out, she/he is likely to catch coronavirus                                               | Agree    | 56 (66%)                             | 29 (34%)                      | 0.82 (0.51 to 1.32)          | 0.81 (0.47 to 1.42)            |
|                                                                                                        | Disagree | 316 (61%)                            | 200 (39%)                     | Reference                    | Reference                      |
| If child goes out, she/he is likely to bring coronavirus back into our home                            | Agree    | 58 (60%)                             | 38 (40%)                      | 1.07 (0.69 to 1.67)          | 1.14 (0.68 to 1.90)            |
|                                                                                                        | Disagree | 312 (62%)                            | 191 (38%)                     | Reference                    | Reference                      |
| Child is keeping up with his/her schoolwork                                                            | Agree    | 269 (63%)                            | 161 (37%)                     | 0.98 (0.68 to 1.42)          | 0.88 (0.58 to 1.32)            |
|                                                                                                        | Disagree | 103 (62%)                            | 63 (38%)                      | Reference                    | Reference                      |
| I feel confident helping child with her/his schoolwork                                                 | Agree    | 234 (59%)                            | 164 (41%)                     | <b>1.56* (1.09 to 2.2.4)</b> | 1.28 (0.86 to 1.90)            |
|                                                                                                        | Disagree | 138 (69%)                            | 62 (31%)                      | Reference                    | Reference                      |
| I feel supported by child's school                                                                     | Agree    | 221 (61%)                            | 143 (39%)                     | 1.15 (0.82 to 1.60)          | 1.22 (0.84 to 1.77)            |
|                                                                                                        | Disagree | 154 (64%)                            | 87 (36%)                      | Reference                    | Reference                      |
| I have access to all the resources that child needs to do her/his schoolwork                           | Agree    | 260 (60%)                            | 172 (40%)                     | 1.40 (0.96 to 2.04)          | 1.33 (0.87 to 2.02)            |
|                                                                                                        | Disagree | 112 (68%)                            | 53 (32%)                      | Reference                    | Reference                      |
| During lockdown, child has learned about important things she/he wouldn't normally learn at school     | Agree    | 194 (61%)                            | 124 (39%)                     | 1.10 (0.79 to 1.53)          | 1.05 (0.73 to 1.51)            |
|                                                                                                        | Disagree | 183 (63%)                            | 106 (37%)                     | Reference                    | Reference                      |
| In the past 7 days, child has been bored                                                               | Agree    | 214 (56.5%)                          | 165 (43.5%)                   | <b>1.97** (1.39 to 2.80)</b> | <b>2.05** (1.38 to 3.05)</b>   |
|                                                                                                        | Disagree | 166 (72%)                            | 65 (28%)                      | Reference                    | Reference                      |
| In the past 7 days, my household has had a regular structure to the day                                | Agree    | 249 (61%)                            | 229 (39%)                     | 1.16 (0.82 to 1.65)          | 0.97 (0.66 to 1.43)            |
|                                                                                                        | Disagree | 130 (65%)                            | 71 (35%)                      | Reference                    | Reference                      |
| In the past 7 days, child has kept in touch with her/his friends                                       | Agree    | 275 (61%)                            | 179 (39%)                     | 1.30 (0.89 to 1.91)          | 1.22 (0.79 to 1.92)            |
|                                                                                                        | Disagree | 102 (67%)                            | 51 (33%)                      | Reference                    | Reference                      |
| Child is worried about coronavirus                                                                     | Agree    | 179 (67%)                            | 87 (33%)                      | <b>0.67* (0.48 to 0.94)</b>  | <b>0.69* (0.47 to 0.99)</b>    |
|                                                                                                        | Disagree | 198 (58%)                            | 143 (42%)                     | Reference                    | Reference                      |
| In the past 7 days, child has felt upset about not seeing other family members who do not live with us | Agree    | 138 (59%)                            | 96 (41%)                      | 1.29 (0.92 to 1.81)          | 1.41 (0.97 to 2.07)            |
|                                                                                                        | Disagree | 239 (65%)                            | 129 (35%)                     | Reference                    | Reference                      |
| In the past 7 days, I have found it hard to keep up with work or other important commitments           | Agree    | 76 (51%)                             | 73 (49%)                      | <b>1.77* (1.21 to 2.58)</b>  | <b>1.85* (1.19 to 2.88)</b>    |
|                                                                                                        | Disagree | 276 (65%)                            | 150 (35%)                     | Reference                    | Reference                      |
| In the past 7 days, people in my household have been getting along well                                | Agree    | 301 (63.5%)                          | 173 (36.5%)                   | 0.81 (0.54 to 1.19)          | 0.80 (0.52 to 1.25)            |



|                                                                                                                               |          |             |             |                                 |                                 |
|-------------------------------------------------------------------------------------------------------------------------------|----------|-------------|-------------|---------------------------------|---------------------------------|
|                                                                                                                               | Disagree | 58% (77)    | 55 (42%)    | Reference                       | Reference                       |
| I am worried about the financial impact of lockdown measures                                                                  | Agree    | 202 (59%)   | 141 (41%)   | 1.37 (0.98 to 1.92)             | 1.28 (0.88 to 1.85)             |
|                                                                                                                               | Disagree | 173 (66%)   | 88 (34%)    | Reference                       | Reference                       |
| Before the school closures, child had extra support at school                                                                 | Agree    | 72 (58%)    | 53 (42%)    | 1.29 (0.86 to 1.94)             | 1.26 (0.80 to 1.98)             |
|                                                                                                                               | Disagree | 261 (64%)   | 149 (36%)   | Reference                       | Reference                       |
| If it were possible, I would feel comfortable sending child to school next week                                               | Agree    | 46 (19%)    | 194 (89%)   | <b>38.89** (24.29 to 62.28)</b> | <b>41.92** (24.52 to 71.67)</b> |
|                                                                                                                               | Disagree | 332 (90%)   | 36 (10%)    | Reference                       | Reference                       |
| There is still too much coronavirus around for schools to be able to reopen safely                                            | Agree    | 290 (80%)   | 74 (20%)    | <b>0.15** (0.10 to 0.21)</b>    | <b>0.14** (0.09 to 0.21)</b>    |
|                                                                                                                               | Disagree | 90 (37%)    | 156 (63%)   | Reference                       | Reference                       |
| When child's school fully reopens, some parents will send their children to school, even if they have symptoms of coronavirus | Agree    | 191 (67%)   | 93 (33%)    | <b>0.66* (0.47 to 0.92)</b>     | <b>0.59* (0.51 to 0.85)</b>     |
|                                                                                                                               | Disagree | 185 (57.5%) | 137 (42.5%) | Reference                       | Reference                       |
| It is impossible for children to maintain 'social distancing' at school                                                       | Agree    | 307 (64%)   | 175 (36%)   | 0.75 (0.50 to 1.11)             | 0.71 (0.46 to 1.10)             |
|                                                                                                                               | Disagree | 72 (57%)    | 55 (45%)    | Reference                       | Reference                       |
| Children will not wash their hands properly at school                                                                         | Agree    | 239 (67%)   | 120 (33%)   | <b>0.63* (0.45 to 0.88)</b>     | <b>0.58* (0.40 to 0.84)</b>     |
|                                                                                                                               | Disagree | 138 (56%)   | 110 (44%)   | Reference                       | Reference                       |
| Staff will not wash their hands properly at school                                                                            | Agree    | 56 (56%)    | 44 (44%)    | 1.35 (0.88 to 2.09)             | 1.45 (0.88 to 2.38)             |
|                                                                                                                               | Disagree | 320 (63%)   | 186 (37%)   | Reference                       | Reference                       |
| Schools will not be able to provide good quality education at the moment                                                      | Agree    | 169 (66.5%) | 85 (33.5%)  | 0.73 (0.52 to 1.02)             | <b>0.65* (0.45 to 0.95)</b>     |
|                                                                                                                               | Disagree | 208 (59%)   | 144 (41%)   | Reference                       | Reference                       |
| School will not be an enjoyable place for child to be at the moment                                                           | Agree    | 237 (76.5%) | 73 (23.5%)  | <b>0.28** (0.20 to 0.40)</b>    | <b>0.28** (0.19 to 0.40)</b>    |
|                                                                                                                               | Disagree | 142 (48%)   | 155 (52%)   | Reference                       | Reference                       |

\*  $p \leq .05$  and formatted bold

\*\*  $p \leq .001$  and formatted bold

† Adjusting for participant gender, age, region, household income, employment status, education level, marital status, participant ethnicity, and the child's gender, school year and school-type.

Decimal places have been used for rounding errors

## Discussion

Most children eligible to attend school did not attend school. Among parents whose children were not eligible to attend, most did not want to send their children to school. Worryingly, we observed patterns that seemed likely to entrench existing educational inequalities, with children from households where parents have lower education achievements, BAME households and households in the North of England being least likely to attend, while children at fee-paying schools were more likely to attend.

Our results suggest that several broad areas determined parental willingness for their child to return to school. First, risk perceptions were crucial. The response "it is too risky" featured highly in parental reasons for not sending children to school, and parents were less likely to want to send the child to school if they felt there "was too much COVID-19 around for schools to open safely." Secondly, parental attitudes reflected perceived risk of transmission of the virus. Parents who worried that children in school would not wash their hands properly and that other parents would send sick children to school were less willing to send their child to school. Children were also more likely to attend school when parents thought their child had had COVID-19 which could indicate the belief their child is immune to further infection.[22] Unexpectedly, children were more likely to attend school when they had a health condition that made them vulnerable to COVID-19 and when a person

1  
2  
3 over 70 years was living in the household. We speculate that this may be because  
4 these circumstances affect the parent's ability to look after the child at home.  
5

6 Poorer perceived child well-being was associated with them being more likely to  
7 attend school. This finding may reflect parental desire to improve their child's well-  
8 being which may have been impacted by the school closure.[23] This was apparent  
9 in reasons parents gave for sending their child to school. It also corresponds with our  
10 finding that a child was more likely to attend school if they were bored at home. In  
11 contrast, parents were less likely to want to send their child to school when they felt  
12 that school would not be enjoyable for the child, and that the child was worried about  
13 COVID-19. As expected,[13] concerns about education also featured highly as a  
14 reason for attendance, while perceptions that schools could not provide good quality  
15 education or that some lessons were not as important were cited as reasons for  
16 absence or partial attendance.  
17  
18  
19

20 Despite most children of key workers not attending school, needing to work was the  
21 most reported reason for school attendance and the school not opening or asking  
22 the child not to attend were the most commonly reported reasons for the child not  
23 being in school. This suggests that work commitments were the main driver for this  
24 group.  
25  
26

27 One troubling finding was that children who had symptoms of COVID-19 in the past  
28 seven days, or whose household members had these symptoms in the past 14 days  
29 were significantly more likely to have gone to school. We do not know if the child  
30 attended school whilst having symptoms or when symptoms were present in the  
31 household (against self-isolation guidance)[24] although amongst adults full  
32 adherence to self-isolation guidelines is known to be poor.[25] However, given that  
33 school closure is specifically designed to reduce the transmission of respiratory  
34 infections in general, it is also possible that this reflects the re-emergence of  
35 transmission of upper respiratory tract infections, or COVID-19 specifically, within the  
36 school environment.[26] It may also reflect increased anxiety or awareness among  
37 parents around COVID-19 symptoms, resulting in higher symptom detection and  
38 reporting.  
39  
40  
41  
42

#### 43 LIMITATIONS

44  
45 Several limitations should be borne in mind for this study. First, we ran many  
46 analyses raising the possibility of Type 1 errors. While we have provided Bonferroni  
47 corrections in the tables for readers who wish to correct for this, this correction in  
48 turn may be overly conservative. Second, we used purposive sampling to broadly  
49 represent parents and children in England. Online polls can be unrepresentative, and  
50 lead to response, and self-reporting bias.[27] However, in line with the reasoning  
51 relating to the use of non-probability samples in the social sciences,[28] we assume  
52 that the associations within our data do generalise to the wider population. Fourth,  
53 the cross-sectional nature of this study limits our ability to draw casual findings. Fifth,  
54 the RCADS sub-scale was used to indicate low well-being but is currently not  
55 validated for children under eight years.[29]  
56  
57  
58

#### 59 CONCLUSION

1  
2  
3 Parents were primarily concerned about the risk of COVID-19. However, they were  
4 more likely to want to send their child back to school if they had concerns about the  
5 impact of the closures on their child's mental well-being and education. Parents will  
6 feel more comfortable in sending their children to school if reassured that school will  
7 be safe, educational and enjoyable.  
8  
9

### 10 **Contributors**

11  
12 All authors contributed to the conceptualisation of the study and approved the final  
13 draft. LW designed the survey, analysed the data and drafted the manuscript. LES  
14 designed the survey, analysed the data and edited the manuscript. RKW edited the  
15 manuscript. RA designed the survey and edited the manuscript. AR designed the  
16 survey and edited the manuscript. SW edited the manuscript. GJR designed the  
17 survey, analysed the data and edited the manuscript.  
18  
19

### 20 **Declarations of interests**

21  
22 We declare no competing interests.  
23  
24

### 25 **Acknowledgments**

26  
27 This study was funded by the Economic and Social Research Council and the  
28 National Institute for Health Research Health Protection Research Unit (NIHR  
29 HPRU) [grant number NIHR200890] in Emergency Preparedness and Response, a  
30 partnership between Public Health England, King's College London and the  
31 University of East Anglia. The views expressed are those of the authors and not  
32 necessarily those of the NIHR, Public Health England or the Department of Health  
33 and Social Care.  
34  
35  
36

### 37 **Role of the funding source**

38  
39 The funders had no role in study design, data collection, data analysis, data  
40 interpretation, or writing of the manuscript. The corresponding author had full access  
41 to all the data and had final responsibility for the decision to submit for publication.  
42  
43  
44  
45  
46  
47  
48  
49  
50  
51  
52  
53  
54  
55  
56  
57  
58  
59  
60

## References

- 1 Prime Minister B Johnson. PM statement on coronavirus: 18 March 2020. Available at: [https://www.gov.uk/government/speeches/pm-statement-on-coronavirus-18-march-2020?utm\\_source=407969fc-4de1-41c8-9571-f6b6ad35efae&utm\\_medium=email&utm\\_campaign=govuk-notifications&utm\\_content=immediate](https://www.gov.uk/government/speeches/pm-statement-on-coronavirus-18-march-2020?utm_source=407969fc-4de1-41c8-9571-f6b6ad35efae&utm_medium=email&utm_campaign=govuk-notifications&utm_content=immediate) Accessed 11 June 2020.
- 2 Prime Minister B Johnson. PM confirms schools, colleges and nurseries on track to begin phased reopening. Available at: <https://www.gov.uk/government/news/pm-confirms-schools-colleges-and-nurseries-on-track-to-begin-phased-reopening> Accessed 11 June 2020.
- 3 HM Government. School Attendance. Available at: <https://www.gov.uk/government/publications/school-attendance> Accessed 8 July 2020.
- 4 Viner RM, Russell SJ, Croker H, et al. School closure and management practices during coronavirus outbreaks including COVID-19: a rapid systematic review. *The Lancet Child & Adolescent Health*. 2020;4(5):397-404 DOI: 10.1016/s2352-4642(20)30095-x
- 5 Keogh-Brown MR, Jensen HT, Edmunds WJ, Smith RD. The impact of Covid-19, associated behaviours and policies on the UK economy: A computable general equilibrium model. *SSM - Population Health*. 2020;[in press]:100651 DOI: 10.1016/j.ssmph.2020.100651
- 6 Boast A, Munro A, Goldstein H. An evidence summary of Paediatric COVID-19 literature. Available at: <https://dontforgetthebubbles.com/evidence-summary-paediatric-covid-19-literature/> Accessed 8 July 2020.
- 7 Zhu Y, Bloxham C, K H, et al. Children are unlikely to have been the primary source of household SARS-CoV-2 infections. 2020; DOI: 10.1101/2020.03.26.20044826v1
- 8 World Health Organization. Report of the WHO-China joint mission on coronavirus disease 2019 (COVID-19). Available at: [https://www.who.int/publications/i/item/report-of-the-who-china-joint-mission-on-coronavirus-disease-2019-\(covid-19\)](https://www.who.int/publications/i/item/report-of-the-who-china-joint-mission-on-coronavirus-disease-2019-(covid-19)) Accessed 8 July 2020.
- 9 Heavey L, Casey G, Kelly C, et al. No evidence of secondary transmission of COVID-19 from children attending school in Ireland, 2020. *Eurosurveillance*. 2020;25(21) DOI: 10.2807/1560-7917.es.2020.25.21.2000903
- 10 Otte Im Kampe E, Lehfeld A-S, Buda S, et al. Surveillance of COVID-19 school outbreaks, Germany, March to August 2020. *Eurosurveillance*. 2020;25(38) DOI: 10.2807/1560-7917.es.2020.25.38.2001645
- 11 England. PH. SARS-CoV-2 infection and transmission in educational settings. Available at: <https://www.gov.uk/government/publications/sars-cov-2-infection-and-transmission-in-educational-settings> Accessed 22 October 2020.
- 12 Royal College of Paediatrics and Child Health. COVID\_19 - talking to children and families about returning to school: guiding principles. Available at: <https://www.rcpch.ac.uk/resources/covid-19-talking-children-families-about-returning-school-guiding-principles> Accessed 9 July 2020.
- 13 Brooks SK, Smith LE, Webster RK, et al. The impact of unplanned school closure on children's social contact: rapid evidence review. *Euro Surveill*. 2020;25(13) DOI: 10.2807/1560-7917.ES.2020.25.13.2000188
- 14 Basurto-Dávila R, Garza R, Meltzer MI, et al. Household economic impact and attitudes toward school closures in two cities in Argentina during the 2009 influenza

- 1  
2  
3 A (H1N1) pandemic. *Influenza and Other Respiratory Viruses*. 2013;7(6):1308-15  
4 DOI: 10.1111/irv.12054  
5  
6 15 Effler PV, Carcione D, Giele C, et al. Household responses to pandemic (H1N1)  
7 2009-related school closures, Perth, Western Australia. *Emerg Infect Dis*.  
8 2010;16(2):205-11 DOI: 10.3201/eid1602.091372  
9  
10 16 van Gemert C, McBryde ES, Bergeri I, et al. Description of social contacts among  
11 student cases of pandemic influenza during the containment phase, Melbourne,  
12 Australia, 2009. *Western Pac Surveill Response J*. 2018;9(5 Suppl 1):27-34 DOI:  
13 10.5365/wpsar.2018.9.5.003  
14  
15 17 Lee J. Mental health effects of school closures during COVID-19. *The Lancet*  
16 *Child & Adolescent Health*. 2020;4(6):421 DOI: 10.1016/s2352-4642(20)30109-7  
17  
18 18 Smith LE, Woodland L, Amlôt R, et al. A cross-sectional survey of parental  
19 perceptions of COVID-19 related hygiene measures within schools and adherence to  
20 social distancing in journeys to and from school. *BMJ Paediatrics Open*. 2020;4(1)  
21 DOI: 10.1136/bmjpo-2020-000825  
22  
23 19 HM Government. Schools, pupils and their characteristics: Academic Year  
24 2019/20. Available at: [https://explore-education-statistics.service.gov.uk/find-](https://explore-education-statistics.service.gov.uk/find-statistics/school-pupils-and-their-characteristics)  
25 [statistics/school-pupils-and-their-characteristics](https://explore-education-statistics.service.gov.uk/find-statistics/school-pupils-and-their-characteristics) Accessed 25 June 2020.  
26  
27 20 Chorpita BF, Yim L, Moffitt C, et al. Assessment of symptoms of DSM-IV anxiety  
28 and depression in children: a revised child anxiety and depression scale. *Behaviour*  
29 *Research and Therapy*. 2000;38(8):835-55 DOI: 10.1016/s0005-7967(99)00130-8  
30  
31 21 IBM Corp. IBM SPSS Statistics for Windows. 26.0 2019  
32  
33 22 Smith LE, Mottershaw AL, Egan M, et al. The impact of believing you have had  
34 COVID-19 on self-reported behaviour: Cross-sectional survey. *PLOS ONE*.  
35 2020;15(11):e0240399 DOI: 10.1371/journal.pone.0240399  
36  
37 23 Idoiaga M, Berasategi S, Dosil S, Eiguren M. Struggling to breathe: a qualitative  
38 study of children's wellbeing during lockdown in Spain. *Psychology & Health*. 2020:1-  
39 16 DOI: 10.1080/08870446.2020.1804570  
40  
41 24 HM Government. Protective measures for out-of-school settings during the  
42 coronavirus (COVID-19) outbreak. Available at:  
43 [https://www.gov.uk/government/publications/protective-measures-for-holiday-or-](https://www.gov.uk/government/publications/protective-measures-for-holiday-or-after-school-clubs-and-other-out-of-school-settings-for-children-during-the-coronavirus-covid-19-outbreak/protective-measures-for-out-of-school-settings-during-the-coronavirus-covid-19-outbreak)  
44 [after-school-clubs-and-other-out-of-school-settings-for-children-during-the-](https://www.gov.uk/government/publications/protective-measures-for-holiday-or-after-school-clubs-and-other-out-of-school-settings-for-children-during-the-coronavirus-covid-19-outbreak/protective-measures-for-out-of-school-settings-during-the-coronavirus-covid-19-outbreak)  
45 [coronavirus-covid-19-outbreak/protective-measures-for-out-of-school-settings-](https://www.gov.uk/government/publications/protective-measures-for-holiday-or-after-school-clubs-and-other-out-of-school-settings-for-children-during-the-coronavirus-covid-19-outbreak/protective-measures-for-out-of-school-settings-during-the-coronavirus-covid-19-outbreak)  
46 [during-the-coronavirus-covid-19-outbreak](https://www.gov.uk/government/publications/protective-measures-for-holiday-or-after-school-clubs-and-other-out-of-school-settings-for-children-during-the-coronavirus-covid-19-outbreak/protective-measures-for-out-of-school-settings-during-the-coronavirus-covid-19-outbreak) Accessed 8 July 2020.  
47  
48 25 Smith LE, Amlôt R, Lambert H, et al. Factors associated with adherence to self-  
49 isolation and lockdown measures in the UK: a cross-sectional survey. *Public Health*.  
50 2020;187:41-52 DOI: 10.1016/j.puhe.2020.07.024  
51  
52 26 Panovska-Griffiths J, Kerr CC, Stuart RM, et al. Determining the optimal strategy  
53 for reopening schools, the impact of test and trace interventions, and the risk of  
54 occurrence of a second COVID-19 epidemic wave in the UK: a modelling study. *The*  
55 *Lancet Child & Adolescent Health*. 2020; DOI: 10.1016/s2352-4642(20)30250-9  
56  
57 27 Epstein WM. Response bias in opinion polls and American social welfare. *The*  
58 *Social Science Journal*. 2006;43(1):99-110 DOI: 10.1016/j.soscij.2005.12.010  
59  
60 28 Kohler U. Possible Uses of Nonprobability Sampling for the Social Sciences.  
*Survey Methods: Insights from the Field*. Available at:  
<https://surveyinsights.org/?p=10981> Accessed 29 July 2020.

29 Ebesutani C, Chorpita BF, Higa-McMillan CK, et al. A Psychometric Analysis of  
the Revised Child Anxiety and Depression Scales—Parent Version in a School  
Sample. *Journal of Abnormal Child Psychology*. 2011;39(2):173-85 DOI:  
10.1007/s10802-010-9460-8

1  
2  
3 30 Chorpita BF. Child FIRST - Focus on innovation and redesign in systems and  
4 treatment. Available at: <https://www.childfirst.ucla.edu/resources/> Accessed 6 July  
5 2020.  
6  
7  
8  
9  
10  
11  
12  
13  
14  
15  
16  
17  
18  
19  
20  
21  
22  
23  
24  
25  
26  
27  
28  
29  
30  
31  
32  
33  
34  
35  
36  
37  
38  
39  
40  
41  
42  
43  
44  
45  
46  
47  
48  
49  
50  
51  
52  
53  
54  
55  
56  
57  
58  
59  
60

Confidential: For Review Only

## SUPPLEMENTARY MATERIAL

**Full Survey Material**

D1. Please type your age on your last birthday: [number]

**Screenout if D1 = <18**

Q1. Which country do you live in? [single code]

- a. England
- b. Scotland
- c. Wales
- d. Northern Ireland
- e. Outside of the UK

**Screenout if Q1 = b-e**

Q2. Which region do you live in? [single code]

- a. East Midlands
- b. East of England
- c. London
- d. North East
- e. North West
- f. South East
- g. South West
- h. West Midlands
- i. Yorkshire and the Humber

Q3. Are you the parent or guardian of a child who usually attends school (that is, before the coronavirus outbreak occurred) and who lives with you? [single code]

- a. Yes
- b. No

**Screenout if Q3 = b**

Q4. Which of the following age groups do your children who live with you fall into? Please tick any that apply. [multi code]

- a. 0-3
- b. 4-11
- c. 12-18
- d. None of the above [exclusive]

**Screenout if b OR c not selected**

Q5. The Government has categorised some people as “critical workers” or “key workers.” For example, this includes people working in health and social care, education, key public services, transport, food distribution and other jobs. As far as you know, are you, or a spouse/partner, a “critical” or “key” worker? Please tick any that apply. [multi code]

- a. Yes, me
- b. Yes, spouse/partner
- c. No [exclusive]
- d. Don't know [exclusive]

IF Q4 = b

Q6. You stated that you have at least one child aged 4-11 who lives with you. Are any of your children who live with you in the following school years? Please tick any that apply. [multi code]

- a. Reception
- b. Year 1

- 1  
2  
3 c. Year 6  
4 d. I have no children in the school years listed above [exclusive]  
5

6 IF 2 or more options are selected at Q6

7 Q7. Thinking only about your children in Reception, Year 1 or Year 6, who live with you, which child had the  
8 most recent birthday? If the most recent birthday was shared by more than one child (e.g. twins, or children born  
9 on the same day in different years), please answer the following questions thinking about one of these children  
10 only. [single code]  
11

- 12 a. My child in Reception  
13 b. My child in Year 1  
14 c. My child in Year 6  
15

16 ONLY SHOW OPTIONS SELECTED AT Q6

17 IF Q6 = a-c

18 Q8. Can you please tell us how old that child is? [single code]  
19

- 20 a. 4  
21 b. 5  
22 c. 6  
23 d. 7  
24 e. 8  
25 f. 9  
26 g. 10  
27 h. 11  
28

29 IF Q6 = a-c

30 Q9. Can you please tell us if that child is a: [single code]  
31

- 32 a. Boy  
33 b. Girl  
34

35 IF Q6 = a-c

36 Q10. Can you please tell us the type of school that child usually attends? [single code]  
37

- 38 a. Fee-paying  
39 b. State-funded school  
40 c. Don't know  
41

42 IF Q6 = a-c

43 Q11A. Thinking about that child, have they attended school at all in the past 7 days? [single code]  
44

- 45 a. Yes, on 5 days  
46 b. Yes, on 1 to 4 days  
47 c. No  
48 d. Don't know  
49

50 IF Q11A = a/b

51 Q12A. You said that your child has attended school on at least one day in the past week. For which reasons did  
52 you send your child to school? Please tick any that apply [multi code]:  
53

54 RANDOMISE ORDER OF STATEMENTS, anchor other to bottom

- 55 a) It is compulsory for my child to attend  
56 b) I need to work  
57 c) I have non-work commitments I need to meet  
58 d) My child's education will benefit from being at school  
59 e) My child will benefit from seeing their friends  
60 f) Having my child at home is a strain



- g) I don't believe my child will be at risk at school
- h) My child wants to go to school
- i) I think friends, family or other parents will judge me if I don't send my child to school
- j) It reduces costs at home
- k) Other reason [write in]

IF Q11A = b

Q13A. You said that your child has not attended school every day in the past week. For which reasons are they attending only part-time? Please tick any that apply [multi code]:

RANDOMISE ORDER OF STATEMENTS, anchor other to bottom

- a) I am using it as childcare and I only need them in part time
- b) It is less risky for them to be in part-time
- c) The school only offers for them to be in part-time
- d) I am only sending them in on days where the lessons are important
- e) I am only sending them in on days when their friends are in
- f) I am only sending them in on days when I can arrange transport
- g) They only live with me part time
- h) I started sending them in, but have now changed my mind
- i) They have developed coronavirus symptoms (cough or fever, or change in sense of taste or smell)
- j) My child developed symptoms of a different illness
- k) Someone else in the family developed coronavirus symptoms (cough or fever, or change in sense of taste or smell)
- l) Someone else at the school developed coronavirus symptoms (cough or fever, or change in sense of taste or smell)
- m) Other reason [write in]

IF Q11A = c

Q14A. You said that your child has not attended school in the past week. For which reasons did you not send your child to school? Please tick any that apply [multi code]:

RANDOMISE ORDER OF STATEMENTS, anchor other to bottom

- a) Someone in my household is clinically vulnerable to coronavirus
- b) I think it is too risky for my child to attend school at the moment
- c) The school is not open
- d) The school has asked my child not to attend
- e) My child doesn't want to go
- f) I think friends, family or other parents will judge me if I send my child to school
- g) I think they will get a better education at home than at school at the moment
- h) Being at school will be stressful for my child
- i) My child's friends will not be at school
- j) I have another child who can't go to school
- k) I can't arrange transport to get them to school
- l) There's no point, schools will shut again soon anyway
- m) They have developed coronavirus symptoms (cough or fever, or change in sense of taste or smell)
- n) My child developed symptoms of a different illness
- o) Someone else in the family developed coronavirus symptoms (cough or fever, or change in sense of taste or smell)
- p) Someone else at the school developed coronavirus symptoms (cough or fever, or change in sense of taste or smell)
- q) Other reason [write in]

IF Q11A = a/b

Q15A. In this question we are interested in things that happened on the most recent day that your child went to school. Please remember that this survey is anonymous – please be honest in your answers. Please tick any that apply. [multi code]

RANDOMISE ORDER OF STATEMENTS, anchor none of these to bottom

- 1  
2  
3 a) Either on the way to or from school, or at the school gates, I had physical contact with someone  
4 that I don't live with  
5 b) Either on the way to or from school, or at the school gates, I was within 1 metre of someone that I  
6 don't live with for 1 minute or longer  
7 c) Either on the way to or from school, or at the school gates, I was between 1 and 2 metres of  
8 someone that I don't live with for 15 minutes or longer  
9 d) My child used public transport to get to or from school.  
10 e) My child shared a lift in a car with another family to get to or from school.  
11 f) I gave a lift in a car to a child from another family to get them to or from school.  
12 g) My child washed their hands as soon as they got home from school.  
13 h) My child had a shower or bath as soon as they got home from school.  
14 i) I washed my child's clothes after they got home from school.  
15 j) None of these [exclusive]

16 IF Q11A = a/b

17  
18 Q16A. Thinking about the facilities or procedures at your child's school. Which of the following, if any, are  
19 actually happening as far as you are aware?

20 Please tick all that apply [multi code]

21  
22 RANDOMISE ORDER OF STATEMENTS, anchor none of these to bottom

- 23  
24 a) There are hand washing facilities or hand gel dispensers at the entrance to the school that are working  
25 b) There are hand washing facilities or hand gel dispensers at the entrance to the classrooms that are  
26 working  
27 c) Children's hand washing or hand gel use is being monitored at school  
28 d) My child's class sizes is now 15 or fewer  
29 e) Children need to take in their own food and snacks  
30 f) Children are having their temperature checked on the way in  
31 g) The school has used markings or barriers to help children keep their distance from each other  
32 h) None of these are happening at my child's school [exclusive]

33 Q17. For the next series of questions, we would like you to think about one of your children who usually goes to  
34 school (that is, before the coronavirus outbreak occurred). If you have more than one child who usually went to  
35 school, then please answer about your child with the most recent birthday. If the most recent birthday was  
36 shared by more than one child (e.g. twins, or children born on the same day in different years), please answer  
37 the following questions thinking about one of these children only.  
38

39 Firstly, can you tell us the first name of your child. This is just so we can refer to them throughout the survey.  
40 You can give a fake name if you would prefer. [open]

41 \_\_\_\_\_  
42

43 Q18. How old is [CHILD]? [single code]

- 44  
45 a. 4  
46 b. 5  
47 c. 6  
48 d. 7  
49 e. 8  
50 f. 9  
51 g. 10  
52 h. 11  
53 i. 12  
54 j. 13  
55 k. 14  
56 l. 15  
57 m. 16  
58 n. 17  
59 o. 18  
60

1  
2  
3 Q19. What year is [CHILD] in at school [single code]  
4

- 5 a. Reception  
6 b. Year 1  
7 c. Year 2  
8 d. Year 3  
9 e. Year 4  
10 f. Year 5  
11 g. Year 6  
12 h. Year 7  
13 i. Year 8  
14 j. Year 9  
15 k. Year 10  
16 l. Year 11  
17 m. Year 12  
18 n. Year 13

19 Q20. Is [CHILD] a: [single code]

- 20 a. Boy  
21 b. Girl  
22

23 Q21. What type of school does [CHILD] normally attend? [single code]

- 24 a. Fee-paying  
25 b. State-funded school  
26 c. Don't know  
27

28 If Q5 = a/b AND [Q4 ≠ b or Q6 = d]

29 Q11B. Has [CHILD] attended school at all in the past 7 days? [single code]

- 30 a. Yes, on 5 days  
31 b. Yes, on 1 to 4 days  
32 c. No  
33 d. Don't know  
34

35 IF Q11B = a/b

36 Q12B. You said that [CHILD] has attended school on at least one day in the past week. For which reasons did  
37 you send [CHILD] to school? Please tick any that apply [multi code]:  
38

39 RANDOMISE ORDER OF STATEMENTS, anchor other to bottom  
40

- 41 a) It is compulsory for my child to attend  
42 b) I need to work  
43 c) I have non-work commitments I need to meet  
44 d) My child's education will benefit from being at school  
45 e) My child will benefit from seeing their friends  
46 f) Having my child at home is a strain  
47 g) I don't believe my child will be at risk at school  
48 h) My child wants to go to school  
49 i) I think friends, family or other parents will judge me if I don't send my child to school  
50 j) It reduces costs at home  
51 k) Other reason [write in]  
52

53 IF Q11B = b

54 Q13B. You said that [CHILD] has not attended school every day in the past week. For which reasons is  
55 [CHILD] attending only part-time? Please tick any that apply [multi code]:  
56

57 RANDOMISE ORDER OF STATEMENTS, anchor other to bottom  
58

- 59 a) I am using it as childcare and I only need them in part time  
60 b) It is less risky for them to be in part-time

- c) The school only offers for them to be in part-time
- d) I am only sending them in on days where the lessons are important
- e) I am only sending them in on days when their friends are in
- f) I am only sending them in on days when I can arrange transport
- g) They only live with me part time
- h) I started sending them in, but have now changed my mind
- i) They have developed coronavirus symptoms (cough or fever, or change in sense of taste or smell)
- j) My child developed symptoms of a different illness
- k) Someone else in the family developed coronavirus symptoms (cough or fever, or change in sense of taste or smell)
- l) Someone else at the school developed coronavirus symptoms (cough or fever, or change in sense of taste or smell)
- m) Other reason [write in]

IF Q11B = c

Q14B. You said that [CHILD] has not attended school in the past week. For which reasons did you not send [CHILD] to school? Please tick any that apply [multi code]:

RANDOMISE ORDER OF STATEMENTS, anchor other to bottom

- a) Someone in my household is clinically vulnerable to coronavirus
- b) I think it is too risky for my child to attend school at the moment
- c) The school is not open
- d) The school has asked my child not to attend
- e) My child doesn't want to go
- f) I think friends, family or other parents will judge me if I send my child to school
- g) I think they will get a better education at home than at school at the moment
- h) Being at school will be stressful for my child
- i) My child's friends will not be at school
- j) I have another child who can't go to school
- k) I can't arrange transport to get them to school
- l) There's no point, schools will shut again soon anyway
- m) They have developed coronavirus symptoms (cough or fever, or change in sense of taste or smell)
- n) My child developed symptoms of a different illness
- o) Someone else in the family developed coronavirus symptoms (cough or fever, or change in sense of taste or smell)
- p) Someone else at the school developed coronavirus symptoms (cough or fever, or change in sense of taste or smell)
- q) Other reason [write in]

IF Q11B = a/b

Q15B. In this question we are interested in things that happened on the most recent day that [CHILD] went to school. Please remember that this survey is anonymous – please be honest in your answers. Please tick any that apply. [multi code]

RANDOMISE ORDER OF STATEMENTS, anchor none of these to bottom

- a) Either on the way to or from school, or at the school gates, I had physical contact with someone that I don't live with
- b) Either on the way to or from school, or at the school gates, I was within 1 metre of someone that I don't live with for 1 minute or longer
- c) Either on the way to or from school, or at the school gates, I was between 1 and 2 metres of someone that I don't live with for 15 minutes or longer
- d) My child used public transport to get to or from school.
- e) My child shared a lift in a car with another family to get to or from school.
- f) I gave a lift in a car to a child from another family to get them to or from school.
- g) My child washed their hands as soon as they got home from school.
- h) My child had a shower or bath as soon as they got home from school.
- i) I washed my child's clothes after they got home from school.
- j) None of these [exclusive]

1  
2  
3 IF Q11B = a/b  
4

5 Q16B. Thinking about the facilities or procedures at [CHILD]'s school. Which of the following, if any, are  
6 actually happening as far as you are aware? Please tick any that apply. [multi code]  
7

8 RANDOMISE ORDER OF STATEMENTS, anchor none of these to bottom  
9

- 10 a) There are hand washing facilities or hand gel dispensers at the entrance to the school that are working  
11 b) There are hand washing facilities or hand gel dispensers at the entrance to the classrooms that are  
12 working  
13 c) Children's hand washing or hand gel use is being monitored at school  
14 d) My child's class size is now 15 or fewer  
15 e) Children need to take in their own food and snacks  
16 f) Children are having their temperature checked on the way in  
17 g) The school has used markings or barriers to help children keep their distance from each other  
18 h) None of these are happening at [CHILD]'s school [exclusive]

19 Q22. Does [CHILD] have special educational needs? [single code]  
20

- 21 - Yes  
22 - No  
23 - Don't know / prefer not to say  
24

25 Q23. In the past 7 days, how many times, if at all, has [CHILD] left your home for each of the following  
26 reasons? [multi code]  
27

- 28 a) To go to the shops for groceries, toiletries or medicines  
29 b) To go to the shops for other items  
30 c) For exercise  
31 d) For a medical need (e.g. an outpatient appointment)  
32 e) To go to school  
33 f) To provide help to someone else  
34 g) To meet friends  
35 h) To meet family members who don't live with you  
36 i) For another reason

37 Q24. In the past 7 days, have you done the following, because of the risk from coronavirus:  
38

39 SCALE

- 40 - Yes  
41 - No  
42

43 STATEMENTS – RANDOMISE  
44

- 45 a. Washed your hands thoroughly and regularly  
46 b. Stayed 2m (3 steps) away from people you do not live with when outside your home  
47 c. Washed your clothes when you have returned home  
48 d. Washed [CHILD]'s clothes when she/ he has returned home  
49 e. Used tissues or clothing to touch door handles or other objects when outside  
50 f. Cleaned or disinfected items you have brought into the home, such as groceries or parcels  
51 g. Left items that you have brought into the home for 24 hours or more before using them, to kill any  
52 virus on them  
53 h. Covered your face or used a face mask when out and about  
54 i. Covered [CHILD]'s face or given her/him a face mask when out and about  
55 j. Worn protective gloves when out and about  
56 k. Made [CHILD] wear protective gloves when out and about  
57  
58  
59  
60

Q25. We are interested in how many people [CHILD] has had close contact with in the past 24 hours. By close contact we mean closer than 2 meters, for fifteen minutes or more. Please remember, this survey is anonymous so please be honest.

In the past 24 hours, how many people in the following categories has [CHILD] had close contact with: [multi code]

- a. Someone [CHILD] lives with
- b. Friends or other children who [CHILD] does not live with
- c. A family member aged under 70 who [CHILD] does not live with
- d. A family member aged over 70 who [CHILD] does not live with
- e. A babysitter, nanny or childminder
- f. Other children, not already reported above
- g. Other adults, not already reported above

Q26. Did [CHILD] attend school in the past 24 hours? [single code]

- a. Yes
- b. No

#### RANDOMISE ORDER OF Q27a AND Q27b SHOWN TO EACH RESPONDENT

Q27a. How much, if at all, do you agree or disagree with the following statements:

STATEMENTS (randomise order):

- a) If [CHILD] goes out, she/he is likely to catch coronavirus
- b) If [CHILD] goes out, she/he is likely to bring coronavirus back into our home
- c) [CHILD] is keeping up with her/his schoolwork
- d) I feel confident helping [CHILD] with her/his schoolwork
- e) I feel supported by [CHILD's] school
- f) I have access to all the resources that [CHILD] needs to do her/his schoolwork
- g) During lockdown, [CHILD] has learned about important things she/he wouldn't normally learn at school.
- h) In the past 7 days, [CHILD] has been bored

SCALE

- Strongly agree
- Tend to agree
- Neither agree nor disagree
- Tend to disagree
- Strongly disagree
- Not applicable

Q27b. How much, if at all, do you agree or disagree with the following statements:

STATEMENTS (randomise order):

- a) In the past 7 days, my household has had a regular structure to the day
- b) In the past 7 days, [CHILD] has kept in touch with her/his friends
- c) [CHILD] is worried about coronavirus
- d) In the past 7 days, [CHILD] has felt upset about not seeing other family members who do not live with us
- e) In the past 7 days, I have found it hard to keep up with work or other important commitments
- f) In the past 7 days, people in my household have been getting along well
- g) I am worried about the financial impact of lockdown measures
- h) Before the school closures, [CHILD] had extra support at school

SCALE

- Strongly agree
- Tend to agree

- Neither agree nor disagree
- Tend to disagree
- Strongly disagree
- Not applicable

Q28. To what extent, if at all, do you agree or disagree with the following statements?

RANDOMISE ORDER OF STATEMENTS

- a) If it were possible, I would feel comfortable sending [CHILD] to school next week.
- b) If it were possible, I would want to send [CHILD] to school next week.
- c) There is still too much coronavirus around for schools to be able to reopen safely
- d) When [CHILD's] school fully reopens, some parents will send their children to school, even if they have symptoms of coronavirus
- e) It is impossible for children to maintain 'social distancing' at school
- f) Children will not wash their hands properly at school
- g) Staff will not wash their hands properly at school
- h) Schools will not be able to provide good quality education at the moment
- i) School will not be an enjoyable place for [CHILD] to be at the moment

SCALE

- Strongly agree
- Tend to agree
- Neither agree nor disagree
- Tend to disagree
- Strongly disagree
- Not applicable

Q29A. Has [CHILD] had any of the following symptoms in the past 7 days? Please tick any that apply, no matter where you think the symptoms came from, and even if the symptoms were mild. [multi code]

RANDOMISE ORDER OF STATEMENTS, anchor "none of these" and "don't know" to bottom

- New, continuous cough
- High temperature / fever
- Runny nose
- Diarrhoea
- Nausea / feeling sick
- Vomiting
- Sneezing
- Loss of appetite
- Loss of sense of smell (fully or partial)
- Loss of taste
- None of these
- Don't know

Q29B. Have you, or anyone else in your household (excluding [CHILD]) had any of the following symptoms in the past 14 days? Please tick any that apply, no matter where you think the symptoms came from, and even if the symptoms were mild. [multi code]

RANDOMISE ORDER OF STATEMENTS, anchor "none of these" and "don't know" to bottom

- New, continuous cough
- High temperature / fever
- Runny nose
- Diarrhoea
- Nausea / feeling sick
- Vomiting
- Sneezing
- Loss of appetite
- Loss of sense of smell (fully or partial)

- Loss of taste
- None of these
- Don't know

Q30. Do you know if [CHILD] has had, or currently has, coronavirus? (Please select the option that BEST applies) [single code]

- a) They have definitely had it or definitely have it now
- b) They have probably had it or probably have it now
- c) They have probably not had it and probably don't have it now
- d) They have definitely not had it and definitely don't have it now

#### **RANDOMISE ORDER OF Q31a AND Q31b SHOWN TO EACH RESPONDENT**

Q31a. Please tell us how often each of these things happen to [CHILD]. There are no right or wrong answers.

##### *SCALE*

- *Never*
- *Sometimes*
- *Often*
- *Always*

##### STATEMENTS

- My child worries about things
- My child worries that something awful will happen to someone in the family
- My child worries that bad things will happen to him/her
- My child feels sad or empty
- Nothing is much fun for my child anymore
- My child has trouble sleeping
- My child has problems with his/her appetite
- My child has no energy for things

Q31b. Please tell us how often each of these things happen to [CHILD]. There are no right or wrong answers.

##### *SCALE*

- *Never*
- *Sometimes*
- *Often*
- *Always*

##### STATEMENTS

- My child worries that something bad will happen to him/her
- My child worries about what is going to happen
- My child thinks about death
- My child is tired a lot
- My child cannot think clearly
- My child feels worthless
- My child feels like he/she doesn't want to move
- My child feels restless

Q32. Thinking about next flu season (September 2020 – March 2021). During this time, you may be invited to vaccinate [CHILD] against flu. All primary school, but not secondary school children, are eligible for the child flu vaccine. For the following questions, please think about the next flu season.

For each of the following statements, please tell us to what extent, if at all, you agree or disagree:

I want [CHILD] to be vaccinated for flu next year (2020/21)

- Strongly agree
- Agree
- Neither agree nor disagree



- 1
- 2
- 3 - Disagree
- 4 - Strongly disagree
- 5 - Not applicable, [CHILD] will be in secondary school in next school year (2020/21)
- 6
- 7

IF Q32 = a-e

Q33 I intend [CHILD] to be vaccinated for flu next year (2020/21)

- 10 - Strongly agree
- 11 - Agree
- 12 - Neither agree nor disagree
- 13 - Disagree
- 14 - Strongly disagree
- 15 - Not applicable, [CHILD] will be in secondary school in next school year (2020/21)

Thinking now about yourself...

Q34. Over the last 2 weeks, how often have you been bothered by the following problems?

SCALE

- 21 - Not at all
- 22 - Several days
- 23 - More than half the days
- 24 - Nearly every day
- 25

STATEMENTS

- 27 - Feeling nervous, anxious or on edge
- 28 - Not being able to stop or control worrying
- 29 - Little interest or pleasure in doing things
- 30 - Feeling down, depressed, or hopeless
- 31
- 32

And finally, the following questions ask for some more information about you and your household.

D2. Which gender do you identify yourself with? [single code]

- 36 - Male
- 37 - Female
- 38 - Prefer to self-describe
- 39 - Prefer not to say
- 40

D3. What is your employment status? [single code]

- 42 a. Full time paid job (31+ hours)
- 43 b. Part time paid job (<31 hours)
- 44 c. Doing paid work on a self-employed basis or within your own business
- 45 d. Employed, but currently furloughed
- 46 e. Student / On a government training programme (Nation Traineeship/Modern Apprenticeship)
- 47 f. Out of work (6 months or less)
- 48 g. Out of work (more than 6 months)
- 49 h. Looking after home / Homemaker
- 50 i. Retired
- 51 j. Disabled OR Long-term sick
- 52 k. Unpaid work for a business, community or voluntary organisation
- 53 l. Prefer not to say

If answer a/b/c to D3

D4. Are you currently working from home? [single code]

- 57 - Yes
- 58 - No
- 59
- 60

1  
2  
3 D5. What is the highest level of educational qualification you have received? [single code]  
4

- 5 a. PhD/Doctor  
6 b. Master's  
7 c. Bachelor's Degree or equivalent (Such as a NVQ level 5)  
8 d. Higher education (Such as a HND or a NVQ level 4)  
9 e. A level or equivalent (Such as Scottish Highers or NVQ level 3)  
10 f. GCSE and below (Such as O level or an RSA Diploma)  
11 g. Other qualifications (Such as NVQ level 1)  
12 h. No qualifications  
13 i. Prefer not to say

14 D6. Which of the following income brackets best represents your household income, before tax deductions for  
15 income tax, National Insurance etc? [single code]  
16

- 17 a. Less than £5,000  
18 b. £5,000-£9,999  
19 c. £10,000-£14,999  
20 d. £15,000-£19,999  
21 e. £20,000-£24,999  
22 f. £25,000-£29,999  
23 g. £30,000-£34,999  
24 h. £35,000-£39,999  
25 i. £40,000-£44,999  
26 j. £45,000-£49,999  
27 k. £50,000-£59,999  
28 l. £60,000-£69,999  
29 m. £70,000-£84,999  
30 n. £85,000-£99,999  
31 o. More than £100,000  
32 p. Prefer not to say

33 D7. What is your current marital or civil partnership status? [single code]

- 34 a. Single (i.e. never married and never registered as a same sex civil-partnership)  
35 b. Co-habiting with partner (but never married or been in a civil partnership)  
36 c. Civil partnership  
37 d. Married  
38 e. Separated, but still legally married / in a civil partnership  
39 f. Divorced / Civil partnership legally dissolved  
40 g. Widowed / Surviving partner from a same-sex civil partnership

41 D8. Which of the following categories would best describe your ethnicity? [single code]  
42

- 43 a. English/Welsh/Scottish/Northern Irish/British  
44 b. Irish  
45 c. Gypsy or Irish Traveller  
46 d. Other  
47 e. White and Black Caribbean  
48 f. White and Black African  
49 g. White and Asian  
50 h. Other  
51 i. Indian  
52 j. Pakistani  
53 k. Bangladeshi  
54 l. Chinese  
55 m. Other  
56 n. Caribbean  
57 o. African  
58 p. Other  
59 q. Arab  
60 r. Any other (please specify)  
s. Prefer not to say

1  
2  
3 D10. How many children in each age group live in your household? [number list]  
4

- 5 - 0-3
- 6 - 4-10
- 7 - 11-15
- 8 - 16-18

9 Allow numerical input for each age group  
10

11 D11. Do you live with anyone over the age of 70 years? [single code]  
12

- 13 a. Yes
- 14 b. No

15 D12. Including yourself, how many people live in your household? [single code]  
16

- 17 a. 2
- 18 b. 3
- 19 c. 4
- 20 d. 5
- 21 e. 6
- 22 f. 7
- 23 g. 8
- 24 h. 9
- 25 i. 10 or more

26 D9. Do any of the following have a medical condition than might make them particularly vulnerable to  
27 coronavirus?  
28

29 SCALE

- 30 - Yes
- 31 - No
- 32 - Don't know

33 STATEMENTS

- 35 a. Yourself
- 36 b. [CHILD]
- 37 c. Anyone else you live with [show if D12 = b-i]

39 D13. [Record number] How many bedrooms does your home have?  
40

41 D14. [Multi code] Which of the following do you have access to at your home:  
42

- 43 a) A garden
- 44 b) A patio / terrace
- 45 c) A balcony
- 46 d) Another form of outdoor space
- 47 e) No outdoor space

48 Thank you for completing this survey. If you have any concerns about your child's mental health, please click  
49 [here](#).  
50  
51  
52  
53  
54  
55  
56  
57  
58  
59  
60

### Recoding of variables

We recoded all statement answers into binary variables by grouping “strongly agree” and “tend to agree”, versus “neither agree nor disagree”, “tend to disagree” and “strongly disagree”.

We created two binary variables to indicate whether the child, and someone in the household (other than the child) had a health condition that might make them particularly vulnerable to COVID-19.

We created two binary variables to indicate presence of COVID-19 symptoms in the child, and someone else in the household. We defined presence of COVID-19 symptoms as experiencing a “new, continuous cough”, “high temperature / fever”, “loss of sense of smell (fully or partial)”, or “loss of taste”. We coded a binary variable for the parent’s perception of whether the child had had COVID-19 by grouping together “they have definitely had it or definitely have it now” and “they have probably had it or probably have it now”.

We created a binary variable to indicate low well-being in the child. We assigned a value against each answer from 0 (“never”) to 3 (“always”) on the GAD and MDD RCADS sub-scales and created a total score for each sub-scale. We then turned each total score into a t-score, a method used to normalise RCADS scores within the population, by child’s age and gender.[20,30] We used the same process for reception to year three as for year four. We used a t-score cut off of 65 or above on either GAD or MDD sub-scales to indicate low well-being.

For all variables, we coded the responses “don’t know”, “not applicable”, “prefer not to say” and “prefer to self-describe” as missing data.

# BMJ Paediatrics Open

## Why did some parents not send their children back to school following school closures during the COVID-19 pandemic: a cross-sectional survey

|                               |                                                                                                                                                                                                                                                                                                                    |
|-------------------------------|--------------------------------------------------------------------------------------------------------------------------------------------------------------------------------------------------------------------------------------------------------------------------------------------------------------------|
| Journal:                      | <i>BMJ Paediatrics Open</i>                                                                                                                                                                                                                                                                                        |
| Manuscript ID                 | bmjpo-2020-001014.R1                                                                                                                                                                                                                                                                                               |
| Article Type:                 | Original research                                                                                                                                                                                                                                                                                                  |
| Date Submitted by the Author: | 29-Mar-2021                                                                                                                                                                                                                                                                                                        |
| Complete List of Authors:     | Woodland, Lisa; Weston Education Centre<br>Smith, Louise; King's College London<br>Webster, Rebecca K; The University of Sheffield<br>Amlôt, Richard; Public Health England<br>Rubin, Antonia; Weald of Kent Grammar School<br>Wessely, Simon; Institute of Psychiatry Psychology and Neuroscience<br>Rubin, James |
| Keywords:                     | COVID-19, Psychology                                                                                                                                                                                                                                                                                               |
|                               |                                                                                                                                                                                                                                                                                                                    |

SCHOLARONE™  
Manuscripts

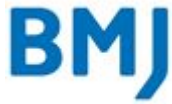

I, the Submitting Author has the right to grant and does grant on behalf of all authors of the Work (as defined in the below author licence), an exclusive licence and/or a non-exclusive licence for contributions from authors who are: i) UK Crown employees; ii) where BMJ has agreed a CC-BY licence shall apply, and/or iii) in accordance with the terms applicable for US Federal Government officers or employees acting as part of their official duties; on a worldwide, perpetual, irrevocable, royalty-free basis to BMJ Publishing Group Ltd ("BMJ") its licensees and where the relevant Journal is co-owned by BMJ to the co-owners of the Journal, to publish the Work in this journal and any other BMJ products and to exploit all rights, as set out in our [licence](#).

The Submitting Author accepts and understands that any supply made under these terms is made by BMJ to the Submitting Author unless you are acting as an employee on behalf of your employer or a postgraduate student of an affiliated institution which is paying any applicable article publishing charge ("APC") for Open Access articles. Where the Submitting Author wishes to make the Work available on an Open Access basis (and intends to pay the relevant APC), the terms of reuse of such Open Access shall be governed by a Creative Commons licence – details of these licences and which [Creative Commons](#) licence will apply to this Work are set out in our licence referred to above.

Other than as permitted in any relevant BMJ Author's Self Archiving Policies, I confirm this Work has not been accepted for publication elsewhere, is not being considered for publication elsewhere and does not duplicate material already published. I confirm all authors consent to publication of this Work and authorise the granting of this licence.

1  
2  
3 **Why did some parents not send their children back to school following school**  
4 **closures during the COVID-19 pandemic: a cross-sectional survey**  
5

6 Lisa Woodland MSc, King's College London, Weston Education Centre, Cutcombe  
7 Road, London SE5 9RJ, UK  
8

9 Louise E Smith PhD, King's College London, Weston Education Centre, Cutcombe  
10 Road, London SE5 9RJ, UK  
11

12 Rebecca K Webster PhD, University of Sheffield, Cathedral Court, 1 Vicar Lane,  
13 Sheffield, S1 2LT, UK  
14

15 Richard Amlôt PhD, Public Health England, Emergency Response Department,  
16 Porton Down, Salisbury, SP4 0JG, UK  
17

18 Antonia Rubin MA (Cantab), Trustee at Weald of Kent Grammar School, Tudeley  
19 Lane, Tonbridge, Kent, TN9 2JP, UK.  
20

21 Simon Wessely PhD, King's College London, Weston Education Centre, Cutcombe  
22 Road, London SE5 9RJ, UK  
23

24 G James Rubin PhD, King's College London, Weston Education Centre, Cutcombe  
25 Road, London SE5 9RJ, UK  
26  
27  
28  
29

30 Correspondence to: Lisa Woodland, King's College London, Weston Education  
31 Centre, Cutcombe Road, London SE5 9RJ, UK, [lisa.woodland@kcl.ac.uk](mailto:lisa.woodland@kcl.ac.uk)  
32  
33

34  
35 **Word Count: 2,637**  
36  
37  
38  
39  
40  
41  
42  
43  
44  
45  
46  
47  
48  
49  
50  
51  
52  
53  
54  
55  
56  
57  
58  
59  
60

## ABSTRACT

### Background

On 23<sup>rd</sup> March 2020, schools closed to most children in England in response to COVID-19 until September 2020. Schools were kept open to children of key workers and vulnerable children, on a voluntary basis. Starting 1<sup>st</sup> June 2020 children in reception (four to five years old), year one (five to six years old) and year six (10 to 11 years old) also became eligible to attend school.

### Methods

1,373 parents or guardians of children eligible to attend school completed a cross-sectional survey between 8<sup>th</sup> and 11<sup>th</sup> June 2020. We investigated factors associated with whether children attended school or not.

### Results

46% (n=370 / 803) of children in year-groups eligible to attend school and 13% (n=72 / 570) of children of key workers had attended school in the past seven days. The most common reasons for sending children to school were that the child's education would benefit, the child wanted to go to school, and the parent needed to work. A child was significantly more likely to attend if the parent believed the child had already had COVID-19, they had special educational needs, or a person in the household had COVID-19 symptoms.

### Conclusions

Following any future school closure, helping parents to feel comfortable returning their child to school will require policy makers and school leaders to communicate about the adequacy of their policies to: a) ensure that the risk to children in school is minimised; b) ensure that the educational potential within schools is maximised; and c) ensure that the benefits of school for the psychological well-being of children are prioritised.

### Key Words

Child; COVID-19; parents; school closures; England; cross-sectional studies



## ARTICLE ADDS

### What is known about the subject

The COVID-19 pandemic resulted in the mass closure of schools for an extended period of time. A previous systematic review assessed parental attitudes towards smaller scale closures, finding that many parents (71%-97% across six studies) approved of closures, particularly where they were seen as an effective protective measure against a serious illness. The effect on a child's education and ability of the parent to work were reported as concerns.

### What this study adds

During the partial reopening of schools in England in June 2020, most parents did not send their children to school. Parents who were not educated to degree level, not working, who lived in the North of England or who were from Black, Asian and ethnic minority backgrounds were least likely to send their children back. Education, risk of disease and children's well-being were the main drivers in determining parental decision to send them to school or not.

## INTRODUCTION

On 23<sup>rd</sup> March 2020, a nationwide closure of schools occurred across England in response to the COVID-19 pandemic. Only vulnerable children (those with a health care plan or social worker) and children of key workers (critical to the COVID-19 response) were able to attend.[1,2] From 1<sup>st</sup> June 2020 children in reception (four to five years), year one (five to six years) and year six (10 to 11 years) also became eligible to attend.[3] Until September 2020 school attendance was voluntary to those children eligible to attend.[4]

The benefits of closing schools to reduce the transmission of COVID-19 and the negative consequences of doing so were difficult to balance.[5,6] Adding to the debate was emerging evidence of a low transmission rate of COVID-19 among children [7-10] and a recognition that outbreaks may occur nonetheless.[11,12]

Irrespective of this debate, it was clear that many parents felt far from comfortable with their children attending school in the first months of the pandemic, even where it was encouraged.[13] A worldwide systematic review of school closures suggests several factors that may be relevant to whether a child attended school during an infectious disease outbreak.[14] Nineteen papers were included in the review, samples representing between 67 and 4,171 school-aged children (five to 19 years). Perceived risk of infection,[15,16] concern about the impact of a closure on education,[15,17] and parental concerns about their child's mental health were key issues.[18] Understanding the key issues that determine whether a parent is willing to send their children back to school when it is partially open, and ensuring that school policies and communications address these concerns, should help inform re-opening schools, in this or any future pandemic.

In this study, we investigated factors associated with a parent's willingness to send their child to school when they partially re-opened, following closures due to the COVID-19 pandemic. We investigated these factors for children in reception, year one, or year six and for families where at least one parent was a key worker.

## METHODS

### Design

We commissioned a market research company to conduct a cross-sectional survey one week after schools in England re-opened for children in reception, year one, and year six (8<sup>th</sup> to 11<sup>th</sup> June 2020). We have previously reported data from this survey relating to parental perceptions of the presence of hygiene procedures within schools.[19]

### Participants

Participants (n=2,447) were recruited from BMG Research's panel. In order to achieve a sample broadly representative of the population, BMG Research monitored region, child age, child gender, parent/guardian age, and parent/guardian gender. Participants were eligible for the study if they were aged eighteen years or

1  
2  
3 over, lived in England, and were a parent or guardian to a school-aged child (4-18  
4 years) who usually lived with them.[20] 183 participants were screened out for non-  
5 eligibility, 226 participants dropped out after starting the survey and 28 completed  
6 but were removed for quality control such as completing the survey quickly or for  
7 'straight-lining' (selecting the same option for every question) suggesting inattention  
8 to the questions. 2,010 participants remained. The sample fell within five percentage  
9 points of the national population by the child's gender, key stage, and type of school  
10 attended against the known distribution for school children in England.[21] The  
11 sample used in this paper were 803 parents of children in eligible school years and  
12 570 parents from families in which at least one parent was a key worker (9  
13 participants were removed from this group due to logical inconsistencies which  
14 suggested they had accidentally completed the wrong section).

15  
16  
17  
18  
19 Participants were paid equivalent to £0.60.

## 20 21 **Study Materials**

22  
23 The full survey is available in the supplementary materials.

24  
25 Selection of a child to answer questions about

26  
27 All participants were asked to select their child with the most recent birthday to  
28 answer questions about. In cases where children shared a birthday, we asked the  
29 parent to select one child.

30  
31 Our survey had two sections. Section one was only completed by parents who had a  
32 child in reception, year one, or year six or by parents who did not have a child in  
33 these year groups, but they or their spouse were a key worker. It contained  
34 questions about whether the child had attended school in the past week. Section two  
35 was completed by these parents and also by parents who did not have a child  
36 eligible to attend school. It contained general questions on views about risk of  
37 COVID-19, family living and school safety measures. In this paper we only report  
38 data from section one, relating to actual attendance in the past week.

39  
40  
41 Personal Characteristics

42  
43 We asked participants to report their gender, age, region, household income,  
44 employment status, marital status, ethnicity, and level of education. We also asked  
45 whether anyone within the household was aged over 70 years or had a health  
46 condition that made them vulnerable to COVID-19.

47  
48  
49 We asked participants to report the child's gender, age, school year, school type  
50 (fee-paying or state-funded) and whether the child had special educational needs  
51 (SEN).

52  
53 School Attendance

54  
55 Participants were asked how many times the child had attended school in the past  
56 seven days. Depending on the response, parents were presented with randomised  
57 statements: 10 for why they were sending the child to school; 12 for why they were  
58 only sending the child to school part-time; or 16 why their child was not attending  
59  
60

1  
2  
3 school. We asked participants to “tick any [statement] that applies”. Participants also  
4 had the option to write-in text for “other reason”.

## 6 COVID-19 Symptoms

8  
9 We asked participants to report if the selected child had experienced any symptoms  
10 “in the past seven days” from a list of ten symptoms. We also asked if they or a  
11 household member (other than the child) had experienced symptoms “in the past 14  
12 days” from the same symptom list. We asked participants whether they thought their  
13 child had had COVID-19.

## 15 Well-Being

17  
18 We asked participants to report the child’s well-being using two subscales from the  
19 Revised Child Anxiety Disorder Scale (RCADS):[22] the generalised anxiety disorder  
20 (GAD) sub-scale and the major depressive disorder (MDD) sub-scale.

## 22 ETHICS

23  
24  
25 The research was approved by the Psychiatry, Nursing and Midwifery Research  
26 Ethics Subcommittee at King’s College London (LRS—19/20-18787).

## 28 PATIENT AND PUBLIC INVOLVEMENT.

29  
30  
31 A school trustee contributed to the development of the survey materials and co-  
32 authored this paper.

## 34 ANALYSIS

### 36 Recoding of variables

37  
38  
39 School attendance was defined as a child who attended school for at least one day,  
40 in the past seven days.

41  
42  
43 We created two binary variables to indicate whether the child, and someone in the  
44 household (other than the child) had a health condition that might make them  
45 particularly vulnerable to COVID-19.

46  
47  
48 We created two binary variables to indicate recent presence of COVID-19 symptoms  
49 in the child, and someone else in the household. We defined presence of COVID-19  
50 symptoms as experiencing a “new, continuous cough”, “high temperature / fever”,  
51 “loss of sense of smell (fully or partial)”, or “loss of taste”. We coded a binary variable  
52 for the parent’s perception of whether the child had had COVID-19 by grouping  
53 together “they have definitely had it or definitely have it now” and “they have  
54 probably had it or probably have it now”.

55  
56  
57 We created a binary variable to indicate low well-being in the child. We assigned a  
58 value against each answer from 0 (“never”) to 3 (“always”) on the GAD and MDD  
59 RCADS sub-scales and created a total score for each sub-scale. We then turned  
60 each total score into a t-score, a method used to normalise RCADS scores within the

1  
2  
3 population, by child's age and gender.[22,23] We used the same process for  
4 reception to year three as for year four. We used a t-score cut off of 65 or above on  
5 either GAD or MDD sub-scales to indicate low well-being.  
6

7 For all variables, we coded the responses "don't know", "not applicable", "prefer not  
8 to say" and "prefer to self-describe" as missing data.  
9

## 10 Analysis

11 We ran a series of binary logistic regressions using SPSS v26.0,[24] investigating  
12 univariable associations between each of our predictor variables and sending the  
13 child to school. We ran a second set of binary logistic regressions controlling for  
14 personal characteristics shown in the results.  
15  
16  
17

18 We analysed frequencies for the statements responding to sending the child to  
19 school for a full week (five days), part-time (less than five days), and for not sending  
20 the child to school.  
21

22 For ease of interpretation, we used unweighted data in our analysis.  
23

24 We applied a Bonferroni correction to our results ( $p \leq .001$ ) due to running many  
25 analyses (children in school years  $n=29$  and children of key workers  $n=31$ ). Results  
26 meeting this criterion are marked by a double asterisk (\*\*) in the tables.  
27  
28

## 29 Sample size calculation

30 Post-hoc calculations were run on the two sub-samples which had a margin of error  
31 of plus or minus 5% at the 95% confidence level for each prevalence estimate.  
32  
33

## 34 RESULTS

### 35 School attendance

36 Nearly half (46% CI, 43% to 50%,  $n=370/803$ ) of children in eligible school years had  
37 attended school and about half had not (54% 95% CI, 50% to 57%,  $n=432/803$ ). One  
38 participant was unsure if the child had attended school. The most common reasons  
39 for not sending a child to school were: thinking it was too risky for the child to attend  
40 school ( $n=223$ , 52%), the school not being open ( $n=140$ , 32%) and having another  
41 child who could not go to school ( $n=67$ , 16%). The most common reasons for sending  
42 a child to school were: the child's education would benefit ( $n=208$ , 56%), the child  
43 wants to go to school ( $n=200$ , 54%), and the child will benefit from seeing their  
44 friends ( $n=187$ , 51%). Of participants whose child did not attend school for a full  
45 week ( $n=204$ , 25%) the most common reasons for partial attendance were: the  
46 school only offers them to be in part-time ( $n=80$ , 39%), it is less risky for them to be  
47 in part-time ( $n=40$ , 20%), and I am only sending them in on days where the lessons  
48 are important ( $n=28$ , 14%).  
49  
50  
51  
52  
53  
54  
55

56 Only 13% (95% CI, 10% to 15%,  $n=72/570$ ) of children of key workers had attended  
57 school, most children had not (87% 95% CI, 85% to 90%,  $n = 497/570$ ). One  
58 participant was unsure if the child had attended school. The most common reasons  
59  
60

1  
2  
3 for children not attending school were: the school was not open (n=259, 52%), the  
4 school had asked the child not to attend (n=117, 24%), and thinking that it was too  
5 risky for the child to attend school at the moment (n=109, 22%). The most common  
6 reasons for attending school were: the parent needing to work (n=40, 56%), the child  
7 wanting to go to school (n=35, 49%), and thinking that the child's education would  
8 benefit from being at school (n=30, 42%). Of participants with children who attended  
9 school part-time the most common reasons were: the school only offered them to be  
10 in part-time (n=16, 41%), parent only sent them in on days where the lessons are  
11 important (n=8, 21%), and believing it was less risky for them to be in part-time (n=7,  
12 18%).  
13  
14  
15

## 16 **Associations**

17  
18 Participant characteristics for children in eligible school years and for children of key  
19 workers are shown in table 1. Parents of children in eligible school years were less  
20 likely to send the child to school if they were educated to A-level or below, not  
21 working, of Black, Asian and minority ethnicity (BAME), or living in the North East,  
22 North West, and Yorkshire and the Humber compared to London. Whereas children  
23 of key workers were more likely to attend school for participants aged 45 and under  
24 and who were working. Child attendance was more likely for children in eligible  
25 school years when in a fee-paying school and if they had a health condition that  
26 made them vulnerable to COVID-19. For both groups, attendance was more likely for  
27 children who had special educational needs, reported low well-being, thought their  
28 child had had COVID-19 and when a person over 70 was living in the household.  
29 There was also a significant association in both groups between a child being more  
30 likely to attend school and the child having experienced COVID-19 symptoms in the  
31 past 7 days, or another person in the household having experienced COVID-19  
32 symptoms in the past 14 days.  
33  
34  
35  
36  
37  
38  
39  
40  
41  
42  
43  
44  
45  
46  
47  
48  
49  
50  
51  
52  
53  
54  
55  
56  
57  
58  
59  
60

Table 1. Participant characteristics for children in eligible school years (n=803) and children of key works (n=570), by school attendance.

|                                |                        | Children in Eligible school years |                        |                              |                                | Children of key workers      |                        |                               |                                |
|--------------------------------|------------------------|-----------------------------------|------------------------|------------------------------|--------------------------------|------------------------------|------------------------|-------------------------------|--------------------------------|
|                                | Level                  | Did not attend school, n (%)      | Attended School, n (%) | Odds ratio (95% CI)          | Adjusted odds ratio (95% CI) † | Did not attend school, n (%) | Attended School, n (%) | Odds ratio (95% CI)           | Adjusted odds ratio (95% CI) † |
| Gender                         | Male                   | 201 (52)                          | 187 (48)               | 1.22 (0.92 to 1.61)          | 1.04 (0.75 to 1.43)            | 227 (85)                     | 39 (15)                | 1.53 (0.92 to 2.55)           | 1.61 (0.91 to 2.85)            |
|                                | Female                 | 230 (57)                          | 177 (43)               | Reference                    | Reference                      | 268 (90)                     | 30 (10)                | Reference                     | Reference                      |
| Age                            | 18-35 years            | 129 (49)                          | 136 (51)               | 1.37 (0.92 to 2.03)          | 1.23 (0.79 to 1.92)            | 54 (77)                      | 16 (23)                | <b>3.16* (1.56 to 6.37)</b>   | <b>2.95* (1.23 to 7.08)</b>    |
|                                | 36-45 years            | 212 (56)                          | 164 (44)               | 1.01 (0.70 to 1.46)          | 0.98 (0.65 to 1.48)            | 198 (86)                     | 33 (14)                | <b>1.76* (1.01 to 3.12)</b>   | <b>2.14* (1.12 to 4.09)</b>    |
|                                | 46 years ≥             | 91 (56.5)                         | 70 (43.5)              | Reference                    | Reference                      | 245 (91)                     | 23 (9)                 | Reference                     | Reference                      |
| Region                         | East Midlands          | 33 (60)                           | 22 (40)                | <b>0.50* (0.27 to 0.93)</b>  | 0.59 (0.31 to 1.14)            | 45 (85)                      | 8 (15)                 | 0.85 (0.32 to 2.22)           | 1.23 (0.40 to 3.75)            |
|                                | East of England        | 38 (48)                           | 41 (52)                | 0.81 (0.48 to 1.38)          | 0.92 (0.52 to 1.64)            | 54 (82)                      | 12 (18)                | 1.06 (0.45 to 2.52)           | 1.38 (0.50 to 3.81)            |
|                                | North East             | 33 (67)                           | 16 (33)                | <b>0.36* (0.19 to 0.71)</b>  | <b>0.38* (0.21 to 0.78)</b>    | 32 (89)                      | 4 (11)                 | 0.60 (0.18 to 1.98)           | 0.93 (0.25 to 3.46)            |
|                                | North West             | 68 (65)                           | 36 (35)                | <b>0.40** (0.24 to 0.66)</b> | <b>0.39* (0.23 to 0.68)</b>    | 80 (93)                      | 6 (7)                  | <b>0.36* (0.13 to 0.99)</b>   | 0.61 (0.19 to 1.89)            |
|                                | South East             | 70 (51)                           | 66 (49)                | 0.71 (0.45 to 1.11)          | 0.92 (0.56 to 1.52)            | 82 (89)                      | 10 (11)                | 0.58 (0.24 to 1.94)           | 0.81 (0.29 to 2.29)            |
|                                | South West             | 24 (46)                           | 28 (54)                | 0.88 (0.47 to 1.63)          | 1.16 (0.58 to 2.31)            | 42 (87.5)                    | 6 (12.5)               | 0.68 (0.42 to 1.94)           | 1.18 (0.37 to 3.82)            |
|                                | West Midlands          | 39 (56)                           | 30 (44)                | 0.58 (0.33 to 1.01)          | 0.63 (0.34 to 1.18)            | 48 (89)                      | 6 (11)                 | 0.60 (0.21 to 1.68)           | 0.84 (0.27 to 2.60)            |
|                                | Yorkshire & the Humber | 52 (62)                           | 31 (37)                | <b>0.45* (0.26 to 0.76)</b>  | <b>0.52* (0.29 to 0.93)</b>    | 52 (88)                      | 7 (12)                 | 0.64 (0.24 to 1.73)           | 0.80 (0.27 to 2.41)            |
|                                | London                 | 75 (43)                           | 100 (57)               | Reference                    | Reference                      | 62 (83)                      | 13 (17)                | Reference                     | Reference                      |
| Household income               | ≤ £34,999              | 164 (54)                          | 142 (46)               | 1.00 (0.75 to 1.33)          | 1.34 (0.95 to 1.90)            | 185 (89)                     | 23 (11)                | 0.75 (0.44 to 1.28)           | 0.96 (0.51 to 1.81)            |
|                                | £35,000 ≥              | 254 (54)                          | 220 (46)               | Reference                    | Reference                      | 285 (86)                     | 47 (14)                | Reference                     | Reference                      |
| Employment status <sup>1</sup> | Working                | 362 (52)                          | 337 (48)               | <b>1.95* (1.25 to 3.05)</b>  | <b>1.94* (1.16 to 3.24)</b>    | 435 (86)                     | 70 (14)                | <b>9.33* (1.27 to 68.47)</b>  | <b>8.64* (1.13 to 65.96)</b>   |
|                                | Not working            | 67 (68)                           | 32 (32)                | Reference                    | Reference                      | 58 (98)                      | 1 (2)                  | Reference                     | Reference                      |
| Education level                | ≤ A-level              | 179 (63)                          | 105 (37)               | <b>0.56** (0.41 to 0.75)</b> | <b>0.59* (0.42 to 0.84)</b>    | 227 (88)                     | 31 (12)                | 0.91 (0.55 to 1.51)           | 1.27 (0.71 to 2.26)            |
|                                | Degree ≥               | 248 (49)                          | 261 (51)               | Reference                    | Reference                      | 267 (87)                     | 40 (13)                | Reference                     | Reference                      |
| Marital status                 | Living alone           | 49 (48)                           | 54 (52)                | 1.34 (0.88 to 2.02)          | 1.30 (0.82 to 2.06)            | 75 (88)                      | 10 (12)                | 0.91 (0.45 to 1.85)           | 0.92 (0.41 to 2.03)            |
|                                | Married/cohabiting     | 383 (55)                          | 316 (45)               | Reference                    | Reference                      | 422 (87)                     | 62 (13)                | Reference                     | Reference                      |
| Ethnicity                      | White                  | 355 (53)                          | 316 (47)               | 1.23 (0.84 to 1.12)          | <b>1.66* (1.07 to 2.58)</b>    | 450 (87)                     | 65 (13)                | 1.04 (0.42 to 2.53)           | 1.47 (0.53 to 4.13)            |
|                                | BAME                   | 72 (58)                           | 52 (42)                | Reference                    | Reference                      | 43 (78)                      | 12 (22)                | Reference                     | Reference                      |
| Child gender                   | Boy                    | 230 (51.5)                        | 217 (48.5)             | 1.25 (0.94 to 1.65)          | 1.15 (0.85 to 1.56)            | 244 (87)                     | 36 (13)                | 1.04 (0.63 to 1.70)           | 0.96 (0.56 to 1.66)            |
|                                | Girl                   | 202 (57)                          | 153 (43)               | Reference                    | Reference                      | 253 (87.5)                   | 36 (12.5)              | Reference                     | Reference                      |
| School year                    | Early Years            | 77 (59)                           | 53 (41)                | 0.74 (0.50 to 1.10)          | 0.79 (0.51 to 1.23)            | ***                          | ***                    | ***                           | ***                            |
|                                | Key Stage 1            | 157 (54)                          | 132 (46)               | 0.90 (0.66 to 1.22)          | 0.88 (0.63 to 1.24)            | 30 (86)                      | 5 (14)                 | 2.10 (0.57 to 7.81)           | 1.52 (0.37 to 6.30)            |
|                                | Key Stage 2            | 198 (52)                          | 185 (48)               | Reference                    | Reference                      | 120 (86)                     | 20 (15)                | 2.10 (0.75 to 5.86)           | 1.45 (0.47 to 4.44)            |
|                                | Key Stage 3            | ***                               | ***                    | ***                          | ***                            | 152 (87)                     | 23 (13)                | 1.91 (0.69 to 5.24)           | 1.58 (0.55 to 4.55)            |
|                                | Key Stage 4            | ***                               | ***                    | ***                          | ***                            | 132 (87)                     | 19 (13)                | 1.81 (0.65 to 5.08)           | 1.44 (0.49 to 4.24)            |
|                                | Years 12 & 13          | ***                               | ***                    | ***                          | ***                            | 63 (93)                      | 5 (7)                  | Reference                     | Reference                      |
| School type                    | Fee-paying             | 35 (33)                           | 71 (67)                | <b>2.68** (1.74 to 4.13)</b> | <b>2.50** (1.56 to 4.00)</b>   | 30 (77)                      | 9 (23)                 | <b>2.20* (1.00 to 4.85)</b>   | 2.04 (0.82 to 5.07)            |
|                                | State-funded           | 395 (57)                          | 299 (43)               | Reference                    | Reference                      | 462 (88)                     | 63 (12)                | Reference                     | Reference                      |
| Child has SEN                  | Yes                    | 22 (31)                           | 48 (69)                | <b>2.78** (1.64 to 4.70)</b> | <b>2.30* (1.27 to 4.17)</b>    | 28 (61)                      | 18 (39)                | <b>5.74** (2.97 to 11.08)</b> | <b>7.92** (3.59 to 17.46)</b>  |
|                                | No                     | 406 (56)                          | 319 (44)               | Reference                    | Reference                      | 464 (90)                     | 52 (10)                | Reference                     | Reference                      |
| Low child well-being           | Yes                    | 92 (42)                           | 124 (57)               | <b>1.86** (1.36 to 2.55)</b> | <b>1.47* (1.04 to 2.07)</b>    | 127 (82)                     | 28 (18)                | <b>1.85* (1.11 to 3.10)</b>   | <b>1.78* (1.00 to 3.21)</b>    |

1

2

3

4

5

6

7

8

9

10

11

12

13

14

15

16

17

18

19

20

21

22

23

24

25

26

27

28

29

30

31

32

33

34

35

36

37

38

39

40

41

42

43

44

45

46

|                        |     |            |            |                               |                               |            |           |                               |                               |
|------------------------|-----|------------|------------|-------------------------------|-------------------------------|------------|-----------|-------------------------------|-------------------------------|
|                        | No  | 340 (58)   | 246 (42)   | Reference                     | Reference                     | 370 (89)   | 44 (11)   | Reference                     | Reference                     |
| Child vulnerable       | Yes | 28 (39)    | 44 (61)    | <b>2.00* (1.21 to 3.28)</b>   | <b>1.76* (1.00 to 3.10)</b>   | 33 (82.5)  | 7 (17.5)  | 1.49 (0.63 to 3.50)           | 0.93 (0.33 to 2.63)           |
| COVID-19               | No  | 401 (56)   | 316 (44)   | Reference                     | Reference                     | 455 (87.5) | 65 (12.5) | Reference                     | Reference                     |
| Household vulnerable   | Yes | 115 (60)   | 78 (40)    | 0.78 (0.56 to 1.08)           | 0.74 (0.51 to 1.06)           | 134 (88)   | 18 (12)   | 0.90 (0.50 to 1.60)           | 0.56 (0.44 to 1.67)           |
| COVID-19               | No  | 295 (53)   | 258 (47)   | Reference                     | Reference                     | 314 (87)   | 47 (13)   | Reference                     | Reference                     |
| Child COVID-19         | Yes | 15 (24)    | 47 (76)    | <b>5.05** (2.22 to 7.36)</b>  | <b>3.02* (1.49 to 6.15)</b>   | 11 (58)    | 8 (42)    | <b>5.52** (2.14 to 14.24)</b> | <b>5.25* (1.58 to 17.41)</b>  |
| symptoms               | No  | 417 (56)   | 323 (44)   | Reference                     | Reference                     | 486 (88)   | 64 (12)   | Reference                     | Reference                     |
| Household COVID-19     | Yes | 9 (17)     | 43 (83)    | <b>6.18** (2.97 to 12.86)</b> | <b>6.04** (2.62 to 13.91)</b> | 13 (65)    | 7 (35)    | <b>4.00* (1.54 to 10.42)</b>  | <b>4.11* (1.26 to 13.44)</b>  |
| symptoms               | No  | 423 (56)   | 327 (43)   | Reference                     | Reference                     | 484 (88)   | 65 (12)   | Reference                     | Reference                     |
| Child has had or       | Yes | 36 (24)    | 112 (76)   | <b>4.78** (3.18 to 7.17)</b>  | <b>4.03** (2.57 to 6.30)</b>  | 40 (67)    | 20 (33)   | <b>4.40** (2.40 to 8.08)</b>  | <b>5.20** (2.48 to 10.93)</b> |
| currently has COVID-19 | No  | 396 (61)   | 258 (37)   | Reference                     | Reference                     | 457 (90)   | 52 (10)   | Reference                     | Reference                     |
| Someone over 70        | Yes | 11 (26)    | 32 (74)    | <b>3.62** (1.80 to 7.30)</b>  | <b>3.19* (1.45 to 7.05)</b>   | 8 (57)     | 6 (43)    | <b>5.56* (1.87 to 16.52)</b>  | <b>3.49* (0.98 to 12.46)</b>  |
| years                  | No  | 421 (55.5) | 338 (44.5) | Reference                     | Reference                     | 489 (88)   | 66 (12)   | Reference                     | Reference                     |

\*  $p \leq .05$  and formatted bold

\*\*  $p \leq .001$  and formatted bold

\*\*\* data not applicable for the sample

† Adjusting for participant gender, age, region, household income, employment status, education level, marital status, participant ethnicity, and the child's gender, school year and school-type.

<sup>1</sup> Working includes students and volunteers

Decimal places have been used for rounding errors



## DISCUSSION

Most children eligible to attend school did not attend one week after schools in England began to re-open to more children.[25] Worryingly, we observed patterns that seemed likely to entrench existing educational inequalities. Children from households where parents have lower education achievements, BAME households and households in the North of England, and state-funded being least likely to attend school.

Our results suggest that several broad areas determined attendance at school. First, risk perceptions were crucial. The response “it is too risky” featured highly in parental reasons for not sending children to school. Secondly, children were also more likely to attend school when parents thought their child had had COVID-19 which could indicate the belief their child is immune to further infection.[26] Unexpectedly, children were more likely to attend school when they had a health condition that made them vulnerable to COVID-19 and when a person over 70 years was living in the household. We speculate that this may be because these circumstances affect the parent’s ability to look after the child at home.

Poorer perceived child well-being was associated with them being more likely to attend school. This finding may reflect parental desire to improve their child’s well-being which may have been impacted by the school closure.[27] This was also apparent in reasons parents gave for sending their child to school. As expected,[14] concerns about education also featured highly as a reason for attendance, while perceptions that schools could not provide good quality education or that some lessons were not as important were cited as reasons for absence or partial attendance.

Despite most children of key workers not attending school, needing to work was the most reported reason for school attendance and the school not opening or asking the child not to attend were the most commonly reported reasons for the child not being in school. This suggests that work commitments were the main driver for this group.

One notable finding was that children who had symptoms of COVID-19 in the past seven days, or whose household members had these symptoms in the past 14 days were significantly more likely to have gone to school. We do not know if the child attended school whilst having symptoms or when symptoms were present in the household (against self-isolation guidance)[28]. However, given that school closure is specifically designed to reduce the transmission of respiratory infections in general, it is also possible that this reflects the re-emergence of transmission of upper respiratory tract infections, or COVID-19 specifically, within the school environment.[29] It may also reflect increased anxiety or awareness among parents around COVID-19 symptoms, resulting in higher symptom detection and reporting.

## LIMITATIONS

Several limitations should be borne in mind for this study. First the cross-sectional nature of this study limits our ability to draw causal findings. Second, the RCADS subscale was used to indicate low well-being but is currently not validated for children under eight years.[30] Third, online polls can be unrepresentative, and lead to response, and self-reporting bias.[31] However, in line with the reasoning relating to the use of non-probability samples in social sciences, [32] we assume that the associations within our data do generalise to the wider population. Fourth, we ran many analyses raising the possibility of Type 1 errors. While we have provided Bonferroni corrections in the tables for readers who wish to correct this, this correction in turn may be overly conservative.

## CONCLUSION

Our findings support previous research by suggesting that during an infectious disease outbreak, parents' decision to send their child to school was impacted by the risk of disease (COVID-19), child's education and well-being. Furthermore, without reassuring parents in these three areas and encouraging them to send their children to school health inequalities are likely to be increased.

### Contributors

All authors contributed to the conceptualisation of the study and approved the final draft. LW designed the survey, analysed the data and drafted the manuscript. LES designed the survey, analysed the data and edited the manuscript. RKW edited the manuscript. RA designed the survey and edited the manuscript. AR designed the survey and edited the manuscript. SW edited the manuscript. GJR designed the survey, analysed the data and edited the manuscript.

### Declarations of interests

We declare no competing interests.

### Acknowledgments

This study was funded by the Economic and Social Research Council and the National Institute for Health Research Health Protection Research Unit (NIHR HPRU) [grant number NIHR200890] in Emergency Preparedness and Response, a partnership between Public Health England, King's College London and the University of East Anglia. The views expressed are those of the authors and not necessarily those of the NIHR, Public Health England or the Department of Health and Social Care.

### Role of the funding source

1  
2  
3 The funders had no role in study design, data collection, data analysis, data  
4 interpretation, or writing of the manuscript. The corresponding author had full access  
5 to all the data and had final responsibility for the decision to submit for publication.  
6  
7  
8  
9  
10  
11  
12  
13  
14  
15  
16  
17  
18  
19  
20  
21  
22  
23  
24  
25  
26  
27  
28  
29  
30  
31  
32  
33  
34  
35  
36  
37  
38  
39  
40  
41  
42  
43  
44  
45  
46  
47  
48  
49  
50  
51  
52  
53  
54  
55  
56  
57  
58  
59  
60

Confidential: For Review Only

## REFERENCES

- 1 Prime Minister B Johnson. PM statement on coronavirus: 18 March 2020. Available at: [https://www.gov.uk/government/speeches/pm-statement-on-coronavirus-18-march-2020?utm\\_source=407969fc-4de1-41c8-9571-f6b6ad35efae&utm\\_medium=email&utm\\_campaign=govuk-notifications&utm\\_content=immediate](https://www.gov.uk/government/speeches/pm-statement-on-coronavirus-18-march-2020?utm_source=407969fc-4de1-41c8-9571-f6b6ad35efae&utm_medium=email&utm_campaign=govuk-notifications&utm_content=immediate) Accessed 11 June 2020.
- 2 Government. H. Children of critical workers and vulnerable children who can access schools or educational settings. Available at: <https://www.gov.uk/government/publications/coronavirus-covid-19-maintaining-educational-provision/guidance-for-schools-colleges-and-local-authorities-on-maintaining-educational-provision> Accessed 16 March 2021.
- 3 Prime Minister B Johnson. PM confirms schools, colleges and nurseries on track to begin phased reopening. Available at: <https://www.gov.uk/government/news/pm-confirms-schools-colleges-and-nurseries-on-track-to-begin-phased-reopening> Accessed 11 June 2020.
- 4 HM Government. School Attendance. Available at: <https://www.gov.uk/government/publications/school-attendance> Accessed 8 July 2020.
- 5 Viner RM, Russell SJ, Croker H, et al. School closure and management practices during coronavirus outbreaks including COVID-19: a rapid systematic review. *The Lancet Child & Adolescent Health*. 2020;4(5):397-404 DOI: 10.1016/s2352-4642(20)30095-x
- 6 Keogh-Brown MR, Jensen HT, Edmunds WJ, Smith RD. The impact of Covid-19, associated behaviours and policies on the UK economy: A computable general equilibrium model. *SSM - Population Health*. 2020;[in press]:100651 DOI: 10.1016/j.ssmph.2020.100651
- 7 Boast A, Munro A, Goldstein H. An evidence summary of Paediatric COVID-19 literature. Available at: <https://dontforgetthebubbles.com/evidence-summary-paediatric-covid-19-literature/> Accessed 8 July 2020.
- 8 Zhu Y, Bloxham C, K H, et al. Children are unlikely to have been the primary source of household SARS-CoV-2 infections. 2020; DOI: 10.1101/2020.03.26.20044826v1
- 9 World Health Organization. Report of the WHO-China joint mission on coronavirus disease 2019 (COVID-19). Available at: [https://www.who.int/publications/i/item/report-of-the-who-china-joint-mission-on-coronavirus-disease-2019-\(covid-19\)](https://www.who.int/publications/i/item/report-of-the-who-china-joint-mission-on-coronavirus-disease-2019-(covid-19)) Accessed 8 July 2020.
- 10 Heavey L, Casey G, Kelly C, et al. No evidence of secondary transmission of COVID-19 from children attending school in Ireland, 2020. *Eurosurveillance*. 2020;25(21) DOI: 10.2807/1560-7917.es.2020.25.21.2000903
- 11 Otte Im Kampe E, Lehfeld A-S, Buda S, et al. Surveillance of COVID-19 school outbreaks, Germany, March to August 2020. *Eurosurveillance*. 2020;25(38) DOI: 10.2807/1560-7917.es.2020.25.38.2001645
- 12 England. PH. SARS-CoV-2 infection and transmission in educational settings. Available at: <https://www.gov.uk/government/publications/sars-cov-2-infection-and-transmission-in-educational-settings> Accessed 22 October 2020.
- 13 Royal College of Paediatrics and Child Health. COVID\_19 - talking to children and families about returning to school: guiding principles. Available at: <https://www.rcpch.ac.uk/resources/covid-19-talking-children-families-about-returning-school-guiding-principles> Accessed 9 July 2020.

- 14 Brooks SK, Smith LE, Webster RK, et al. The impact of unplanned school closure on children's social contact: rapid evidence review. *Euro Surveill.* 2020;25(13) DOI: 10.2807/1560-7917.ES.2020.25.13.2000188
- 15 Basurto-Dávila R, Garza R, Meltzer MI, et al. Household economic impact and attitudes toward school closures in two cities in Argentina during the 2009 influenza A (H1N1) pandemic. *Influenza and Other Respiratory Viruses.* 2013;7(6):1308-15 DOI: 10.1111/irv.12054
- 16 Effler PV, Carcione D, Giele C, et al. Household responses to pandemic (H1N1) 2009-related school closures, Perth, Western Australia. *Emerg Infect Dis.* 2010;16(2):205-11 DOI: 10.3201/eid1602.091372
- 17 van Gemert C, McBryde ES, Bergeri I, et al. Description of social contacts among student cases of pandemic influenza during the containment phase, Melbourne, Australia, 2009. *Western Pac Surveill Response J.* 2018;9(5 Suppl 1):27-34 DOI: 10.5365/wpsar.2018.9.5.003
- 18 Lee J. Mental health effects of school closures during COVID-19. *The Lancet Child & Adolescent Health.* 2020;4(6):421 DOI: 10.1016/s2352-4642(20)30109-7
- 19 Smith LE, Woodland L, Amlôt R, et al. A cross-sectional survey of parental perceptions of COVID-19 related hygiene measures within schools and adherence to social distancing in journeys to and from school. *BMJ Paediatrics Open.* 2020;4(1) DOI: 10.1136/bmjpo-2020-000825
- 20 Research. B. BMG About Us. Available at: <https://www.bmgresearch.co.uk/bmg/about-us/> Accessed 16 March 2021.
- 21 HM Government. Schools, pupils and their characteristics: Academic Year 2019/20. Available at: <https://explore-education-statistics.service.gov.uk/find-statistics/school-pupils-and-their-characteristics> Accessed 25 June 2020.
- 22 Chorpita BF, Yim L, Moffitt C, et al. Assessment of symptoms of DSM-IV anxiety and depression in children: a revised child anxiety and depression scale. *Behaviour Research and Therapy.* 2000;38(8):835-55 DOI: 10.1016/s0005-7967(99)00130-8
- 23 Chorpita BF. Child FIRST - Focus on innovation and redesign in systems and treatment. Available at: <https://www.childfirst.ucla.edu/resources/> Accessed 6 July 2020.
- 24 IBM Corp.2019. IBM SPSS Statistics for Windows, 26.0 Armonk, NY.
- 25 HM Government. attendance in education and early years settings during the coronavirus (COVID-19) outbreak. Available at: [https://www.gov.uk/government/publications/coronavirus-covid-19-attendance-in-education-and-early-years-settings?utm\\_source=efcd291f-83ee-4d73-860a-7e823b3c0017&utm\\_medium=email&utm\\_campaign=govuk-notifications&utm\\_content=immediate](https://www.gov.uk/government/publications/coronavirus-covid-19-attendance-in-education-and-early-years-settings?utm_source=efcd291f-83ee-4d73-860a-7e823b3c0017&utm_medium=email&utm_campaign=govuk-notifications&utm_content=immediate) Accessed 9 June 2020.
- 26 Smith LE, Mottershaw AL, Egan M, et al. The impact of believing you have had COVID-19 on self-reported behaviour: Cross-sectional survey. *PLOS ONE.* 2020;15(11):e0240399 DOI: 10.1371/journal.pone.0240399
- 27 Idoiaga M, Berasategi S, Dosil S, Eiguren M. Struggling to breathe: a qualitative study of children's wellbeing during lockdown in Spain. *Psychology & Health.* 2020:1-16 DOI: 10.1080/08870446.2020.1804570
- 28 HM Government. Protective measures for out-of-school settings during the coronavirus (COVID-19) outbreak. Available at: <https://www.gov.uk/government/publications/protective-measures-for-holiday-or-after-school-clubs-and-other-out-of-school-settings-for-children-during-the-coronavirus-covid-19-outbreak/protective-measures-for-out-of-school-settings-during-the-coronavirus-covid-19-outbreak> Accessed 8 July 2020.

1  
2  
3 29 Panovska-Griffiths J, Kerr CC, Stuart RM, et al. Determining the optimal strategy  
4 for reopening schools, the impact of test and trace interventions, and the risk of  
5 occurrence of a second COVID-19 epidemic wave in the UK: a modelling study. *The*  
6 *Lancet Child & Adolescent Health*. 2020; DOI: 10.1016/s2352-4642(20)30250-9  
7  
8 30 Ebesutani C, Chorpita BF, Higa-McMillan CK, et al. A Psychometric Analysis of  
9 the Revised Child Anxiety and Depression Scales—Parent Version in a School  
10 Sample. *Journal of Abnormal Child Psychology*. 2011;39(2):173-85 DOI:  
11 10.1007/s10802-010-9460-8  
12  
13 31 Epstein WM. Response bias in opinion polls and American social welfare. *The*  
14 *Social Science Journal*. 2006;43(1):99-110 DOI: 10.1016/j.soscij.2005.12.010  
15  
16 32 Kohler U. Possible Uses of Nonprobability Sampling for the Social Sciences.  
17 *Survey Methods: Insights from the Field*. Available at:  
18 <https://surveyinsights.org/?p=10981> Accessed 29 July 2020.  
19  
20  
21  
22  
23  
24  
25  
26  
27  
28  
29  
30  
31  
32  
33  
34  
35  
36  
37  
38  
39  
40  
41  
42  
43  
44  
45  
46  
47  
48  
49  
50  
51  
52  
53  
54  
55  
56  
57  
58  
59  
60

## SUPPLEMENTARY MATERIAL

Table 1: Table of frequencies to show reasons children did not attend school.

| Reason                                                                                                           | Children in School Years (n=432, %) | Children of Key Workers (n=497, %) |
|------------------------------------------------------------------------------------------------------------------|-------------------------------------|------------------------------------|
| I think it is too risky for my child to attend school at the moment                                              | 223 (52%)                           | 109 (22%)                          |
| The school is not open                                                                                           | 140 (32%)                           | 259 (52%)                          |
| I have another child who can't go to school                                                                      | 67 (15.5%)                          | 24 (5%)                            |
| Being at school will be stressful for my child                                                                   | 59 (14%)                            | 23 (5%)                            |
| I think they will get a better education at home than at school at the moment                                    | 57 (13%)                            | 25 (5%)                            |
| The school has asked my child not to attend                                                                      | 51 (12%)                            | 117 (23.5%)                        |
| Someone in my household is clinically vulnerable to coronavirus                                                  | 45 (10%)                            | 24 (5%)                            |
| My child doesn't want to go                                                                                      | 44 (10%)                            | 29 (6%)                            |
| There's no point, schools will shut again soon anyway                                                            | 37 (9%)                             | 13 (3%)                            |
| My child's friends will not be at school                                                                         | 28 (6.5%)                           | 19 (4%)                            |
| Other reason                                                                                                     | 28 (6.5%)                           | 65 (13%)                           |
| I think friends, family or other parents will judge me if I send my child to school                              | 12 (3%)                             | 4 (1%)                             |
| I can't arrange transport to get them to school                                                                  | 6 (1%)                              | 10 (2%)                            |
| Someone else at the school developed coronavirus symptoms (cough or fever, or change in sense of taste or smell) | 6 (1%)                              | 4 (1%)                             |
| My child developed symptoms of a different illness                                                               | 3 (1%)                              | 1 (0%)                             |
| They have developed coronavirus symptoms (cough or fever, or change in sense of taste or smell)                  | 2 (0.5%)                            | 2 (0%)                             |
| Someone else in the family developed coronavirus symptoms (cough or fever, or change in sense of taste or smell) | 0 (0%)                              | 3 (1%)                             |

Table 2: Table of frequencies to show reasons children attended school.

| Reason                                                                                    | Children in School Years (n=370, %) | Children of Key Workers (n=72, %) |
|-------------------------------------------------------------------------------------------|-------------------------------------|-----------------------------------|
| My child's education will benefit from being at school                                    | 208 (56%)                           | 30 (42%)                          |
| My child wants to go to school                                                            | 200 (54%)                           | 35 (49%)                          |
| My child will benefit from seeing their friends                                           | 187 (50.5%)                         | 27 (37.5%)                        |
| I need to work                                                                            | 120 (32%)                           | 40 (56%)                          |
| I don't believe my child will be at risk at school                                        | 96 (26%)                            | 17 (24%)                          |
| Having my child at home is a strain                                                       | 57 (15%)                            | 10 (14%)                          |
| It is compulsory for my child to attend                                                   | 50 (13.5%)                          | 9 (12.5%)                         |
| It reduces costs at home                                                                  | 48 (13%)                            | 7 (10%)                           |
| I think friends, family or other parents will judge me if I don't send my child to school | 43 (12%)                            | 11 (15%)                          |
| I have non-work commitments I need to meet                                                | 21 (6%)                             | 4 (6%)                            |
| Other reason                                                                              | 9 (2%)                              | 3 (4%)                            |

Table 3: Table of frequencies to show reasons children attended school part-time (less than five days).

| Reason                                             | Children in School Years (n=204, %) | Children of Key Workers (n=39, %) |
|----------------------------------------------------|-------------------------------------|-----------------------------------|
| The school only offers for them to be in part-time | 80 (39%)                            | 16 (41%)                          |
| It is less risky for them to be in part-time       | 40 (20%)                            | 7 (18%)                           |

|    |                                                                                                                  |          |           |
|----|------------------------------------------------------------------------------------------------------------------|----------|-----------|
| 1  |                                                                                                                  |          |           |
| 2  |                                                                                                                  |          |           |
| 3  | I am only sending them in on days where the lessons are important                                                | 28 (14%) | 8 (20.5%) |
| 4  | Other reason                                                                                                     | 27 (13%) | 3 (8%)    |
| 5  |                                                                                                                  |          |           |
| 6  | I am using it as childcare and I only need them in part time                                                     | 24 (12%) | 6 (15%)   |
| 7  | I am only sending them in on days when I can arrange transport                                                   | 23 (11%) | 4 (10%)   |
| 8  | Someone else at the school developed coronavirus symptoms (cough or fever, or change in sense of taste or smell) | 14 (7%)  | 1 (3%)    |
| 9  | I started sending them in, but have now changed my mind                                                          | 13 (6%)  | 2 (5%)    |
| 10 |                                                                                                                  |          |           |
| 11 | They have developed coronavirus symptoms (cough or fever, or change in sense of taste or smell)                  | 13 (6%)  | 1 (3%)    |
| 12 | Someone else in the family developed coronavirus symptoms (cough or fever, or change in sense of taste or smell) | 12 (6%)  | 0 (0%)    |
| 13 |                                                                                                                  |          |           |
| 14 | I am only sending them in on days when their friends are in                                                      | 11 (5%)  | 6 (15%)   |
| 15 | My child developed symptoms of a different illness                                                               | 9 (4%)   | 0 (0%)    |
| 16 |                                                                                                                  |          |           |
| 17 | They only live with me part time                                                                                 | 6 (3%)   | 1 (3%)    |
| 18 |                                                                                                                  |          |           |
| 19 |                                                                                                                  |          |           |
| 20 |                                                                                                                  |          |           |
| 21 |                                                                                                                  |          |           |
| 22 |                                                                                                                  |          |           |
| 23 |                                                                                                                  |          |           |
| 24 |                                                                                                                  |          |           |
| 25 |                                                                                                                  |          |           |
| 26 |                                                                                                                  |          |           |
| 27 |                                                                                                                  |          |           |
| 28 |                                                                                                                  |          |           |
| 29 |                                                                                                                  |          |           |
| 30 |                                                                                                                  |          |           |
| 31 |                                                                                                                  |          |           |
| 32 |                                                                                                                  |          |           |
| 33 |                                                                                                                  |          |           |
| 34 |                                                                                                                  |          |           |
| 35 |                                                                                                                  |          |           |
| 36 |                                                                                                                  |          |           |
| 37 |                                                                                                                  |          |           |
| 38 |                                                                                                                  |          |           |
| 39 |                                                                                                                  |          |           |
| 40 |                                                                                                                  |          |           |
| 41 |                                                                                                                  |          |           |
| 42 |                                                                                                                  |          |           |
| 43 |                                                                                                                  |          |           |
| 44 |                                                                                                                  |          |           |
| 45 |                                                                                                                  |          |           |
| 46 |                                                                                                                  |          |           |
| 47 |                                                                                                                  |          |           |
| 48 |                                                                                                                  |          |           |
| 49 |                                                                                                                  |          |           |
| 50 |                                                                                                                  |          |           |
| 51 |                                                                                                                  |          |           |
| 52 |                                                                                                                  |          |           |
| 53 |                                                                                                                  |          |           |
| 54 |                                                                                                                  |          |           |
| 55 |                                                                                                                  |          |           |
| 56 |                                                                                                                  |          |           |
| 57 |                                                                                                                  |          |           |
| 58 |                                                                                                                  |          |           |
| 59 |                                                                                                                  |          |           |
| 60 |                                                                                                                  |          |           |



**Full Survey Material**

D1. Please type your age on your last birthday: [number]

**Screenout if D1 = <18**

Q1. Which country do you live in? [single code]

- a. England
- b. Scotland
- c. Wales
- d. Northern Ireland
- e. Outside of the UK

**Screenout if Q1 = b-e**

Q2. Which region do you live in? [single code]

- a. East Midlands
- b. East of England
- c. London
- d. North East
- e. North West
- f. South East
- g. South West
- h. West Midlands
- i. Yorkshire and the Humber

Q3. Are you the parent or guardian of a child who usually attends school (that is, before the coronavirus outbreak occurred) and who lives with you? [single code]

- a. Yes
- b. No

**Screenout if Q3 = b**

Q4. Which of the following age groups do your children who live with you fall into? Please tick any that apply. [multi code]

- a. 0-3
- b. 4-11
- c. 12-18
- d. None of the above [exclusive]

**Screenout if b OR c not selected**

Q5. The Government has categorised some people as “critical workers” or “key workers.” For example, this includes people working in health and social care, education, key public services, transport, food distribution and other jobs. As far as you know, are you, or a spouse/partner, a “critical” or “key” worker? Please tick any that apply. [multi code]

- a. Yes, me
- b. Yes, spouse/partner
- c. No [exclusive]
- d. Don't know [exclusive]

IF Q4 = b

Q6. You stated that you have at least one child aged 4-11 who lives with you. Are any of your children who live with you in the following school years? Please tick any that apply. [multi code]

- a. Reception
- b. Year 1
- c. Year 6

- 1  
2  
3 d. I have no children in the school years listed above [exclusive]

4  
5 IF 2 or more options are selected at Q6

6 Q7. Thinking only about your children in Reception, Year 1 or Year 6, who live with you, which child had the  
7 most recent birthday? If the most recent birthday was shared by more than one child (e.g. twins, or children born  
8 on the same day in different years), please answer the following questions thinking about one of these children  
9 only. [single code]

- 10  
11 a. My child in Reception  
12 b. My child in Year 1  
13 c. My child in Year 6

14 ONLY SHOW OPTIONS SELECTED AT Q6

15  
16 IF Q6 = a-c

17 Q8. Can you please tell us how old that child is? [single code]

- 18  
19 a. 4  
20 b. 5  
21 c. 6  
22 d. 7  
23 e. 8  
24 f. 9  
25 g. 10  
26 h. 11

27  
28 IF Q6 = a-c

29 Q9. Can you please tell us if that child is a: [single code]

- 30  
31 a. Boy  
32 b. Girl

33  
34 IF Q6 = a-c

35 Q10. Can you please tell us the type of school that child usually attends? [single code]

- 36  
37 a. Fee-paying  
38 b. State-funded school  
39 c. Don't know

40  
41 IF Q6 = a-c

42 Q11A. Thinking about that child, have they attended school at all in the past 7 days? [single code]

- 43  
44 a. Yes, on 5 days  
45 b. Yes, on 1 to 4 days  
46 c. No  
47 d. Don't know

48  
49 IF Q11A = a/b

50 Q12A. You said that your child has attended school on at least one day in the past week. For which reasons did  
51 you send your child to school? Please tick any that apply [multi code]:

52 RANDOMISE ORDER OF STATEMENTS, anchor other to bottom

- 53  
54 a) It is compulsory for my child to attend  
55 b) I need to work  
56 c) I have non-work commitments I need to meet  
57 d) My child's education will benefit from being at school  
58 e) My child will benefit from seeing their friends  
59 f) Having my child at home is a strain  
60 g) I don't believe my child will be at risk at school

- 1  
2  
3 h) My child wants to go to school  
4 i) I think friends, family or other parents will judge me if I don't send my child to school  
5 j) It reduces costs at home  
6 k) Other reason [write in]  
7

8 IF Q11A = b

9 Q13A. You said that your child has not attended school every day in the past week. For which reasons are they  
10 attending only part-time? Please tick any that apply [multi code]:  
11

12 RANDOMISE ORDER OF STATEMENTS, anchor other to bottom

- 13 a) I am using it as childcare and I only need them in part time  
14 b) It is less risky for them to be in part-time  
15 c) The school only offers for them to be in part-time  
16 d) I am only sending them in on days where the lessons are important  
17 e) I am only sending them in on days when their friends are in  
18 f) I am only sending them in on days when I can arrange transport  
19 g) They only live with me part time  
20 h) I started sending them in, but have now changed my mind  
21 i) They have developed coronavirus symptoms (cough or fever, or change in sense of taste or smell)  
22 j) My child developed symptoms of a different illness  
23 k) Someone else in the family developed coronavirus symptoms (cough or fever, or change in sense of  
24 taste or smell)  
25 l) Someone else at the school developed coronavirus symptoms (cough or fever, or change in sense of  
26 taste or smell)  
27 m) Other reason [write in]  
28

29 IF Q11A = c

30 Q14A. You said that your child has not attended school in the past week. For which reasons did you not send  
31 your child to school? Please tick any that apply [multi code]:  
32

33 RANDOMISE ORDER OF STATEMENTS, anchor other to bottom

- 34 a) Someone in my household is clinically vulnerable to coronavirus  
35 b) I think it is too risky for my child to attend school at the moment  
36 c) The school is not open  
37 d) The school has asked my child not to attend  
38 e) My child doesn't want to go  
39 f) I think friends, family or other parents will judge me if I send my child to school  
40 g) I think they will get a better education at home than at school at the moment  
41 h) Being at school will be stressful for my child  
42 i) My child's friends will not be at school  
43 j) I have another child who can't go to school  
44 k) I can't arrange transport to get them to school  
45 l) There's no point, schools will shut again soon anyway  
46 m) They have developed coronavirus symptoms (cough or fever, or change in sense of taste or smell)  
47 n) My child developed symptoms of a different illness  
48 o) Someone else in the family developed coronavirus symptoms (cough or fever, or change in sense of  
49 taste or smell)  
50 p) Someone else at the school developed coronavirus symptoms (cough or fever, or change in sense of  
51 taste or smell)  
52 q) Other reason [write in]  
53

54 IF Q11A = a/b

55 Q15A. In this question we are interested in things that happened on the most recent day that your child went to  
56 school. Please remember that this survey is anonymous – please be honest in your answers. Please tick any that  
57 apply. [multi code]  
58

59 RANDOMISE ORDER OF STATEMENTS, anchor none of these to bottom  
60

- 1  
2  
3 a) Either on the way to or from school, or at the school gates, I had physical contact with someone  
4 that I don't live with  
5 b) Either on the way to or from school, or at the school gates, I was within 1 metre of someone that I  
6 don't live with for 1 minute or longer  
7 c) Either on the way to or from school, or at the school gates, I was between 1 and 2 metres of  
8 someone that I don't live with for 15 minutes or longer  
9 d) My child used public transport to get to or from school.  
10 e) My child shared a lift in a car with another family to get to or from school.  
11 f) I gave a lift in a car to a child from another family to get them to or from school.  
12 g) My child washed their hands as soon as they got home from school.  
13 h) My child had a shower or bath as soon as they got home from school.  
14 i) I washed my child's clothes after they got home from school.  
15 j) None of these [exclusive]

16 IF Q11A = a/b

17  
18 Q16A. Thinking about the facilities or procedures at your child's school. Which of the following, if any, are  
19 actually happening as far as you are aware?

20 Please tick all that apply [multi code]

21  
22 RANDOMISE ORDER OF STATEMENTS, anchor none of these to bottom

- 23  
24 a) There are hand washing facilities or hand gel dispensers at the entrance to the school that are working  
25 b) There are hand washing facilities or hand gel dispensers at the entrance to the classrooms that are  
26 working  
27 c) Children's hand washing or hand gel use is being monitored at school  
28 d) My child's class sizes is now 15 or fewer  
29 e) Children need to take in their own food and snacks  
30 f) Children are having their temperature checked on the way in  
31 g) The school has used markings or barriers to help children keep their distance from each other  
32 h) None of these are happening at my child's school [exclusive]

33 Q17. For the next series of questions, we would like you to think about one of your children who usually goes to  
34 school (that is, before the coronavirus outbreak occurred). If you have more than one child who usually went to  
35 school, then please answer about your child with the most recent birthday. If the most recent birthday was  
36 shared by more than one child (e.g. twins, or children born on the same day in different years), please answer  
37 the following questions thinking about one of these children only.  
38

39 Firstly, can you tell us the first name of your child. This is just so we can refer to them throughout the survey.  
40 You can give a fake name if you would prefer. [open]

41 \_\_\_\_\_  
42

43 Q18. How old is [CHILD]? [single code]

- 44  
45 a. 4  
46 b. 5  
47 c. 6  
48 d. 7  
49 e. 8  
50 f. 9  
51 g. 10  
52 h. 11  
53 i. 12  
54 j. 13  
55 k. 14  
56 l. 15  
57 m. 16  
58 n. 17  
59 o. 18  
60

1  
2  
3 Q19. What year is [CHILD] in at school [single code]  
4

- 5 a. Reception  
6 b. Year 1  
7 c. Year 2  
8 d. Year 3  
9 e. Year 4  
10 f. Year 5  
11 g. Year 6  
12 h. Year 7  
13 i. Year 8  
14 j. Year 9  
15 k. Year 10  
16 l. Year 11  
17 m. Year 12  
18 n. Year 13

19 Q20. Is [CHILD] a: [single code]

- 20 a. Boy  
21 b. Girl  
22

23 Q21. What type of school does [CHILD] normally attend? [single code]

- 24 a. Fee-paying  
25 b. State-funded school  
26 c. Don't know  
27

28 If Q5 = a/b AND [Q4 ≠ b or Q6 = d]

29 Q11B. Has [CHILD] attended school at all in the past 7 days? [single code]

- 30 a. Yes, on 5 days  
31 b. Yes, on 1 to 4 days  
32 c. No  
33 d. Don't know  
34  
35

36 IF Q11B = a/b

37 Q12B. You said that [CHILD] has attended school on at least one day in the past week. For which reasons did  
38 you send [CHILD] to school? Please tick any that apply [multi code]:  
39

40 RANDOMISE ORDER OF STATEMENTS, anchor other to bottom

- 41 a) It is compulsory for my child to attend  
42 b) I need to work  
43 c) I have non-work commitments I need to meet  
44 d) My child's education will benefit from being at school  
45 e) My child will benefit from seeing their friends  
46 f) Having my child at home is a strain  
47 g) I don't believe my child will be at risk at school  
48 h) My child wants to go to school  
49 i) I think friends, family or other parents will judge me if I don't send my child to school  
50 j) It reduces costs at home  
51 k) Other reason [write in]  
52

53 IF Q11B = b

54 Q13B. You said that [CHILD] has not attended school every day in the past week. For which reasons is  
55 [CHILD] attending only part-time? Please tick any that apply [multi code]:  
56

57 RANDOMISE ORDER OF STATEMENTS, anchor other to bottom

- 58 a) I am using it as childcare and I only need them in part time  
59 b) It is less risky for them to be in part-time  
60

- c) The school only offers for them to be in part-time
- d) I am only sending them in on days where the lessons are important
- e) I am only sending them in on days when their friends are in
- f) I am only sending them in on days when I can arrange transport
- g) They only live with me part time
- h) I started sending them in, but have now changed my mind
- i) They have developed coronavirus symptoms (cough or fever, or change in sense of taste or smell)
- j) My child developed symptoms of a different illness
- k) Someone else in the family developed coronavirus symptoms (cough or fever, or change in sense of taste or smell)
- l) Someone else at the school developed coronavirus symptoms (cough or fever, or change in sense of taste or smell)
- m) Other reason [write in]

IF Q11B = c

Q14B. You said that [CHILD] has not attended school in the past week. For which reasons did you not send [CHILD] to school? Please tick any that apply [multi code]:

RANDOMISE ORDER OF STATEMENTS, anchor other to bottom

- a) Someone in my household is clinically vulnerable to coronavirus
- b) I think it is too risky for my child to attend school at the moment
- c) The school is not open
- d) The school has asked my child not to attend
- e) My child doesn't want to go
- f) I think friends, family or other parents will judge me if I send my child to school
- g) I think they will get a better education at home than at school at the moment
- h) Being at school will be stressful for my child
- i) My child's friends will not be at school
- j) I have another child who can't go to school
- k) I can't arrange transport to get them to school
- l) There's no point, schools will shut again soon anyway
- m) They have developed coronavirus symptoms (cough or fever, or change in sense of taste or smell)
- n) My child developed symptoms of a different illness
- o) Someone else in the family developed coronavirus symptoms (cough or fever, or change in sense of taste or smell)
- p) Someone else at the school developed coronavirus symptoms (cough or fever, or change in sense of taste or smell)
- q) Other reason [write in]

IF Q11B = a/b

Q15B. In this question we are interested in things that happened on the most recent day that [CHILD] went to school. Please remember that this survey is anonymous – please be honest in your answers. Please tick any that apply. [multi code]

RANDOMISE ORDER OF STATEMENTS, anchor none of these to bottom

- a) Either on the way to or from school, or at the school gates, I had physical contact with someone that I don't live with
- b) Either on the way to or from school, or at the school gates, I was within 1 metre of someone that I don't live with for 1 minute or longer
- c) Either on the way to or from school, or at the school gates, I was between 1 and 2 metres of someone that I don't live with for 15 minutes or longer
- d) My child used public transport to get to or from school.
- e) My child shared a lift in a car with another family to get to or from school.
- f) I gave a lift in a car to a child from another family to get them to or from school.
- g) My child washed their hands as soon as they got home from school.
- h) My child had a shower or bath as soon as they got home from school.
- i) I washed my child's clothes after they got home from school.
- j) None of these [exclusive]

1  
2  
3 IF Q11B = a/b  
4

5 Q16B. Thinking about the facilities or procedures at [CHILD]'s school. Which of the following, if any, are  
6 actually happening as far as you are aware? Please tick any that apply. [multi code]  
7

8 RANDOMISE ORDER OF STATEMENTS, anchor none of these to bottom  
9

- 10 a) There are hand washing facilities or hand gel dispensers at the entrance to the school that are working  
11 b) There are hand washing facilities or hand gel dispensers at the entrance to the classrooms that are  
12 working  
13 c) Children's hand washing or hand gel use is being monitored at school  
14 d) My child's class size is now 15 or fewer  
15 e) Children need to take in their own food and snacks  
16 f) Children are having their temperature checked on the way in  
17 g) The school has used markings or barriers to help children keep their distance from each other  
18 h) None of these are happening at [CHILD]'s school [exclusive]

19 Q22. Does [CHILD] have special educational needs? [single code]  
20

- 21 - Yes  
22 - No  
23 - Don't know / prefer not to say  
24

25 Q23. In the past 7 days, how many times, if at all, has [CHILD] left your home for each of the following  
26 reasons? [multi code]  
27

- 28 a) To go to the shops for groceries, toiletries or medicines  
29 b) To go to the shops for other items  
30 c) For exercise  
31 d) For a medical need (e.g. an outpatient appointment)  
32 e) To go to school  
33 f) To provide help to someone else  
34 g) To meet friends  
35 h) To meet family members who don't live with you  
36 i) For another reason

37 Q24. In the past 7 days, have you done the following, because of the risk from coronavirus:  
38

39 SCALE

- 40 - Yes  
41 - No  
42

43 STATEMENTS – RANDOMISE  
44

- 45 a. Washed your hands thoroughly and regularly  
46 b. Stayed 2m (3 steps) away from people you do not live with when outside your home  
47 c. Washed your clothes when you have returned home  
48 d. Washed [CHILD]'s clothes when she/ he has returned home  
49 e. Used tissues or clothing to touch door handles or other objects when outside  
50 f. Cleaned or disinfected items you have brought into the home, such as groceries or parcels  
51 g. Left items that you have brought into the home for 24 hours or more before using them, to kill any  
52 virus on them  
53 h. Covered your face or used a face mask when out and about  
54 i. Covered [CHILD]'s face or given her/him a face mask when out and about  
55 j. Worn protective gloves when out and about  
56 k. Made [CHILD] wear protective gloves when out and about  
57  
58  
59  
60

Q25. We are interested in how many people [CHILD] has had close contact with in the past 24 hours. By close contact we mean closer than 2 meters, for fifteen minutes or more. Please remember, this survey is anonymous so please be honest.

In the past 24 hours, how many people in the following categories has [CHILD] had close contact with: [multi code]

- a. Someone [CHILD] lives with
- b. Friends or other children who [CHILD] does not live with
- c. A family member aged under 70 who [CHILD] does not live with
- d. A family member aged over 70 who [CHILD] does not live with
- e. A babysitter, nanny or childminder
- f. Other children, not already reported above
- g. Other adults, not already reported above

Q26. Did [CHILD] attend school in the past 24 hours? [single code]

- a. Yes
- b. No

#### RANDOMISE ORDER OF Q27a AND Q27b SHOWN TO EACH RESPONDENT

Q27a. How much, if at all, do you agree or disagree with the following statements:

STATEMENTS (randomise order):

- a) If [CHILD] goes out, she/he is likely to catch coronavirus
- b) If [CHILD] goes out, she/he is likely to bring coronavirus back into our home
- c) [CHILD] is keeping up with her/his schoolwork
- d) I feel confident helping [CHILD] with her/his schoolwork
- e) I feel supported by [CHILD's] school
- f) I have access to all the resources that [CHILD] needs to do her/his schoolwork
- g) During lockdown, [CHILD] has learned about important things she/he wouldn't normally learn at school.
- h) In the past 7 days, [CHILD] has been bored

SCALE

- Strongly agree
- Tend to agree
- Neither agree nor disagree
- Tend to disagree
- Strongly disagree
- Not applicable

Q27b. How much, if at all, do you agree or disagree with the following statements:

STATEMENTS (randomise order):

- a) In the past 7 days, my household has had a regular structure to the day
- b) In the past 7 days, [CHILD] has kept in touch with her/his friends
- c) [CHILD] is worried about coronavirus
- d) In the past 7 days, [CHILD] has felt upset about not seeing other family members who do not live with us
- e) In the past 7 days, I have found it hard to keep up with work or other important commitments
- f) In the past 7 days, people in my household have been getting along well
- g) I am worried about the financial impact of lockdown measures
- h) Before the school closures, [CHILD] had extra support at school

SCALE

- Strongly agree
- Tend to agree



- Neither agree nor disagree
- Tend to disagree
- Strongly disagree
- Not applicable

Q28. To what extent, if at all, do you agree or disagree with the following statements?

RANDOMISE ORDER OF STATEMENTS

- a) If it were possible, I would feel comfortable sending [CHILD] to school next week.
- b) If it were possible, I would want to send [CHILD] to school next week.
- c) There is still too much coronavirus around for schools to be able to reopen safely
- d) When [CHILD's] school fully reopens, some parents will send their children to school, even if they have symptoms of coronavirus
- e) It is impossible for children to maintain 'social distancing' at school
- f) Children will not wash their hands properly at school
- g) Staff will not wash their hands properly at school
- h) Schools will not be able to provide good quality education at the moment
- i) School will not be an enjoyable place for [CHILD] to be at the moment

SCALE

- Strongly agree
- Tend to agree
- Neither agree nor disagree
- Tend to disagree
- Strongly disagree
- Not applicable

Q29A. Has [CHILD] had any of the following symptoms in the past 7 days? Please tick any that apply, no matter where you think the symptoms came from, and even if the symptoms were mild. [multi code]

RANDOMISE ORDER OF STATEMENTS, anchor "none of these" and "don't know" to bottom

- New, continuous cough
- High temperature / fever
- Runny nose
- Diarrhoea
- Nausea / feeling sick
- Vomiting
- Sneezing
- Loss of appetite
- Loss of sense of smell (fully or partial)
- Loss of taste
- None of these
- Don't know

Q29B. Have you, or anyone else in your household (excluding [CHILD]) had any of the following symptoms in the past 14 days? Please tick any that apply, no matter where you think the symptoms came from, and even if the symptoms were mild. [multi code]

RANDOMISE ORDER OF STATEMENTS, anchor "none of these" and "don't know" to bottom

- New, continuous cough
- High temperature / fever
- Runny nose
- Diarrhoea
- Nausea / feeling sick
- Vomiting
- Sneezing
- Loss of appetite
- Loss of sense of smell (fully or partial)

- Loss of taste
- None of these
- Don't know

Q30. Do you know if [CHILD] has had, or currently has, coronavirus? (Please select the option that BEST applies) [single code]

- a) They have definitely had it or definitely have it now
- b) They have probably had it or probably have it now
- c) They have probably not had it and probably don't have it now
- d) They have definitely not had it and definitely don't have it now

#### RANDOMISE ORDER OF Q31a AND Q31b SHOWN TO EACH RESPONDENT

Q31a. Please tell us how often each of these things happen to [CHILD]. There are no right or wrong answers.

##### SCALE

- *Never*
- *Sometimes*
- *Often*
- *Always*

##### STATEMENTS

- My child worries about things
- My child worries that something awful will happen to someone in the family
- My child worries that bad things will happen to him/her
- My child feels sad or empty
- Nothing is much fun for my child anymore
- My child has trouble sleeping
- My child has problems with his/her appetite
- My child has no energy for things

Q31b. Please tell us how often each of these things happen to [CHILD]. There are no right or wrong answers.

##### SCALE

- *Never*
- *Sometimes*
- *Often*
- *Always*

##### STATEMENTS

- My child worries that something bad will happen to him/her
- My child worries about what is going to happen
- My child thinks about death
- My child is tired a lot
- My child cannot think clearly
- My child feels worthless
- My child feels like he/she doesn't want to move
- My child feels restless

Q32. Thinking about next flu season (September 2020 – March 2021). During this time, you may be invited to vaccinate [CHILD] against flu. All primary school, but not secondary school children, are eligible for the child flu vaccine. For the following questions, please think about the next flu season.

For each of the following statements, please tell us to what extent, if at all, you agree or disagree:

I want [CHILD] to be vaccinated for flu next year (2020/21)

- Strongly agree
- Agree
- Neither agree nor disagree

- Disagree
- Strongly disagree
- Not applicable, [CHILD] will be in secondary school in next school year (2020/21)

IF Q32 = a-e

Q33 I intend [CHILD] to be vaccinated for flu next year (2020/21)

- Strongly agree
- Agree
- Neither agree nor disagree
- Disagree
- Strongly disagree
- Not applicable, [CHILD] will be in secondary school in next school year (2020/21)

Thinking now about yourself...

Q34. Over the last 2 weeks, how often have you been bothered by the following problems?

SCALE

- Not at all
- Several days
- More than half the days
- Nearly every day

STATEMENTS

- Feeling nervous, anxious or on edge
- Not being able to stop or control worrying
- Little interest or pleasure in doing things
- Feeling down, depressed, or hopeless

And finally, the following questions ask for some more information about you and your household.

D2. Which gender do you identify yourself with? [single code]

- Male
- Female
- Prefer to self-describe
- Prefer not to say

D3. What is your employment status? [single code]

- a. Full time paid job (31+ hours)
- b. Part time paid job (<31 hours)
- c. Doing paid work on a self-employed basis or within your own business
- d. Employed, but currently furloughed
- e. Student / On a government training programme (Nation Traineeship/Modern Apprenticeship)
- f. Out of work (6 months or less)
- g. Out of work (more than 6 months)
- h. Looking after home / Homemaker
- i. Retired
- j. Disabled OR Long-term sick
- k. Unpaid work for a business, community or voluntary organisation
- l. Prefer not to say

If answer a/b/c to D3

D4. Are you currently working from home? [single code]

- Yes
- No

1  
2  
3 D5. What is the highest level of educational qualification you have received? [single code]  
4

- 5 a. PhD/Doctor  
6 b. Master's  
7 c. Bachelor's Degree or equivalent (Such as a NVQ level 5)  
8 d. Higher education (Such as a HND or a NVQ level 4)  
9 e. A level or equivalent (Such as Scottish Highers or NVQ level 3)  
10 f. GCSE and below (Such as O level or an RSA Diploma)  
11 g. Other qualifications (Such as NVQ level 1)  
12 h. No qualifications  
13 i. Prefer not to say

14 D6. Which of the following income brackets best represents your household income, before tax deductions for  
15 income tax, National Insurance etc? [single code]  
16

- 17 a. Less than £5,000  
18 b. £5,000-£9,999  
19 c. £10,000-£14,999  
20 d. £15,000-£19,999  
21 e. £20,000-£24,999  
22 f. £25,000-£29,999  
23 g. £30,000-£34,999  
24 h. £35,000-£39,999  
25 i. £40,000-£44,999  
26 j. £45,000-£49,999  
27 k. £50,000-£59,999  
28 l. £60,000-£69,999  
29 m. £70,000-£84,999  
30 n. £85,000-£99,999  
31 o. More than £100,000  
32 p. Prefer not to say

33 D7. What is your current marital or civil partnership status? [single code]

- 34 a. Single (i.e. never married and never registered as a same sex civil-partnership)  
35 b. Co-habiting with partner (but never married or been in a civil partnership)  
36 c. Civil partnership  
37 d. Married  
38 e. Separated, but still legally married / in a civil partnership  
39 f. Divorced / Civil partnership legally dissolved  
40 g. Widowed / Surviving partner from a same-sex civil partnership

41 D8. Which of the following categories would best describe your ethnicity? [single code]  
42

- 43 a. English/Welsh/Scottish/Northern Irish/British  
44 b. Irish  
45 c. Gypsy or Irish Traveller  
46 d. Other  
47 e. White and Black Caribbean  
48 f. White and Black African  
49 g. White and Asian  
50 h. Other  
51 i. Indian  
52 j. Pakistani  
53 k. Bangladeshi  
54 l. Chinese  
55 m. Other  
56 n. Caribbean  
57 o. African  
58 p. Other  
59 q. Arab  
60 r. Any other (please specify)  
s. Prefer not to say

1  
2  
3 D10. How many children in each age group live in your household? [number list]  
4

- 5 - 0-3
- 6 - 4-10
- 7 - 11-15
- 8 - 16-18

9 Allow numerical input for each age group  
10

11 D11. Do you live with anyone over the age of 70 years? [single code]

- 12 a. Yes
- 13 b. No

14  
15 D12. Including yourself, how many people live in your household? [single code]

- 16 a. 2
- 17 b. 3
- 18 c. 4
- 19 d. 5
- 20 e. 6
- 21 f. 7
- 22 g. 8
- 23 h. 9
- 24 i. 10 or more

25  
26 D9. Do any of the following have a medical condition than might make them particularly vulnerable to  
27 coronavirus?

28 SCALE

- 29 - Yes
- 30 - No
- 31 - Don't know

32  
33 STATEMENTS

- 34 a. Yourself
- 35 b. [CHILD]
- 36 c. Anyone else you live with [show if D12 = b-i]

37  
38  
39 D13. [Record number] How many bedrooms does your home have?  
40

41 D14. [Multi code] Which of the following do you have access to at your home:

- 42 a) A garden
- 43 b) A patio / terrace
- 44 c) A balcony
- 45 d) Another form of outdoor space
- 46 e) No outdoor space

47  
48 Thank you for completing this survey. If you have any concerns about your child's mental health, please click  
49 [here](#).

1  
2  
3  
4  
5  
6  
7  
8  
9  
10  
11  
12  
13  
14  
15  
16  
17  
18  
19  
20  
21  
22  
23  
24  
25  
26  
27  
28  
29  
30  
31  
32  
33  
34  
35  
36  
37  
38  
39  
40  
41  
42  
43  
44  
45  
46  
47  
48  
49  
50  
51  
52  
53  
54  
55  
56  
57  
58  
59  
60

Confidential: For Review Only

# BMJ Paediatrics Open

## Why did some parents not send their children back to school following school closures during the COVID-19 pandemic: a cross-sectional survey

|                               |                                                                                                                                                                                                                                                                                                                    |
|-------------------------------|--------------------------------------------------------------------------------------------------------------------------------------------------------------------------------------------------------------------------------------------------------------------------------------------------------------------|
| Journal:                      | <i>BMJ Paediatrics Open</i>                                                                                                                                                                                                                                                                                        |
| Manuscript ID                 | bmjpo-2020-001014.R2                                                                                                                                                                                                                                                                                               |
| Article Type:                 | Original research                                                                                                                                                                                                                                                                                                  |
| Date Submitted by the Author: | 30-Apr-2021                                                                                                                                                                                                                                                                                                        |
| Complete List of Authors:     | Woodland, Lisa; Weston Education Centre<br>Smith, Louise; King's College London<br>Webster, Rebecca K; The University of Sheffield<br>Amlôt, Richard; Public Health England<br>Rubin, Antonia; Weald of Kent Grammar School<br>Wessely, Simon; Institute of Psychiatry Psychology and Neuroscience<br>Rubin, James |
| Keywords:                     | COVID-19, Psychology                                                                                                                                                                                                                                                                                               |
|                               |                                                                                                                                                                                                                                                                                                                    |

SCHOLARONE™  
Manuscripts

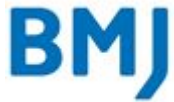

I, the Submitting Author has the right to grant and does grant on behalf of all authors of the Work (as defined in the below author licence), an exclusive licence and/or a non-exclusive licence for contributions from authors who are: i) UK Crown employees; ii) where BMJ has agreed a CC-BY licence shall apply, and/or iii) in accordance with the terms applicable for US Federal Government officers or employees acting as part of their official duties; on a worldwide, perpetual, irrevocable, royalty-free basis to BMJ Publishing Group Ltd ("BMJ") its licensees and where the relevant Journal is co-owned by BMJ to the co-owners of the Journal, to publish the Work in this journal and any other BMJ products and to exploit all rights, as set out in our [licence](#).

The Submitting Author accepts and understands that any supply made under these terms is made by BMJ to the Submitting Author unless you are acting as an employee on behalf of your employer or a postgraduate student of an affiliated institution which is paying any applicable article publishing charge ("APC") for Open Access articles. Where the Submitting Author wishes to make the Work available on an Open Access basis (and intends to pay the relevant APC), the terms of reuse of such Open Access shall be governed by a Creative Commons licence – details of these licences and which [Creative Commons](#) licence will apply to this Work are set out in our licence referred to above.

Other than as permitted in any relevant BMJ Author's Self Archiving Policies, I confirm this Work has not been accepted for publication elsewhere, is not being considered for publication elsewhere and does not duplicate material already published. I confirm all authors consent to publication of this Work and authorise the granting of this licence.



1  
2  
3 **Why did some parents not send their children back to school following school**  
4 **closures during the COVID-19 pandemic: a cross-sectional survey**  
5

6 Lisa Woodland MSc, King's College London, Weston Education Centre, Cutcombe  
7 Road, London SE5 9RJ, UK  
8

9 Louise E Smith PhD, King's College London, Weston Education Centre, Cutcombe  
10 Road, London SE5 9RJ, UK  
11

12 Rebecca K Webster PhD, University of Sheffield, Cathedral Court, 1 Vicar Lane,  
13 Sheffield, S1 2LT, UK  
14

15 Richard Amlôt PhD, Public Health England, Emergency Response Department,  
16 Porton Down, Salisbury, SP4 0JG, UK  
17

18 Antonia Rubin MA (Cantab), Trustee at Weald of Kent Grammar School, Tudeley  
19 Lane, Tonbridge, Kent, TN9 2JP, UK.  
20

21 Simon Wessely PhD, King's College London, Weston Education Centre, Cutcombe  
22 Road, London SE5 9RJ, UK  
23

24 G James Rubin PhD, King's College London, Weston Education Centre, Cutcombe  
25 Road, London SE5 9RJ, UK  
26  
27  
28  
29

30 Correspondence to: Lisa Woodland, King's College London, Weston Education  
31 Centre, Cutcombe Road, London SE5 9RJ, UK, [lisa.woodland@kcl.ac.uk](mailto:lisa.woodland@kcl.ac.uk)  
32  
33

34  
35 **Word Count: 2,635**  
36  
37  
38  
39  
40  
41  
42  
43  
44  
45  
46  
47  
48  
49  
50  
51  
52  
53  
54  
55  
56  
57  
58  
59  
60

## ABSTRACT

### Background

On 23<sup>rd</sup> March 2020, schools closed to most children in England in response to COVID-19 until September 2020. Schools were kept open to children of key workers and vulnerable children, on a voluntary basis. Starting 1<sup>st</sup> June 2020 children in reception (four to five years old), year one (five to six years old) and year six (10 to 11 years old) also became eligible to attend school.

### Methods

1,373 parents or guardians of children eligible to attend school completed a cross-sectional survey between 8<sup>th</sup> and 11<sup>th</sup> June 2020. We investigated factors associated with whether children attended school or not.

### Results

46% (n=370 / 803) of children in year-groups eligible to attend school and 13% (n=72 / 570) of children of key workers had attended school in the past seven days. The most common reasons for sending children to school were that the child's education would benefit, the child wanted to go to school, and the parent needed to work. A child was significantly more likely to attend if the parent believed the child had already had COVID-19, they had special educational needs, or a person in the household had COVID-19 symptoms.

### Conclusions

Following any future school closure, helping parents to feel comfortable returning their child to school will require policy makers and school leaders to communicate about the adequacy of their policies to: a) ensure that the risk to children in school is minimised; b) ensure that the educational potential within schools is maximised; and c) ensure that the benefits of school for the psychological well-being of children are prioritised.

### Key Words

Child; COVID-19; parents; school closures; England; cross-sectional studies

## ARTICLE ADDS

### What is known about the subject

The COVID-19 pandemic resulted in the mass closure of schools for an extended period of time. A previous systematic review assessed parental attitudes towards smaller scale closures, finding that many parents (71%-97% across six studies) approved of closures, particularly where they were seen as an effective protective measure against a serious illness. The effect on a child's education and ability of the parent to work were reported as concerns.

### What this study adds

During the partial reopening of schools in England in June 2020, most parents did not send their children to school. Parents who were not educated to degree level, not working, who lived in the North of England or who were from Black, Asian and ethnic minority backgrounds were least likely to send their children back. Perceived benefits of education, risk of disease and children's well-being were the main drivers in determining parental decision to send them to school or not.

## INTRODUCTION

On 23<sup>rd</sup> March 2020, a nationwide closure of schools occurred across England in response to the COVID-19 pandemic. Only vulnerable children (those with a health care plan or social worker) and children of key workers (critical to the COVID-19 response) were able to attend.[1,2] From 1<sup>st</sup> June 2020 children in reception (four to five years), year one (five to six years) and year six (10 to 11 years) also became eligible to attend.[3] Until September 2020 school attendance was voluntary to those children eligible to attend.[4]

The benefits of closing schools to reduce the transmission of COVID-19 and the negative consequences of doing so were difficult to balance.[5,6] Adding to the debate was emerging evidence of a low transmission rate of COVID-19 among children [7-10] and a recognition that outbreaks may occur nonetheless.[11,12]

Irrespective of this debate, it was clear that many parents felt far from comfortable with their children attending school in the first months of the pandemic, even where it was encouraged.[13] A worldwide systematic review of school closures suggests several factors that may be relevant to whether a child attended school during an infectious disease outbreak.[14] Nineteen papers were included in the review, samples representing between 67 and 4,171 school-aged children (five to 19 years). Perceived risk of infection,[15,16] concern about the impact of a closure on education,[15,17] and parental concerns about their child's mental health were key issues.[18] Understanding the key issues that determine whether a parent is willing to send their children back to school when it is partially open, and ensuring that school policies and communications address these concerns, should help inform re-opening schools, in this or any future pandemic.

In this study, we investigated factors associated with a parent's willingness to send their child to school when they partially re-opened, following closures due to the COVID-19 pandemic. We investigated these factors for children in reception, year one, or year six and for families where at least one parent was a key worker.

## METHODS

### Design

We commissioned a market research company, BMG Research to administer a cross-sectional survey one week after schools in England re-opened for children in reception, year one, and year six (8<sup>th</sup> to 11<sup>th</sup> June 2020).[19] We have previously reported data from this survey relating to parental perceptions of the presence of hygiene procedures within schools.[20]

### Participants

Participants (n=2,447) were recruited from BMG Research's panel and to achieve a sample broadly representative of the population, BMG Research monitored region, child age, child gender, parent/guardian age, and parent/guardian gender. Participants were eligible for the study if they were aged eighteen years or over, lived

1  
2  
3 in England, and were a parent or guardian to a school-aged child (4-18 years) who  
4 usually lived with them. 183 participants were screened out for non-eligibility, 226  
5 participants dropped out after starting the survey and 28 completed but were  
6 removed for quality control such as completing the survey quickly or for 'straight-  
7 lining' (selecting the same option for every question) suggesting inattention to the  
8 questions. 2,010 participants remained. The sample fell within five percentage points  
9 of the national population by the child's gender, key stage, and type of school  
10 attended against the known distribution for school children in England.[21] The  
11 sample used in this paper were 803 parents of children in eligible school years and  
12 570 parents from families in which at least one parent was a key worker (9  
13 participants were removed from this group due to logical inconsistencies which  
14 suggested they had accidentally completed the wrong section).

15  
16  
17  
18  
19 Participants were paid equivalent to £0.60.

## 20 21 **Study Materials**

22  
23 The full survey is available in the supplementary materials.

24  
25 Selection of a child to answer questions about

26  
27 All participants answered questions referring to their child who had the most recent  
28 birthday. In cases where children shared a birthday, we asked the parent to select  
29 one child.

30  
31 Our survey had two sections. Section one was only completed by parents who had a  
32 child in reception, year one, or year six or by parents who did not have a child in  
33 these year groups, but they or their spouse were a key worker. It contained  
34 questions about whether the child had attended school in the past week. Section two  
35 was completed by these parents and also by parents who did not have a child  
36 eligible to attend school. It contained general questions on views about risk of  
37 COVID-19, family living and school safety measures. In this paper we only report  
38 data from section one, relating to actual attendance in the past week.

### 39 40 41 *Personal Characteristics*

42  
43 We asked participants to report their gender, age, region, household income,  
44 employment status, marital status, ethnicity, and level of education. We also asked  
45 whether anyone within the household was aged over 70 years or had a health  
46 condition that made them vulnerable to COVID-19.

47  
48 We asked participants to report the child's gender, age, school year, school type  
49 (fee-paying or state-funded) and whether the child had special educational needs  
50 (SEN).

### 51 52 53 *School Attendance*

54  
55 Participants were asked how many times the child had attended school in the past  
56 seven days. Depending on the response, parents were presented with randomised  
57 statements: 10 for why they were sending the child to school; 12 for why they were  
58 only sending the child to school part-time; or 16 why their child was not attending  
59  
60

1  
2  
3 school. We asked participants to “tick any [statement] that applies”. Participants also  
4 had the option to write-in text for “other reason”.  
5

### 6 *COVID-19 Symptoms*

7  
8 We asked participants to report if the selected child had experienced any symptoms  
9 “in the past seven days” from a list of ten symptoms. We also asked if they or a  
10 household member (other than the child) had experienced symptoms “in the past 14  
11 days” from the same symptom list. We asked participants whether they thought their  
12 child had had COVID-19.  
13  
14

### 15 *Well-Being*

16  
17 We asked participants to report the child’s well-being using two subscales from the  
18 Revised Child Anxiety Disorder Scale (RCADS):[22] the generalised anxiety disorder  
19 (GAD) sub-scale and the major depressive disorder (MDD) sub-scale.  
20  
21

## 22 **ETHICS**

23  
24 The research was approved by the Psychiatry, Nursing and Midwifery Research  
25 Ethics Subcommittee at King’s College London (LRS—19/20-18787).  
26  
27

## 28 **PATIENT AND PUBLIC INVOLVEMENT.**

29  
30 A school trustee contributed to the development of the survey materials and co-  
31 authored this paper.  
32  
33

## 34 **ANALYSIS**

### 35 *Recoding of variables*

36  
37 School attendance was defined as a child who attended school for at least one day,  
38 in the past seven days.  
39  
40

41 We created two binary variables to indicate whether the child, and someone in the  
42 household (other than the child) had a health condition that might make them  
43 particularly vulnerable to COVID-19.  
44

45 We created two binary variables to indicate recent presence of COVID-19 symptoms  
46 in the child, and someone else in the household. We defined presence of COVID-19  
47 symptoms as experiencing a “new, continuous cough”, “high temperature / fever”,  
48 “loss of sense of smell (fully or partial)”, or “loss of taste”. We coded a binary variable  
49 for the parent’s perception of whether the child had had COVID-19 by grouping  
50 together “they have definitely had it or definitely have it now” and “they have  
51 probably had it or probably have it now”.  
52  
53

54 We created a binary variable to indicate low well-being in the child. We assigned a  
55 value against each answer from 0 (“never”) to 3 (“always”) on the GAD and MDD  
56 RCADS sub-scales and created a total score for each sub-scale. We then turned  
57 each total score into a t-score, a method used to normalise RCADS scores within the  
58 population, by child’s age and gender.[22,23] We used the same process for  
59  
60

reception to year three as for year four. We used a t-score cut off of 65 or above on either GAD or MDD sub-scales to indicate low well-being.

For all variables, we coded the responses “don’t know”, “not applicable”, “prefer not to say” and “prefer to self-describe” as missing data.

### *Analysis*

We ran a series of binary logistic regressions using SPSS v26.0,[24] investigating univariable associations between each of our predictor variables and sending the child to school. We ran a second set of binary logistic regressions controlling for personal characteristics shown in the results.

We analysed frequencies for the statements responding to sending the child to school for a full week (five days), part-time (less than five days), and for not sending the child to school.

For ease of interpretation, we used unweighted data in our analysis.

We applied a Bonferroni correction to our results ( $p \leq .001$ ) due to running many analyses (children in school years  $n=29$  and children of key workers  $n=31$ ). Results meeting this criterion are marked by a double asterisk (\*\*) in the tables.

### **Sample size calculation**

Post-hoc calculations were run on the two sub-samples which had a margin of error of plus or minus 5% at the 95% confidence level for each prevalence estimate.

## **RESULTS**

### **School attendance**

Nearly half (46% CI, 43% to 50%,  $n=370/803$ ) of children in eligible school years had attended school and about half had not (54% 95% CI, 50% to 57%,  $n=432/803$ ). One participant was unsure if the child had attended school. The most common reasons for not sending a child to school were: thinking it was too risky for the child to attend school ( $n=223$ , 52%), the school not being open ( $n=140$ , 32%) and having another child who could not go to school ( $n=67$ , 16%). The most common reasons for sending a child to school were: the child’s education would benefit ( $n=208$ , 56%), the child wants to go to school ( $n=200$ , 54%), and the child will benefit from seeing their friends ( $n=187$ , 51%). Of participants whose child did not attend school for a full week ( $n=204$ , 25%) the most common reasons for partial attendance were: the school only offers them to be in part-time ( $n=80$ , 39%), it is less risky for them to be in part-time ( $n=40$ , 20%), and I am only sending them in on days where the lessons are important ( $n=28$ , 14%).

Only 13% (95% CI, 10% to 15%,  $n=72/570$ ) of children of key workers had attended school, most children had not (87% 95% CI, 85% to 90%,  $n = 497/570$ ). One participant was unsure if the child had attended school. The most common reasons for children not attending school were: the school was not open ( $n=259$ , 52%), the school had asked the child not to attend ( $n=117$ , 24%), and thinking that it was too

1  
2  
3 risky for the child to attend school at the moment (n=109, 22%). The most common  
4 reasons for attending school were: the parent needing to work (n=40, 56%), the child  
5 wanting to go to school (n=35, 49%), and thinking that the child's education would  
6 benefit from being at school (n=30, 42%). Of participants with children who attended  
7 school part-time the most common reasons were: the school only offered them to be  
8 in part-time (n=16, 41%), parent only sent them in on days where the lessons are  
9 important (n=8, 21%), and believing it was less risky for them to be in part-time (n=7,  
10 18%).  
11  
12

### 13 **Associations**

14  
15  
16 Participant characteristics for children in eligible school years and for children of key  
17 workers are shown in table 1. Parents of children in eligible school years were less  
18 likely to send the child to school if they were educated to A-level or below, not  
19 working, of Black, Asian and minority ethnicity (BAME), or living in the North East,  
20 North West, and Yorkshire and the Humber compared to London. Whereas children  
21 of key workers were more likely to attend school for participants aged 45 and under  
22 and who were working. Child attendance was more likely for children in eligible  
23 school years when in a fee-paying school and if they had a health condition that  
24 made them vulnerable to COVID-19. For both groups, attendance was more likely for  
25 children who had special educational needs, reported low well-being, thought their  
26 child had had COVID-19 and when a person over 70 was living in the household.  
27 There was also a significant association in both groups between a child being more  
28 likely to attend school and the child having experienced COVID-19 symptoms in the  
29 past 7 days, or another person in the household having experienced COVID-19  
30 symptoms in the past 14 days.  
31  
32  
33  
34  
35  
36  
37  
38  
39  
40  
41  
42  
43  
44  
45  
46  
47  
48  
49  
50  
51  
52  
53  
54  
55  
56  
57  
58  
59  
60



Table 1. Participant characteristics for children in eligible school years (n=803) and children of key workers (n=570), by school attendance.

| Level                          | Children in Eligible school years |                        |                     |                                | Children of key workers      |                        |                     |                                |                               |
|--------------------------------|-----------------------------------|------------------------|---------------------|--------------------------------|------------------------------|------------------------|---------------------|--------------------------------|-------------------------------|
|                                | Did not attend school, n (%)      | Attended School, n (%) | Odds ratio (95% CI) | Adjusted odds ratio (95% CI) † | Did not attend school, n (%) | Attended School, n (%) | Odds ratio (95% CI) | Adjusted odds ratio (95% CI) † |                               |
| Gender                         | Male                              | 201 (52)               | 187 (48)            | 1.22 (0.92 to 1.61)            | 1.04 (0.75 to 1.43)          | 227 (85)               | 39 (15)             | 1.53 (0.92 to 2.55)            | 1.61 (0.91 to 2.85)           |
|                                | Female                            | 230 (57)               | 177 (43)            | Reference                      | Reference                    | 268 (90)               | 30 (10)             | Reference                      | Reference                     |
| Age                            | 18-35 years                       | 129 (49)               | 136 (51)            | 1.37 (0.92 to 2.03)            | 1.23 (0.79 to 1.92)          | 54 (77)                | 16 (23)             | <b>3.16* (1.56 to 6.37)</b>    | <b>2.95* (1.23 to 7.08)</b>   |
|                                | 36-45 years                       | 212 (56)               | 164 (44)            | 1.01 (0.70 to 1.46)            | 0.98 (0.65 to 1.48)          | 198 (86)               | 33 (14)             | <b>1.76* (1.01 to 3.12)</b>    | <b>2.14* (1.12 to 4.09)</b>   |
|                                | 46 years ≥                        | 91 (56.5)              | 70 (43.5)           | Reference                      | Reference                    | 245 (91)               | 23 (9)              | Reference                      | Reference                     |
| Region                         | East Midlands                     | 33 (60)                | 22 (40)             | <b>0.50* (0.27 to 0.93)</b>    | 0.59 (0.31 to 1.14)          | 45 (85)                | 8 (15)              | 0.85 (0.32 to 2.22)            | 1.23 (0.40 to 3.75)           |
|                                | East of England                   | 38 (48)                | 41 (52)             | 0.81 (0.48 to 1.38)            | 0.92 (0.52 to 1.64)          | 54 (82)                | 12 (18)             | 1.06 (0.45 to 2.52)            | 1.38 (0.50 to 3.81)           |
|                                | North East                        | 33 (67)                | 16 (33)             | <b>0.36* (0.19 to 0.71)</b>    | <b>0.38* (0.21 to 0.78)</b>  | 32 (89)                | 4 (11)              | 0.60 (0.18 to 1.98)            | 0.93 (0.25 to 3.46)           |
|                                | North West                        | 68 (65)                | 36 (35)             | <b>0.40** (0.24 to 0.66)</b>   | <b>0.39* (0.23 to 0.68)</b>  | 80 (93)                | 6 (7)               | <b>0.36* (0.13 to 0.99)</b>    | 0.61 (0.19 to 1.89)           |
|                                | South East                        | 70 (51)                | 66 (49)             | 0.71 (0.45 to 1.11)            | 0.92 (0.56 to 1.52)          | 82 (89)                | 10 (11)             | 0.58 (0.24 to 1.94)            | 0.81 (0.29 to 2.29)           |
|                                | South West                        | 24 (46)                | 28 (54)             | 0.88 (0.47 to 1.63)            | 1.16 (0.58 to 2.31)          | 42 (87.5)              | 6 (12.5)            | 0.68 (0.42 to 1.94)            | 1.18 (0.37 to 3.82)           |
|                                | West Midlands                     | 39 (56)                | 30 (44)             | 0.58 (0.33 to 1.01)            | 0.63 (0.34 to 1.18)          | 48 (89)                | 6 (11)              | 0.60 (0.21 to 1.68)            | 0.84 (0.27 to 2.60)           |
|                                | Yorkshire & the Humber            | 52 (62)                | 31 (37)             | <b>0.45* (0.26 to 0.76)</b>    | <b>0.52* (0.29 to 0.93)</b>  | 52 (88)                | 7 (12)              | 0.64 (0.24 to 1.73)            | 0.80 (0.27 to 2.41)           |
|                                | London                            | 75 (43)                | 100 (57)            | Reference                      | Reference                    | 62 (83)                | 13 (17)             | Reference                      | Reference                     |
| Household income               | ≤ £34,999                         | 164 (54)               | 142 (46)            | 1.00 (0.75 to 1.33)            | 1.34 (0.95 to 1.90)          | 185 (89)               | 23 (11)             | 0.75 (0.44 to 1.28)            | 0.96 (0.51 to 1.81)           |
|                                | £35,000 ≥                         | 254 (54)               | 220 (46)            | Reference                      | Reference                    | 285 (86)               | 47 (14)             | Reference                      | Reference                     |
| Employment status <sup>1</sup> | Working                           | 362 (52)               | 337 (48)            | <b>1.95* (1.25 to 3.05)</b>    | <b>1.94* (1.16 to 3.24)</b>  | 435 (86)               | 70 (14)             | <b>9.33* (1.27 to 68.47)</b>   | <b>8.64* (1.13 to 65.96)</b>  |
|                                | Not working                       | 67 (68)                | 32 (32)             | Reference                      | Reference                    | 58 (98)                | 1 (2)               | Reference                      | Reference                     |
| Education level                | ≤ A-level                         | 179 (63)               | 105 (37)            | <b>0.56** (0.41 to 0.75)</b>   | <b>0.59* (0.42 to 0.84)</b>  | 227 (88)               | 31 (12)             | 0.91 (0.55 to 1.51)            | 1.27 (0.71 to 2.26)           |
|                                | Degree ≥                          | 248 (49)               | 261 (51)            | Reference                      | Reference                    | 267 (87)               | 40 (13)             | Reference                      | Reference                     |
| Marital status                 | Living alone                      | 49 (48)                | 54 (52)             | 1.34 (0.88 to 2.02)            | 1.30 (0.82 to 2.06)          | 75 (88)                | 10 (12)             | 0.91 (0.45 to 1.85)            | 0.92 (0.41 to 2.03)           |
|                                | Married/cohabiting                | 383 (55)               | 316 (45)            | Reference                      | Reference                    | 422 (87)               | 62 (13)             | Reference                      | Reference                     |
| Ethnicity                      | White                             | 355 (53)               | 316 (47)            | 1.23 (0.84 to 1.12)            | <b>1.66* (1.07 to 2.58)</b>  | 450 (87)               | 65 (13)             | 1.04 (0.42 to 2.53)            | 1.47 (0.53 to 4.13)           |
|                                | BAME                              | 72 (58)                | 52 (42)             | Reference                      | Reference                    | 43 (78)                | 12 (22)             | Reference                      | Reference                     |
| Child gender                   | Boy                               | 230 (51.5)             | 217 (48.5)          | 1.25 (0.94 to 1.65)            | 1.15 (0.85 to 1.56)          | 244 (87)               | 36 (13)             | 1.04 (0.63 to 1.70)            | 0.96 (0.56 to 1.66)           |
|                                | Girl                              | 202 (57)               | 153 (43)            | Reference                      | Reference                    | 253 (87.5)             | 36 (12.5)           | Reference                      | Reference                     |
| School year                    | Early Years                       | 77 (59)                | 53 (41)             | 0.74 (0.50 to 1.10)            | 0.79 (0.51 to 1.23)          | ***                    | ***                 | ***                            | ***                           |
|                                | Key Stage 1                       | 157 (54)               | 132 (46)            | 0.90 (0.66 to 1.22)            | 0.88 (0.63 to 1.24)          | 30 (86)                | 5 (14)              | 2.10 (0.57 to 7.81)            | 1.52 (0.37 to 6.30)           |
|                                | Key Stage 2                       | 198 (52)               | 185 (48)            | Reference                      | Reference                    | 120 (86)               | 20 (15)             | 2.10 (0.75 to 5.86)            | 1.45 (0.47 to 4.44)           |
|                                | Key Stage 3                       | ***                    | ***                 | ***                            | ***                          | 152 (87)               | 23 (13)             | 1.91 (0.69 to 5.24)            | 1.58 (0.55 to 4.55)           |
|                                | Key Stage 4                       | ***                    | ***                 | ***                            | ***                          | 132 (87)               | 19 (13)             | 1.81 (0.65 to 5.08)            | 1.44 (0.49 to 4.24)           |
|                                | Years 12 & 13                     | ***                    | ***                 | ***                            | ***                          | 63 (93)                | 5 (7)               | Reference                      | Reference                     |
| School type                    | Fee-paying                        | 35 (33)                | 71 (67)             | <b>2.68** (1.74 to 4.13)</b>   | <b>2.50** (1.56 to 4.00)</b> | 30 (77)                | 9 (23)              | <b>2.20* (1.00 to 4.85)</b>    | 2.04 (0.82 to 5.07)           |
|                                | State-funded                      | 395 (57)               | 299 (43)            | Reference                      | Reference                    | 462 (88)               | 63 (12)             | Reference                      | Reference                     |
| Child has SEN                  | Yes                               | 22 (31)                | 48 (69)             | <b>2.78** (1.64 to 4.70)</b>   | <b>2.30* (1.27 to 4.17)</b>  | 28 (61)                | 18 (39)             | <b>5.74** (2.97 to 11.08)</b>  | <b>7.92** (3.59 to 17.46)</b> |
|                                | No                                | 406 (56)               | 319 (44)            | Reference                      | Reference                    | 464 (90)               | 52 (10)             | Reference                      | Reference                     |
| Low child well-being           | Yes                               | 92 (42)                | 124 (57)            | <b>1.86** (1.36 to 2.55)</b>   | <b>1.47* (1.04 to 2.07)</b>  | 127 (82)               | 28 (18)             | <b>1.85* (1.11 to 3.10)</b>    | <b>1.78* (1.00 to 3.21)</b>   |

|                                         |     |            |            |                               |                               |            |           |                               |                               |
|-----------------------------------------|-----|------------|------------|-------------------------------|-------------------------------|------------|-----------|-------------------------------|-------------------------------|
|                                         | No  | 340 (58)   | 246 (42)   | Reference                     | Reference                     | 370 (89)   | 44 (11)   | Reference                     | Reference                     |
| Child vulnerable COVID-19               | Yes | 28 (39)    | 44 (61)    | <b>2.00* (1.21 to 3.28)</b>   | <b>1.76* (1.00 to 3.10)</b>   | 33 (82.5)  | 7 (17.5)  | 1.49 (0.63 to 3.50)           | 0.93 (0.33 to 2.63)           |
|                                         | No  | 401 (56)   | 316 (44)   | Reference                     | Reference                     | 455 (87.5) | 65 (12.5) | Reference                     | Reference                     |
| Household vulnerable COVID-19           | Yes | 115 (60)   | 78 (40)    | 0.78 (0.56 to 1.08)           | 0.74 (0.51 to 1.06)           | 134 (88)   | 18 (12)   | 0.90 (0.50 to 1.60)           | 0.56 (0.44 to 1.67)           |
|                                         | No  | 295 (53)   | 258 (47)   | Reference                     | Reference                     | 314 (87)   | 47 (13)   | Reference                     | Reference                     |
| Child COVID-19 symptoms                 | Yes | 15 (24)    | 47 (76)    | <b>5.05** (2.22 to 7.36)</b>  | <b>3.02* (1.49 to 6.15)</b>   | 11 (58)    | 8 (42)    | <b>5.52** (2.14 to 14.24)</b> | <b>5.25* (1.58 to 17.41)</b>  |
|                                         | No  | 417 (56)   | 323 (44)   | Reference                     | Reference                     | 486 (88)   | 64 (12)   | Reference                     | Reference                     |
| Household COVID-19 symptoms             | Yes | 9 (17)     | 43 (83)    | <b>6.18** (2.97 to 12.86)</b> | <b>6.04** (2.62 to 13.91)</b> | 13 (65)    | 7 (35)    | <b>4.00* (1.54 to 10.42)</b>  | <b>4.11* (1.26 to 13.44)</b>  |
|                                         | No  | 423 (56)   | 327 (43)   | Reference                     | Reference                     | 484 (88)   | 65 (12)   | Reference                     | Reference                     |
| Child has had or currently has COVID-19 | Yes | 36 (24)    | 112 (76)   | <b>4.78** (3.18 to 7.17)</b>  | <b>4.03** (2.57 to 6.30)</b>  | 40 (67)    | 20 (33)   | <b>4.40** (2.40 to 8.08)</b>  | <b>5.20** (2.48 to 10.93)</b> |
|                                         | No  | 396 (61)   | 258 (37)   | Reference                     | Reference                     | 457 (90)   | 52 (10)   | Reference                     | Reference                     |
| Someone over 70 years                   | Yes | 11 (26)    | 32 (74)    | <b>3.62** (1.80 to 7.30)</b>  | <b>3.19* (1.45 to 7.05)</b>   | 8 (57)     | 6 (43)    | <b>5.56* (1.87 to 16.52)</b>  | <b>3.49* (0.98 to 12.46)</b>  |
|                                         | No  | 421 (55.5) | 338 (44.5) | Reference                     | Reference                     | 489 (88)   | 66 (12)   | Reference                     | Reference                     |

\*  $p \leq .05$  and formatted bold

\*\*  $p \leq .001$  and formatted bold

\*\*\* data not applicable for the sample

† Adjusting for participant gender, age, region, household income, employment status, education level, marital status, participant ethnicity, and the child's gender, school year and school-type.

<sup>1</sup> Working includes students and volunteers

Decimal places have been used for rounding errors

## DISCUSSION

Most children eligible to attend school did not attend one week after schools in England began to re-open to more children.[25] Worryingly, we observed patterns that seemed likely to entrench existing educational inequalities. Children from households where parents have lower education achievements, BAME households and households in the North of England, and state-funded being least likely to attend school.

Our results suggest that several broad areas determined attendance at school. First, risk perceptions were crucial. The response “it is too risky” featured highly in parental reasons for not sending children to school. Secondly, children were also more likely to attend school when parents thought their child had had COVID-19 which could indicate the belief their child is immune to further infection.[26] Unexpectedly, children were more likely to attend school when they had a health condition that made them vulnerable to COVID-19 and when a person over 70 years was living in the household. We speculate that this may be because these circumstances affect the parent’s ability to look after the child at home.

Poorer perceived child well-being was associated with them being more likely to attend school. This finding may reflect parental desire to improve their child’s well-being which may have been impacted by the school closure.[27] This was also apparent in reasons parents gave for sending their child to school. As expected,[14] concerns about education also featured highly as a reason for attendance, while perceptions that schools could not provide good quality education or that some lessons were not as important were cited as reasons for absence or partial attendance.

Despite most children of key workers not attending school, needing to work was the most reported reason for school attendance and the school not opening or asking the child not to attend were the most commonly reported reasons for the child not being in school. This suggests that work commitments were the main driver for this group.

One notable finding was that children who had symptoms of COVID-19 in the past seven days, or whose household members had these symptoms in the past 14 days were significantly more likely to have gone to school. We do not know if the child attended school whilst having symptoms or when symptoms were present in the household (against self-isolation guidance)[28]. However, given that school closure is specifically designed to reduce the transmission of respiratory infections in general, it is also possible that this reflects the re-emergence of transmission of upper respiratory tract infections, or COVID-19 specifically, within the school environment.[29] It may also reflect increased anxiety or awareness among parents around COVID-19 symptoms, resulting in higher symptom detection and reporting.

## LIMITATIONS

Several limitations should be borne in mind for this study. First the cross-sectional nature of this study limits our ability to draw causal findings. Second, the RCADS subscale was used to indicate low well-being but is currently not validated for children under eight years.[30] Third, online polls can be unrepresentative, and lead to response, and self-reporting bias.[31] However, in line with the reasoning relating to the use of non-probability samples in social sciences, [32] we assume that the associations within our data do generalise to the wider population. Fourth, we ran many analyses raising the possibility of Type 1 errors. While we have provided Bonferroni corrections in the tables for readers who wish to correct this, this correction in turn may be overly conservative.

## CONCLUSION

Our findings support previous research by suggesting that during an infectious disease outbreak, parents' decision to send their child to school was impacted by the risk of disease (COVID-19), child's education and well-being. Furthermore, without reassuring parents in these three areas and encouraging them to send their children to school health inequalities are likely to be increased.

## Contributors

All authors contributed to the conceptualisation of the study and approved the final draft. LW designed the survey, analysed the data and drafted the manuscript. LES designed the survey, analysed the data and edited the manuscript. RKW edited the manuscript. RA designed the survey and edited the manuscript. AR designed the survey and edited the manuscript. SW edited the manuscript. GJR designed the survey, analysed the data and edited the manuscript.

## Declarations of interests

We declare no competing interests.

## Acknowledgments

This study was funded by the Economic and Social Research Council and the National Institute for Health Research Health Protection Research Unit (NIHR HPRU) [grant number NIHR200890] in Emergency Preparedness and Response, a partnership between Public Health England, King's College London and the University of East Anglia. The views expressed are those of the authors and not necessarily those of the NIHR, Public Health England or the Department of Health and Social Care.

## Role of the funding source

1  
2  
3 The funders had no role in study design, data collection, data analysis, data  
4 interpretation, or writing of the manuscript. The corresponding author had full access  
5 to all the data and had final responsibility for the decision to submit for publication.  
6  
7  
8  
9  
10  
11  
12  
13  
14  
15  
16  
17  
18  
19  
20  
21  
22  
23  
24  
25  
26  
27  
28  
29  
30  
31  
32  
33  
34  
35  
36  
37  
38  
39  
40  
41  
42  
43  
44  
45  
46  
47  
48  
49  
50  
51  
52  
53  
54  
55  
56  
57  
58  
59  
60

Confidential: For Review Only

## REFERENCES

- 1 Prime Minister B Johnson. PM statement on coronavirus: 18 March 2020. Available at: [https://www.gov.uk/government/speeches/pm-statement-on-coronavirus-18-march-2020?utm\\_source=407969fc-4de1-41c8-9571-f6b6ad35efae&utm\\_medium=email&utm\\_campaign=govuk-notifications&utm\\_content=immediate](https://www.gov.uk/government/speeches/pm-statement-on-coronavirus-18-march-2020?utm_source=407969fc-4de1-41c8-9571-f6b6ad35efae&utm_medium=email&utm_campaign=govuk-notifications&utm_content=immediate) Accessed 11 June 2020.
- 2 Government. H. Children of critical workers and vulnerable children who can access schools or educational settings. Available at: <https://www.gov.uk/government/publications/coronavirus-covid-19-maintaining-educational-provision/guidance-for-schools-colleges-and-local-authorities-on-maintaining-educational-provision> Accessed 16 March 2021.
- 3 Prime Minister B Johnson. PM confirms schools, colleges and nurseries on track to begin phased reopening. Available at: <https://www.gov.uk/government/news/pm-confirms-schools-colleges-and-nurseries-on-track-to-begin-phased-reopening> Accessed 11 June 2020.
- 4 HM Government. School Attendance. Available at: <https://www.gov.uk/government/publications/school-attendance> Accessed 8 July 2020.
- 5 Viner RM, Russell SJ, Croker H, et al. School closure and management practices during coronavirus outbreaks including COVID-19: a rapid systematic review. *The Lancet Child & Adolescent Health*. 2020;4(5):397-404 DOI: 10.1016/s2352-4642(20)30095-x
- 6 Keogh-Brown MR, Jensen HT, Edmunds WJ, Smith RD. The impact of Covid-19, associated behaviours and policies on the UK economy: A computable general equilibrium model. *SSM - Population Health*. 2020;[in press]:100651 DOI: 10.1016/j.ssmph.2020.100651
- 7 Boast A, Munro A, Goldstein H. An evidence summary of Paediatric COVID-19 literature. Available at: <https://dontforgetthebubbles.com/evidence-summary-paediatric-covid-19-literature/> Accessed 8 July 2020.
- 8 Zhu Y, Bloxham C, K H, et al. Children are unlikely to have been the primary source of household SARS-CoV-2 infections. 2020; DOI: 10.1101/2020.03.26.20044826v1
- 9 World Health Organization. Report of the WHO-China joint mission on coronavirus disease 2019 (COVID-19). Available at: [https://www.who.int/publications/i/item/report-of-the-who-china-joint-mission-on-coronavirus-disease-2019-\(covid-19\)](https://www.who.int/publications/i/item/report-of-the-who-china-joint-mission-on-coronavirus-disease-2019-(covid-19)) Accessed 8 July 2020.
- 10 Heavey L, Casey G, Kelly C, et al. No evidence of secondary transmission of COVID-19 from children attending school in Ireland, 2020. *Eurosurveillance*. 2020;25(21) DOI: 10.2807/1560-7917.es.2020.25.21.2000903
- 11 Otte Im Kampe E, Leheld A-S, Buda S, et al. Surveillance of COVID-19 school outbreaks, Germany, March to August 2020. *Eurosurveillance*. 2020;25(38) DOI: 10.2807/1560-7917.es.2020.25.38.2001645
- 12 England. PH. SARS-CoV-2 infection and transmission in educational settings. Available at: <https://www.gov.uk/government/publications/sars-cov-2-infection-and-transmission-in-educational-settings> Accessed 22 October 2020.
- 13 Royal College of Paediatrics and Child Health. COVID\_19 - talking to children and families about returning to school: guiding principles. Available at: <https://www.rcpch.ac.uk/resources/covid-19-talking-children-families-about-returning-school-guiding-principles> Accessed 9 July 2020.

- 1  
2  
3 14 Brooks SK, Smith LE, Webster RK, et al. The impact of unplanned school closure  
4 on children's social contact: rapid evidence review. *Euro Surveill.* 2020;25(13) DOI:  
5 10.2807/1560-7917.ES.2020.25.13.2000188  
6  
7 15 Basurto-Dávila R, Garza R, Meltzer MI, et al. Household economic impact and  
8 attitudes toward school closures in two cities in Argentina during the 2009 influenza  
9 A (H1N1) pandemic. *Influenza and Other Respiratory Viruses.* 2013;7(6):1308-15  
10 DOI: 10.1111/irv.12054  
11  
12 16 Effler PV, Carcione D, Giele C, et al. Household responses to pandemic (H1N1)  
13 2009-related school closures, Perth, Western Australia. *Emerg Infect Dis.*  
14 2010;16(2):205-11 DOI: 10.3201/eid1602.091372  
15  
16 17 van Gemert C, McBryde ES, Bergeri I, et al. Description of social contacts among  
17 student cases of pandemic influenza during the containment phase, Melbourne,  
18 Australia, 2009. *Western Pac Surveill Response J.* 2018;9(5 Suppl 1):27-34 DOI:  
19 10.5365/wpsar.2018.9.5.003  
20  
21 18 Lee J. Mental health effects of school closures during COVID-19. *The Lancet*  
22 *Child & Adolescent Health.* 2020;4(6):421 DOI: 10.1016/s2352-4642(20)30109-7  
23  
24 19 Research. B. BMG About Us. Available at:  
25 <https://www.bmgresearch.co.uk/bmg/about-us/> Accessed 16 March 2021.  
26  
27 20 Smith LE, Woodland L, Amlôt R, et al. A cross-sectional survey of parental  
28 perceptions of COVID-19 related hygiene measures within schools and adherence to  
29 social distancing in journeys to and from school. *BMJ Paediatrics Open.* 2020;4(1)  
30 DOI: 10.1136/bmjpo-2020-000825  
31  
32 21 HM Government. Schools, pupils and their characteristics: Academic Year  
33 2019/20. Available at: [https://explore-education-statistics.service.gov.uk/find-](https://explore-education-statistics.service.gov.uk/find-statistics/school-pupils-and-their-characteristics)  
34 [statistics/school-pupils-and-their-characteristics](https://explore-education-statistics.service.gov.uk/find-statistics/school-pupils-and-their-characteristics) Accessed 25 June 2020.  
35  
36 22 Chorpita BF, Yim L, Moffitt C, et al. Assessment of symptoms of DSM-IV anxiety  
37 and depression in children: a revised child anxiety and depression scale. *Behaviour*  
38 *Research and Therapy.* 2000;38(8):835-55 DOI: 10.1016/s0005-7967(99)00130-8  
39  
40 23 Chorpita BF. Child FIRST - Focus on innovation and redesign in systems and  
41 treatment. Available at: <https://www.childfirst.ucla.edu/resources/> Accessed 6 July  
42 2020.  
43  
44 24 IBM Corp.2019. IBM SPSS Statistics for Windows, 26.0 Armonk, NY.  
45  
46 25 HM Government. attendance in education and early years settings during the  
47 coronavirus (COVID-19) outbreak. Available at:  
48 [https://www.gov.uk/government/publications/coronavirus-covid-19-attendance-in-](https://www.gov.uk/government/publications/coronavirus-covid-19-attendance-in-education-and-early-years-settings?utm_source=efcd291f-83ee-4d73-860a-7e823b3c0017&utm_medium=email&utm_campaign=govuk-notifications&utm_content=immediate)  
49 [education-and-early-years-settings?utm\\_source=efcd291f-83ee-4d73-860a-](https://www.gov.uk/government/publications/coronavirus-covid-19-attendance-in-education-and-early-years-settings?utm_source=efcd291f-83ee-4d73-860a-7e823b3c0017&utm_medium=email&utm_campaign=govuk-notifications&utm_content=immediate)  
50 [7e823b3c0017&utm\\_medium=email&utm\\_campaign=govuk-](https://www.gov.uk/government/publications/coronavirus-covid-19-attendance-in-education-and-early-years-settings?utm_source=efcd291f-83ee-4d73-860a-7e823b3c0017&utm_medium=email&utm_campaign=govuk-notifications&utm_content=immediate)  
51 [notifications&utm\\_content=immediate](https://www.gov.uk/government/publications/coronavirus-covid-19-attendance-in-education-and-early-years-settings?utm_source=efcd291f-83ee-4d73-860a-7e823b3c0017&utm_medium=email&utm_campaign=govuk-notifications&utm_content=immediate) Accessed 9 June 2020.  
52  
53 26 Smith LE, Mottershaw AL, Egan M, et al. The impact of believing you have had  
54 COVID-19 on self-reported behaviour: Cross-sectional survey. *PLOS ONE.*  
55 2020;15(11):e0240399 DOI: 10.1371/journal.pone.0240399  
56  
57 27 Idoiaga M, Berasategi S, Dosil S, Eiguren M. Struggling to breathe: a qualitative  
58 study of children's wellbeing during lockdown in Spain. *Psychology & Health.* 2020:1-  
59 16 DOI: 10.1080/08870446.2020.1804570  
60  
61 28 HM Government. Protective measures for out-of-school settings during the  
62 coronavirus (COVID-19) outbreak. Available at:  
63 [https://www.gov.uk/government/publications/protective-measures-for-holiday-or-](https://www.gov.uk/government/publications/protective-measures-for-holiday-or-after-school-clubs-and-other-out-of-school-settings-for-children-during-the-coronavirus-covid-19-outbreak/protective-measures-for-out-of-school-settings-during-the-coronavirus-covid-19-outbreak)  
64 [after-school-clubs-and-other-out-of-school-settings-for-children-during-the-](https://www.gov.uk/government/publications/protective-measures-for-holiday-or-after-school-clubs-and-other-out-of-school-settings-for-children-during-the-coronavirus-covid-19-outbreak/protective-measures-for-out-of-school-settings-during-the-coronavirus-covid-19-outbreak)  
65 [coronavirus-covid-19-outbreak/protective-measures-for-out-of-school-settings-](https://www.gov.uk/government/publications/protective-measures-for-holiday-or-after-school-clubs-and-other-out-of-school-settings-for-children-during-the-coronavirus-covid-19-outbreak/protective-measures-for-out-of-school-settings-during-the-coronavirus-covid-19-outbreak)  
66 [during-the-coronavirus-covid-19-outbreak](https://www.gov.uk/government/publications/protective-measures-for-holiday-or-after-school-clubs-and-other-out-of-school-settings-for-children-during-the-coronavirus-covid-19-outbreak/protective-measures-for-out-of-school-settings-during-the-coronavirus-covid-19-outbreak) Accessed 8 July 2020.

- 1  
2  
3 29 Panovska-Griffiths J, Kerr CC, Stuart RM, et al. Determining the optimal strategy  
4 for reopening schools, the impact of test and trace interventions, and the risk of  
5 occurrence of a second COVID-19 epidemic wave in the UK: a modelling study. *The*  
6 *Lancet Child & Adolescent Health*. 2020; DOI: 10.1016/s2352-4642(20)30250-9  
7  
8 30 Ebesutani C, Chorpita BF, Higa-McMillan CK, et al. A Psychometric Analysis of  
9 the Revised Child Anxiety and Depression Scales—Parent Version in a School  
10 Sample. *Journal of Abnormal Child Psychology*. 2011;39(2):173-85 DOI:  
11 10.1007/s10802-010-9460-8  
12  
13 31 Epstein WM. Response bias in opinion polls and American social welfare. *The*  
14 *Social Science Journal*. 2006;43(1):99-110 DOI: 10.1016/j.soscij.2005.12.010  
15  
16 32 Kohler U. Possible Uses of Nonprobability Sampling for the Social Sciences.  
17 *Survey Methods: Insights from the Field*. Available at:  
18 <https://surveyinsights.org/?p=10981> Accessed 29 July 2020.  
19  
20  
21  
22  
23  
24  
25  
26  
27  
28  
29  
30  
31  
32  
33  
34  
35  
36  
37  
38  
39  
40  
41  
42  
43  
44  
45  
46  
47  
48  
49  
50  
51  
52  
53  
54  
55  
56  
57  
58  
59  
60



## SUPPLEMENTARY MATERIAL

Table 1: Table of frequencies to show reasons children did not attend school.

| Reason                                                                                                           | Children in School Years (n=432, %) | Children of Key Workers (n=497, %) |
|------------------------------------------------------------------------------------------------------------------|-------------------------------------|------------------------------------|
| I think it is too risky for my child to attend school at the moment                                              | 223 (52%)                           | 109 (22%)                          |
| The school is not open                                                                                           | 140 (32%)                           | 259 (52%)                          |
| I have another child who can't go to school                                                                      | 67 (15.5%)                          | 24 (5%)                            |
| Being at school will be stressful for my child                                                                   | 59 (14%)                            | 23 (5%)                            |
| I think they will get a better education at home than at school at the moment                                    | 57 (13%)                            | 25 (5%)                            |
| The school has asked my child not to attend                                                                      | 51 (12%)                            | 117 (23.5%)                        |
| Someone in my household is clinically vulnerable to coronavirus                                                  | 45 (10%)                            | 24 (5%)                            |
| My child doesn't want to go                                                                                      | 44 (10%)                            | 29 (6%)                            |
| There's no point, schools will shut again soon anyway                                                            | 37 (9%)                             | 13 (3%)                            |
| My child's friends will not be at school                                                                         | 28 (6.5%)                           | 19 (4%)                            |
| Other reason                                                                                                     | 28 (6.5%)                           | 65 (13%)                           |
| I think friends, family or other parents will judge me if I send my child to school                              | 12 (3%)                             | 4 (1%)                             |
| I can't arrange transport to get them to school                                                                  | 6 (1%)                              | 10 (2%)                            |
| Someone else at the school developed coronavirus symptoms (cough or fever, or change in sense of taste or smell) | 6 (1%)                              | 4 (1%)                             |
| My child developed symptoms of a different illness                                                               | 3 (1%)                              | 1 (0%)                             |
| They have developed coronavirus symptoms (cough or fever, or change in sense of taste or smell)                  | 2 (0.5%)                            | 2 (0%)                             |
| Someone else in the family developed coronavirus symptoms (cough or fever, or change in sense of taste or smell) | 0 (0%)                              | 3 (1%)                             |

Table 2: Table of frequencies to show reasons children attended school.

| Reason                                                                                    | Children in School Years (n=370, %) | Children of Key Workers (n=72, %) |
|-------------------------------------------------------------------------------------------|-------------------------------------|-----------------------------------|
| My child's education will benefit from being at school                                    | 208 (56%)                           | 30 (42%)                          |
| My child wants to go to school                                                            | 200 (54%)                           | 35 (49%)                          |
| My child will benefit from seeing their friends                                           | 187 (50.5%)                         | 27 (37.5%)                        |
| I need to work                                                                            | 120 (32%)                           | 40 (56%)                          |
| I don't believe my child will be at risk at school                                        | 96 (26%)                            | 17 (24%)                          |
| Having my child at home is a strain                                                       | 57 (15%)                            | 10 (14%)                          |
| It is compulsory for my child to attend                                                   | 50 (13.5%)                          | 9 (12.5%)                         |
| It reduces costs at home                                                                  | 48 (13%)                            | 7 (10%)                           |
| I think friends, family or other parents will judge me if I don't send my child to school | 43 (12%)                            | 11 (15%)                          |
| I have non-work commitments I need to meet                                                | 21 (6%)                             | 4 (6%)                            |
| Other reason                                                                              | 9 (2%)                              | 3 (4%)                            |

Table 3: Table of frequencies to show reasons children attended school part-time (less than five days).

| Reason                                             | Children in School Years (n=204, %) | Children of Key Workers (n=39, %) |
|----------------------------------------------------|-------------------------------------|-----------------------------------|
| The school only offers for them to be in part-time | 80 (39%)                            | 16 (41%)                          |
| It is less risky for them to be in part-time       | 40 (20%)                            | 7 (18%)                           |

|    |                                                                                                                  |          |           |
|----|------------------------------------------------------------------------------------------------------------------|----------|-----------|
| 1  |                                                                                                                  |          |           |
| 2  |                                                                                                                  |          |           |
| 3  | I am only sending them in on days where the lessons are important                                                | 28 (14%) | 8 (20.5%) |
| 4  | Other reason                                                                                                     | 27 (13%) | 3 (8%)    |
| 5  |                                                                                                                  |          |           |
| 6  | I am using it as childcare and I only need them in part time                                                     | 24 (12%) | 6 (15%)   |
| 7  | I am only sending them in on days when I can arrange transport                                                   | 23 (11%) | 4 (10%)   |
| 8  | Someone else at the school developed coronavirus symptoms (cough or fever, or change in sense of taste or smell) | 14 (7%)  | 1 (3%)    |
| 9  | I started sending them in, but have now changed my mind                                                          | 13 (6%)  | 2 (5%)    |
| 10 |                                                                                                                  |          |           |
| 11 | They have developed coronavirus symptoms (cough or fever, or change in sense of taste or smell)                  | 13 (6%)  | 1 (3%)    |
| 12 | Someone else in the family developed coronavirus symptoms (cough or fever, or change in sense of taste or smell) | 12 (6%)  | 0 (0%)    |
| 13 |                                                                                                                  |          |           |
| 14 | I am only sending them in on days when their friends are in                                                      | 11 (5%)  | 6 (15%)   |
| 15 | My child developed symptoms of a different illness                                                               | 9 (4%)   | 0 (0%)    |
| 16 |                                                                                                                  |          |           |
| 17 | They only live with me part time                                                                                 | 6 (3%)   | 1 (3%)    |
| 18 |                                                                                                                  |          |           |
| 19 |                                                                                                                  |          |           |
| 20 |                                                                                                                  |          |           |
| 21 |                                                                                                                  |          |           |
| 22 |                                                                                                                  |          |           |
| 23 |                                                                                                                  |          |           |
| 24 |                                                                                                                  |          |           |
| 25 |                                                                                                                  |          |           |
| 26 |                                                                                                                  |          |           |
| 27 |                                                                                                                  |          |           |
| 28 |                                                                                                                  |          |           |
| 29 |                                                                                                                  |          |           |
| 30 |                                                                                                                  |          |           |
| 31 |                                                                                                                  |          |           |
| 32 |                                                                                                                  |          |           |
| 33 |                                                                                                                  |          |           |
| 34 |                                                                                                                  |          |           |
| 35 |                                                                                                                  |          |           |
| 36 |                                                                                                                  |          |           |
| 37 |                                                                                                                  |          |           |
| 38 |                                                                                                                  |          |           |
| 39 |                                                                                                                  |          |           |
| 40 |                                                                                                                  |          |           |
| 41 |                                                                                                                  |          |           |
| 42 |                                                                                                                  |          |           |
| 43 |                                                                                                                  |          |           |
| 44 |                                                                                                                  |          |           |
| 45 |                                                                                                                  |          |           |
| 46 |                                                                                                                  |          |           |
| 47 |                                                                                                                  |          |           |
| 48 |                                                                                                                  |          |           |
| 49 |                                                                                                                  |          |           |
| 50 |                                                                                                                  |          |           |
| 51 |                                                                                                                  |          |           |
| 52 |                                                                                                                  |          |           |
| 53 |                                                                                                                  |          |           |
| 54 |                                                                                                                  |          |           |
| 55 |                                                                                                                  |          |           |
| 56 |                                                                                                                  |          |           |
| 57 |                                                                                                                  |          |           |
| 58 |                                                                                                                  |          |           |
| 59 |                                                                                                                  |          |           |
| 60 |                                                                                                                  |          |           |

**Full Survey Material**

D1. Please type your age on your last birthday: [number]

**Screenout if D1 = <18**

Q1. Which country do you live in? [single code]

- a. England
- b. Scotland
- c. Wales
- d. Northern Ireland
- e. Outside of the UK

**Screenout if Q1 = b-e**

Q2. Which region do you live in? [single code]

- a. East Midlands
- b. East of England
- c. London
- d. North East
- e. North West
- f. South East
- g. South West
- h. West Midlands
- i. Yorkshire and the Humber

Q3. Are you the parent or guardian of a child who usually attends school (that is, before the coronavirus outbreak occurred) and who lives with you? [single code]

- a. Yes
- b. No

**Screenout if Q3 = b**

Q4. Which of the following age groups do your children who live with you fall into? Please tick any that apply. [multi code]

- a. 0-3
- b. 4-11
- c. 12-18
- d. None of the above [exclusive]

**Screenout if b OR c not selected**

Q5. The Government has categorised some people as “critical workers” or “key workers.” For example, this includes people working in health and social care, education, key public services, transport, food distribution and other jobs. As far as you know, are you, or a spouse/partner, a “critical” or “key” worker? Please tick any that apply. [multi code]

- a. Yes, me
- b. Yes, spouse/partner
- c. No [exclusive]
- d. Don't know [exclusive]

IF Q4 = b

Q6. You stated that you have at least one child aged 4-11 who lives with you. Are any of your children who live with you in the following school years? Please tick any that apply. [multi code]

- a. Reception
- b. Year 1
- c. Year 6

- 1  
2  
3 d. I have no children in the school years listed above [exclusive]

4  
5 IF 2 or more options are selected at Q6

6 Q7. Thinking only about your children in Reception, Year 1 or Year 6, who live with you, which child had the  
7 most recent birthday? If the most recent birthday was shared by more than one child (e.g. twins, or children born  
8 on the same day in different years), please answer the following questions thinking about one of these children  
9 only. [single code]

- 10  
11 a. My child in Reception  
12 b. My child in Year 1  
13 c. My child in Year 6

14 ONLY SHOW OPTIONS SELECTED AT Q6

15  
16 IF Q6 = a-c

17 Q8. Can you please tell us how old that child is? [single code]

- 18  
19 a. 4  
20 b. 5  
21 c. 6  
22 d. 7  
23 e. 8  
24 f. 9  
25 g. 10  
26 h. 11

27  
28 IF Q6 = a-c

29 Q9. Can you please tell us if that child is a: [single code]

- 30  
31 a. Boy  
32 b. Girl

33  
34 IF Q6 = a-c

35 Q10. Can you please tell us the type of school that child usually attends? [single code]

- 36  
37 a. Fee-paying  
38 b. State-funded school  
39 c. Don't know

40  
41 IF Q6 = a-c

42 Q11A. Thinking about that child, have they attended school at all in the past 7 days? [single code]

- 43  
44 a. Yes, on 5 days  
45 b. Yes, on 1 to 4 days  
46 c. No  
47 d. Don't know

48  
49 IF Q11A = a/b

50 Q12A. You said that your child has attended school on at least one day in the past week. For which reasons did  
51 you send your child to school? Please tick any that apply [multi code]:

52 RANDOMISE ORDER OF STATEMENTS, anchor other to bottom

- 53  
54 a) It is compulsory for my child to attend  
55 b) I need to work  
56 c) I have non-work commitments I need to meet  
57 d) My child's education will benefit from being at school  
58 e) My child will benefit from seeing their friends  
59 f) Having my child at home is a strain  
60 g) I don't believe my child will be at risk at school

- 1  
2  
3 h) My child wants to go to school  
4 i) I think friends, family or other parents will judge me if I don't send my child to school  
5 j) It reduces costs at home  
6 k) Other reason [write in]  
7

8 IF Q11A = b

9 Q13A. You said that your child has not attended school every day in the past week. For which reasons are they  
10 attending only part-time? Please tick any that apply [multi code]:  
11

12 RANDOMISE ORDER OF STATEMENTS, anchor other to bottom

- 13 a) I am using it as childcare and I only need them in part time  
14 b) It is less risky for them to be in part-time  
15 c) The school only offers for them to be in part-time  
16 d) I am only sending them in on days where the lessons are important  
17 e) I am only sending them in on days when their friends are in  
18 f) I am only sending them in on days when I can arrange transport  
19 g) They only live with me part time  
20 h) I started sending them in, but have now changed my mind  
21 i) They have developed coronavirus symptoms (cough or fever, or change in sense of taste or smell)  
22 j) My child developed symptoms of a different illness  
23 k) Someone else in the family developed coronavirus symptoms (cough or fever, or change in sense of  
24 taste or smell)  
25 l) Someone else at the school developed coronavirus symptoms (cough or fever, or change in sense of  
26 taste or smell)  
27 m) Other reason [write in]  
28

29 IF Q11A = c

30 Q14A. You said that your child has not attended school in the past week. For which reasons did you not send  
31 your child to school? Please tick any that apply [multi code]:  
32

33 RANDOMISE ORDER OF STATEMENTS, anchor other to bottom

- 34 a) Someone in my household is clinically vulnerable to coronavirus  
35 b) I think it is too risky for my child to attend school at the moment  
36 c) The school is not open  
37 d) The school has asked my child not to attend  
38 e) My child doesn't want to go  
39 f) I think friends, family or other parents will judge me if I send my child to school  
40 g) I think they will get a better education at home than at school at the moment  
41 h) Being at school will be stressful for my child  
42 i) My child's friends will not be at school  
43 j) I have another child who can't go to school  
44 k) I can't arrange transport to get them to school  
45 l) There's no point, schools will shut again soon anyway  
46 m) They have developed coronavirus symptoms (cough or fever, or change in sense of taste or smell)  
47 n) My child developed symptoms of a different illness  
48 o) Someone else in the family developed coronavirus symptoms (cough or fever, or change in sense of  
49 taste or smell)  
50 p) Someone else at the school developed coronavirus symptoms (cough or fever, or change in sense of  
51 taste or smell)  
52 q) Other reason [write in]  
53

54 IF Q11A = a/b

55 Q15A. In this question we are interested in things that happened on the most recent day that your child went to  
56 school. Please remember that this survey is anonymous – please be honest in your answers. Please tick any that  
57 apply. [multi code]  
58

59 RANDOMISE ORDER OF STATEMENTS, anchor none of these to bottom  
60

- 1  
2  
3 a) Either on the way to or from school, or at the school gates, I had physical contact with someone  
4 that I don't live with  
5 b) Either on the way to or from school, or at the school gates, I was within 1 metre of someone that I  
6 don't live with for 1 minute or longer  
7 c) Either on the way to or from school, or at the school gates, I was between 1 and 2 metres of  
8 someone that I don't live with for 15 minutes or longer  
9 d) My child used public transport to get to or from school.  
10 e) My child shared a lift in a car with another family to get to or from school.  
11 f) I gave a lift in a car to a child from another family to get them to or from school.  
12 g) My child washed their hands as soon as they got home from school.  
13 h) My child had a shower or bath as soon as they got home from school.  
14 i) I washed my child's clothes after they got home from school.  
15 j) None of these [exclusive]

16 IF Q11A = a/b

17  
18 Q16A. Thinking about the facilities or procedures at your child's school. Which of the following, if any, are  
19 actually happening as far as you are aware?

20 Please tick all that apply [multi code]

21  
22 RANDOMISE ORDER OF STATEMENTS, anchor none of these to bottom

- 23  
24 a) There are hand washing facilities or hand gel dispensers at the entrance to the school that are working  
25 b) There are hand washing facilities or hand gel dispensers at the entrance to the classrooms that are  
26 working  
27 c) Children's hand washing or hand gel use is being monitored at school  
28 d) My child's class sizes is now 15 or fewer  
29 e) Children need to take in their own food and snacks  
30 f) Children are having their temperature checked on the way in  
31 g) The school has used markings or barriers to help children keep their distance from each other  
32 h) None of these are happening at my child's school [exclusive]

33 Q17. For the next series of questions, we would like you to think about one of your children who usually goes to  
34 school (that is, before the coronavirus outbreak occurred). If you have more than one child who usually went to  
35 school, then please answer about your child with the most recent birthday. If the most recent birthday was  
36 shared by more than one child (e.g. twins, or children born on the same day in different years), please answer  
37 the following questions thinking about one of these children only.  
38

39 Firstly, can you tell us the first name of your child. This is just so we can refer to them throughout the survey.  
40 You can give a fake name if you would prefer. [open]

41 \_\_\_\_\_  
42

43 Q18. How old is [CHILD]? [single code]

- 44  
45 a. 4  
46 b. 5  
47 c. 6  
48 d. 7  
49 e. 8  
50 f. 9  
51 g. 10  
52 h. 11  
53 i. 12  
54 j. 13  
55 k. 14  
56 l. 15  
57 m. 16  
58 n. 17  
59 o. 18  
60

1  
2  
3 Q19. What year is [CHILD] in at school [single code]  
4

- 5 a. Reception  
6 b. Year 1  
7 c. Year 2  
8 d. Year 3  
9 e. Year 4  
10 f. Year 5  
11 g. Year 6  
12 h. Year 7  
13 i. Year 8  
14 j. Year 9  
15 k. Year 10  
16 l. Year 11  
17 m. Year 12  
18 n. Year 13

19 Q20. Is [CHILD] a: [single code]

- 20 a. Boy  
21 b. Girl  
22

23 Q21. What type of school does [CHILD] normally attend? [single code]

- 24 a. Fee-paying  
25 b. State-funded school  
26 c. Don't know  
27

28 If Q5 = a/b AND [Q4 ≠ b or Q6 = d]

29 Q11B. Has [CHILD] attended school at all in the past 7 days? [single code]

- 30 a. Yes, on 5 days  
31 b. Yes, on 1 to 4 days  
32 c. No  
33 d. Don't know  
34

35 IF Q11B = a/b

36 Q12B. You said that [CHILD] has attended school on at least one day in the past week. For which reasons did  
37 you send [CHILD] to school? Please tick any that apply [multi code]:  
38

39 RANDOMISE ORDER OF STATEMENTS, anchor other to bottom  
40

- 41 a) It is compulsory for my child to attend  
42 b) I need to work  
43 c) I have non-work commitments I need to meet  
44 d) My child's education will benefit from being at school  
45 e) My child will benefit from seeing their friends  
46 f) Having my child at home is a strain  
47 g) I don't believe my child will be at risk at school  
48 h) My child wants to go to school  
49 i) I think friends, family or other parents will judge me if I don't send my child to school  
50 j) It reduces costs at home  
51 k) Other reason [write in]  
52

53 IF Q11B = b

54 Q13B. You said that [CHILD] has not attended school every day in the past week. For which reasons is  
55 [CHILD] attending only part-time? Please tick any that apply [multi code]:  
56

57 RANDOMISE ORDER OF STATEMENTS, anchor other to bottom  
58

- 59 a) I am using it as childcare and I only need them in part time  
60 b) It is less risky for them to be in part-time

- 1  
2  
3 c) The school only offers for them to be in part-time  
4 d) I am only sending them in on days where the lessons are important  
5 e) I am only sending them in on days when their friends are in  
6 f) I am only sending them in on days when I can arrange transport  
7 g) They only live with me part time  
8 h) I started sending them in, but have now changed my mind  
9 i) They have developed coronavirus symptoms (cough or fever, or change in sense of taste or smell)  
10 j) My child developed symptoms of a different illness  
11 k) Someone else in the family developed coronavirus symptoms (cough or fever, or change in sense of  
12 taste or smell)  
13 l) Someone else at the school developed coronavirus symptoms (cough or fever, or change in sense of  
14 taste or smell)  
15 m) Other reason [write in]

16 IF Q11B = c

17  
18 Q14B. You said that [CHILD] has not attended school in the past week. For which reasons did you not send  
19 [CHILD] to school? Please tick any that apply [multi code]:

20  
21 RANDOMISE ORDER OF STATEMENTS, anchor other to bottom

- 22 a) Someone in my household is clinically vulnerable to coronavirus  
23 b) I think it is too risky for my child to attend school at the moment  
24 c) The school is not open  
25 d) The school has asked my child not to attend  
26 e) My child doesn't want to go  
27 f) I think friends, family or other parents will judge me if I send my child to school  
28 g) I think they will get a better education at home than at school at the moment  
29 h) Being at school will be stressful for my child  
30 i) My child's friends will not be at school  
31 j) I have another child who can't go to school  
32 k) I can't arrange transport to get them to school  
33 l) There's no point, schools will shut again soon anyway  
34 m) They have developed coronavirus symptoms (cough or fever, or change in sense of taste or smell)  
35 n) My child developed symptoms of a different illness  
36 o) Someone else in the family developed coronavirus symptoms (cough or fever, or change in sense of  
37 taste or smell)  
38 p) Someone else at the school developed coronavirus symptoms (cough or fever, or change in sense of  
39 taste or smell)  
40 q) Other reason [write in]

41 IF Q11B = a/b

42  
43 Q15B. In this question we are interested in things that happened on the most recent day that [CHILD] went to  
44 school. Please remember that this survey is anonymous – please be honest in your answers. Please tick any that  
45 apply. [multi code]

46  
47 RANDOMISE ORDER OF STATEMENTS, anchor none of these to bottom

- 48 a) Either on the way to or from school, or at the school gates, I had physical contact with someone  
49 that I don't live with  
50 b) Either on the way to or from school, or at the school gates, I was within 1 metre of someone that I  
51 don't live with for 1 minute or longer  
52 c) Either on the way to or from school, or at the school gates, I was between 1 and 2 metres of  
53 someone that I don't live with for 15 minutes or longer  
54 d) My child used public transport to get to or from school.  
55 e) My child shared a lift in a car with another family to get to or from school.  
56 f) I gave a lift in a car to a child from another family to get them to or from school.  
57 g) My child washed their hands as soon as they got home from school.  
58 h) My child had a shower or bath as soon as they got home from school.  
59 i) I washed my child's clothes after they got home from school.  
60 j) None of these [exclusive]



1  
2  
3 IF Q11B = a/b  
4

5 Q16B. Thinking about the facilities or procedures at [CHILD]'s school. Which of the following, if any, are  
6 actually happening as far as you are aware? Please tick any that apply. [multi code]  
7

8 RANDOMISE ORDER OF STATEMENTS, anchor none of these to bottom  
9

- 10 a) There are hand washing facilities or hand gel dispensers at the entrance to the school that are working  
11 b) There are hand washing facilities or hand gel dispensers at the entrance to the classrooms that are  
12 working  
13 c) Children's hand washing or hand gel use is being monitored at school  
14 d) My child's class size is now 15 or fewer  
15 e) Children need to take in their own food and snacks  
16 f) Children are having their temperature checked on the way in  
17 g) The school has used markings or barriers to help children keep their distance from each other  
18 h) None of these are happening at [CHILD]'s school [exclusive]

19 Q22. Does [CHILD] have special educational needs? [single code]  
20

- 21 - Yes  
22 - No  
23 - Don't know / prefer not to say  
24

25 Q23. In the past 7 days, how many times, if at all, has [CHILD] left your home for each of the following  
26 reasons? [multi code]  
27

- 28 a) To go to the shops for groceries, toiletries or medicines  
29 b) To go to the shops for other items  
30 c) For exercise  
31 d) For a medical need (e.g. an outpatient appointment)  
32 e) To go to school  
33 f) To provide help to someone else  
34 g) To meet friends  
35 h) To meet family members who don't live with you  
36 i) For another reason

37 Q24. In the past 7 days, have you done the following, because of the risk from coronavirus:  
38

39 SCALE

- 40 - Yes  
41 - No  
42

43 STATEMENTS – RANDOMISE  
44

- 45 a. Washed your hands thoroughly and regularly  
46 b. Stayed 2m (3 steps) away from people you do not live with when outside your home  
47 c. Washed your clothes when you have returned home  
48 d. Washed [CHILD]'s clothes when she/ he has returned home  
49 e. Used tissues or clothing to touch door handles or other objects when outside  
50 f. Cleaned or disinfected items you have brought into the home, such as groceries or parcels  
51 g. Left items that you have brought into the home for 24 hours or more before using them, to kill any  
52 virus on them  
53 h. Covered your face or used a face mask when out and about  
54 i. Covered [CHILD]'s face or given her/him a face mask when out and about  
55 j. Worn protective gloves when out and about  
56 k. Made [CHILD] wear protective gloves when out and about  
57  
58  
59  
60

Q25. We are interested in how many people [CHILD] has had close contact with in the past 24 hours. By close contact we mean closer than 2 meters, for fifteen minutes or more. Please remember, this survey is anonymous so please be honest.

In the past 24 hours, how many people in the following categories has [CHILD] had close contact with: [multi code]

- a. Someone [CHILD] lives with
- b. Friends or other children who [CHILD] does not live with
- c. A family member aged under 70 who [CHILD] does not live with
- d. A family member aged over 70 who [CHILD] does not live with
- e. A babysitter, nanny or childminder
- f. Other children, not already reported above
- g. Other adults, not already reported above

Q26. Did [CHILD] attend school in the past 24 hours? [single code]

- a. Yes
- b. No

#### RANDOMISE ORDER OF Q27a AND Q27b SHOWN TO EACH RESPONDENT

Q27a. How much, if at all, do you agree or disagree with the following statements:

STATEMENTS (randomise order):

- a) If [CHILD] goes out, she/he is likely to catch coronavirus
- b) If [CHILD] goes out, she/he is likely to bring coronavirus back into our home
- c) [CHILD] is keeping up with her/his schoolwork
- d) I feel confident helping [CHILD] with her/his schoolwork
- e) I feel supported by [CHILD's] school
- f) I have access to all the resources that [CHILD] needs to do her/his schoolwork
- g) During lockdown, [CHILD] has learned about important things she/he wouldn't normally learn at school.
- h) In the past 7 days, [CHILD] has been bored

SCALE

- Strongly agree
- Tend to agree
- Neither agree nor disagree
- Tend to disagree
- Strongly disagree
- Not applicable

Q27b. How much, if at all, do you agree or disagree with the following statements:

STATEMENTS (randomise order):

- a) In the past 7 days, my household has had a regular structure to the day
- b) In the past 7 days, [CHILD] has kept in touch with her/his friends
- c) [CHILD] is worried about coronavirus
- d) In the past 7 days, [CHILD] has felt upset about not seeing other family members who do not live with us
- e) In the past 7 days, I have found it hard to keep up with work or other important commitments
- f) In the past 7 days, people in my household have been getting along well
- g) I am worried about the financial impact of lockdown measures
- h) Before the school closures, [CHILD] had extra support at school

SCALE

- Strongly agree
- Tend to agree

- Neither agree nor disagree
- Tend to disagree
- Strongly disagree
- Not applicable

Q28. To what extent, if at all, do you agree or disagree with the following statements?

RANDOMISE ORDER OF STATEMENTS

- a) If it were possible, I would feel comfortable sending [CHILD] to school next week.
- b) If it were possible, I would want to send [CHILD] to school next week.
- c) There is still too much coronavirus around for schools to be able to reopen safely
- d) When [CHILD's] school fully reopens, some parents will send their children to school, even if they have symptoms of coronavirus
- e) It is impossible for children to maintain 'social distancing' at school
- f) Children will not wash their hands properly at school
- g) Staff will not wash their hands properly at school
- h) Schools will not be able to provide good quality education at the moment
- i) School will not be an enjoyable place for [CHILD] to be at the moment

SCALE

- Strongly agree
- Tend to agree
- Neither agree nor disagree
- Tend to disagree
- Strongly disagree
- Not applicable

Q29A. Has [CHILD] had any of the following symptoms in the past 7 days? Please tick any that apply, no matter where you think the symptoms came from, and even if the symptoms were mild. [multi code]

RANDOMISE ORDER OF STATEMENTS, anchor "none of these" and "don't know" to bottom

- New, continuous cough
- High temperature / fever
- Runny nose
- Diarrhoea
- Nausea / feeling sick
- Vomiting
- Sneezing
- Loss of appetite
- Loss of sense of smell (fully or partial)
- Loss of taste
- None of these
- Don't know

Q29B. Have you, or anyone else in your household (excluding [CHILD]) had any of the following symptoms in the past 14 days? Please tick any that apply, no matter where you think the symptoms came from, and even if the symptoms were mild. [multi code]

RANDOMISE ORDER OF STATEMENTS, anchor "none of these" and "don't know" to bottom

- New, continuous cough
- High temperature / fever
- Runny nose
- Diarrhoea
- Nausea / feeling sick
- Vomiting
- Sneezing
- Loss of appetite
- Loss of sense of smell (fully or partial)

- Loss of taste
- None of these
- Don't know

Q30. Do you know if [CHILD] has had, or currently has, coronavirus? (Please select the option that BEST applies) [single code]

- a) They have definitely had it or definitely have it now
- b) They have probably had it or probably have it now
- c) They have probably not had it and probably don't have it now
- d) They have definitely not had it and definitely don't have it now

#### RANDOMISE ORDER OF Q31a AND Q31b SHOWN TO EACH RESPONDENT

Q31a. Please tell us how often each of these things happen to [CHILD]. There are no right or wrong answers.

##### SCALE

- *Never*
- *Sometimes*
- *Often*
- *Always*

##### STATEMENTS

- My child worries about things
- My child worries that something awful will happen to someone in the family
- My child worries that bad things will happen to him/her
- My child feels sad or empty
- Nothing is much fun for my child anymore
- My child has trouble sleeping
- My child has problems with his/her appetite
- My child has no energy for things

Q31b. Please tell us how often each of these things happen to [CHILD]. There are no right or wrong answers.

##### SCALE

- *Never*
- *Sometimes*
- *Often*
- *Always*

##### STATEMENTS

- My child worries that something bad will happen to him/her
- My child worries about what is going to happen
- My child thinks about death
- My child is tired a lot
- My child cannot think clearly
- My child feels worthless
- My child feels like he/she doesn't want to move
- My child feels restless

Q32. Thinking about next flu season (September 2020 – March 2021). During this time, you may be invited to vaccinate [CHILD] against flu. All primary school, but not secondary school children, are eligible for the child flu vaccine. For the following questions, please think about the next flu season.

For each of the following statements, please tell us to what extent, if at all, you agree or disagree:

I want [CHILD] to be vaccinated for flu next year (2020/21)

- Strongly agree
- Agree
- Neither agree nor disagree

- Disagree
- Strongly disagree
- Not applicable, [CHILD] will be in secondary school in next school year (2020/21)

IF Q32 = a-e

Q33 I intend [CHILD] to be vaccinated for flu next year (2020/21)

- Strongly agree
- Agree
- Neither agree nor disagree
- Disagree
- Strongly disagree
- Not applicable, [CHILD] will be in secondary school in next school year (2020/21)

Thinking now about yourself...

Q34. Over the last 2 weeks, how often have you been bothered by the following problems?

SCALE

- Not at all
- Several days
- More than half the days
- Nearly every day

STATEMENTS

- Feeling nervous, anxious or on edge
- Not being able to stop or control worrying
- Little interest or pleasure in doing things
- Feeling down, depressed, or hopeless

And finally, the following questions ask for some more information about you and your household.

D2. Which gender do you identify yourself with? [single code]

- Male
- Female
- Prefer to self-describe
- Prefer not to say

D3. What is your employment status? [single code]

- a. Full time paid job (31+ hours)
- b. Part time paid job (<31 hours)
- c. Doing paid work on a self-employed basis or within your own business
- d. Employed, but currently furloughed
- e. Student / On a government training programme (Nation Traineeship/Modern Apprenticeship)
- f. Out of work (6 months or less)
- g. Out of work (more than 6 months)
- h. Looking after home / Homemaker
- i. Retired
- j. Disabled OR Long-term sick
- k. Unpaid work for a business, community or voluntary organisation
- l. Prefer not to say

If answer a/b/c to D3

D4. Are you currently working from home? [single code]

- Yes
- No

1  
2  
3 D5. What is the highest level of educational qualification you have received? [single code]  
4

- 5 a. PhD/Doctor  
6 b. Master's  
7 c. Bachelor's Degree or equivalent (Such as a NVQ level 5)  
8 d. Higher education (Such as a HND or a NVQ level 4)  
9 e. A level or equivalent (Such as Scottish Highers or NVQ level 3)  
10 f. GCSE and below (Such as O level or an RSA Diploma)  
11 g. Other qualifications (Such as NVQ level 1)  
12 h. No qualifications  
13 i. Prefer not to say

14 D6. Which of the following income brackets best represents your household income, before tax deductions for  
15 income tax, National Insurance etc? [single code]  
16

- 17 a. Less than £5,000  
18 b. £5,000-£9,999  
19 c. £10,000-£14,999  
20 d. £15,000-£19,999  
21 e. £20,000-£24,999  
22 f. £25,000-£29,999  
23 g. £30,000-£34,999  
24 h. £35,000-£39,999  
25 i. £40,000-£44,999  
26 j. £45,000-£49,999  
27 k. £50,000-£59,999  
28 l. £60,000-£69,999  
29 m. £70,000-£84,999  
30 n. £85,000-£99,999  
31 o. More than £100,000  
32 p. Prefer not to say

33 D7. What is your current marital or civil partnership status? [single code]

- 34 a. Single (i.e. never married and never registered as a same sex civil-partnership)  
35 b. Co-habiting with partner (but never married or been in a civil partnership)  
36 c. Civil partnership  
37 d. Married  
38 e. Separated, but still legally married / in a civil partnership  
39 f. Divorced / Civil partnership legally dissolved  
40 g. Widowed / Surviving partner from a same-sex civil partnership

41 D8. Which of the following categories would best describe your ethnicity? [single code]  
42

- 43 a. English/Welsh/Scottish/Northern Irish/British  
44 b. Irish  
45 c. Gypsy or Irish Traveller  
46 d. Other  
47 e. White and Black Caribbean  
48 f. White and Black African  
49 g. White and Asian  
50 h. Other  
51 i. Indian  
52 j. Pakistani  
53 k. Bangladeshi  
54 l. Chinese  
55 m. Other  
56 n. Caribbean  
57 o. African  
58 p. Other  
59 q. Arab  
60 r. Any other (please specify)  
s. Prefer not to say

1  
2  
3 D10. How many children in each age group live in your household? [number list]  
4

- 5 - 0-3
- 6 - 4-10
- 7 - 11-15
- 8 - 16-18

9 Allow numerical input for each age group  
10

11 D11. Do you live with anyone over the age of 70 years? [single code]

- 12 a. Yes
- 13 b. No

14  
15 D12. Including yourself, how many people live in your household? [single code]

- 16 a. 2
- 17 b. 3
- 18 c. 4
- 19 d. 5
- 20 e. 6
- 21 f. 7
- 22 g. 8
- 23 h. 9
- 24 i. 10 or more

25  
26 D9. Do any of the following have a medical condition than might make them particularly vulnerable to  
27 coronavirus?

28 SCALE

- 29 - Yes
- 30 - No
- 31 - Don't know

32  
33 STATEMENTS

- 34 a. Yourself
- 35 b. [CHILD]
- 36 c. Anyone else you live with [show if D12 = b-i]

37  
38  
39 D13. [Record number] How many bedrooms does your home have?

40  
41 D14. [Multi code] Which of the following do you have access to at your home:

- 42 a) A garden
- 43 b) A patio / terrace
- 44 c) A balcony
- 45 d) Another form of outdoor space
- 46 e) No outdoor space

47  
48 Thank you for completing this survey. If you have any concerns about your child's mental health, please click  
49 [here](#).
